# Supplementary material for: Trends of gastric cancer burdens attributable to risk factors in China from 2000 to 2050
Source: PubMed Central journal article supplement — Lancet Reg Health West Pac. 2024 Jan 6;44:101003. doi: 10.1016/j.lanwpc.2023.101003 (PMC10806286; doi:10.1016/j.lanwpc.2023.101003), 2024-01-06
Supplement: mmc1.pdf [file mmc1.pdf]

## Supplementary Materials

### Trends of gastric cancer burdens attributable to risk factors in China from 2000 to 2050

#### Contents of the Supplementary Materials

**Supplementary Table 1.** Prevalence of modifiable risk factors and the relative risks associated with GC from 1990 to 2015.

**Supplementary Table 2.** Characteristics of the included studies on *H. pylori* infection.

**Supplementary Table 3.** Quality assessment of included *H. pylori* infection studies.

**Supplementary Table 4.** Attributable cases of modifiable risk factors for CGC from 2000 to 2050.

**Supplementary Table 5.** Attributable cases of modifiable risk factors for NCGC from 2000 to 2050.

**Supplementary Table 6.** The current PAF and attributable cases of modifiable risk factors for CGC in urban and rural areas.

**Supplementary Table 7.** The current PAF and attributable cases of modifiable risk factors for NCGC in urban and rural areas.

**Supplementary Table 8.** PAF of modifiable risk factors (excluding diabetes and underweight) for GC from 2000 to 2050.

**Supplementary Table 9.** Attributable cases of modifiable risk factors (excluding diabetes and underweight) for GC from 2000 to 2050.

23 **Supplementary Figure Legend**

24 **Supplementary Figure 1.** Flowchart of study selection for *H. pylori* infection.

25 Abbreviations: *H. pylori*, Helicobacter pylori.

26 **Supplementary Figure 2.** Trends of the age-standardized incidence rates (a) and  
27 number of new cases (b) of CGC and NCGC in males and females in China, 2000-2050.

28 Notes: The changing trends of the adjusted incidence rates from 2000 to 2016 were  
29 statistically significant for males in CGC (AAPC=-2.6%,  $P<0.001$ ), females in CGC  
30 (AAPC=-2.4%,  $P<0.001$ ), males in NCGC (AAPC=-2.7%,  $P<0.001$ ) and females in  
31 NCGC (AAPC=-2.4%,  $P<0.001$ ). Projected incidence rates for 2017-2050 based on  
32 adjusted incidence rates of CGC and NCGC from 2000-2016. Rates were age-adjusted  
33 to the world standard population. Abbreviations: CGC, cardia gastric cancer; NCGC,  
34 non-cardia gastric cancer.

35 **Supplementary Figure 3.** Trends in percentage change of demographic and risk  
36 factors affecting the prediction cases of GC overall and anatomical subsites from 2020  
37 to 2050. Abbreviations: GC, gastric cancer; CGC, cardia gastric cancer; NCGC, non-  
38 cardia gastric cancer.

39 **Supplementary Figure 4.** Trends of the incidence rates of CGC and NCGC by 5-year  
40 age groups from 2000 to 2050 for (a) CGC male, (b) CGC female, (c) NCGC male, (d)  
41 NCGC female. Abbreviations: CGC, cardia gastric cancer; NCGC, non-cardia gastric  
42 cancer.

43 **Supplementary Figure 5.** The forest plot of pooled prevalence of *H. pylori* infection  
44 in (a) 1990-1994, (b) 2000-2004, (c) 2005-2009, (d) 2010-2014, (e)2015-2019. The

45 pooled prevalence of *H. pylori* infection in 1995-1999 was calculated by extrapolation.

46 Abbreviations: *H. pylori*, Helicobacter pylori.

47 **Supplementary Figure 6.** Trends of the prevalence of *H. pylori* infection in the  
48 sensitivity by excluding studies with high risk of bias. Abbreviations: *H. pylori*,  
49 Helicobacter pylori.

50 **Supplementary Figure 7.** Time trends of population attributable fraction and estimated  
51 number of modifiable risk factors for males and females for GC in China. Notes: The  
52 scatter and bar represent estimated attributable fraction and cases from 2000 to 2050  
53 for (a) *H. pylori*, (b) Smoking, (c) Unhealthy BMI, (d) Diabetes, (e) Pickled vegetable,  
54 and (f) Alcohol consumption, respectively. Error bar represents the 95% CIs for  
55 attributable cases. The two y-axes on either side represent the attributable cases (left  
56 side) and the population attributable fraction (right side), respectively. Abbreviations:  
57 GC, gastric cancer; *H. pylori*, Helicobacter pylori; BMI, body mass index; CIs,  
58 confidence intervals; PAF: population attributable fraction.

59 **Supplementary Figure 8.** Changing trends of the birth rates and the age structure of  
60 the Chinese population from 1990 to 2021. Notes: The data on the birth rates and the  
61 age structure of the Chinese population were obtained from the *China Statistical*  
62 *Yearbook 2022* that issued by National Bureau of Statistics of China.

63

64

65

66

67

68 **Supplementary Methods**

69 **Quality control of gastric cancer data**

70 The comparability, validity, and completeness of the gastric cancer (GC) data were  
71 assessed using indicators including mortality/incidence rate ratios, percentage of cases  
72 with morphological verification , percentage of cases with death certificate-only, and  
73 the stability of cancer trends over years according to the criteria of “Cancer Incidence  
74 in Five Continents Volume IX” by International Agency for Research on  
75 Cancer/International Association of Cancer Registries (IARC/IACR) and the  
76 “Guideline for Chinese Cancer Registration”. All newly diagnosed cancer cases were  
77 coded according to the International Classification of Diseases for Oncology, 3rd  
78 edition (ICD-O-3) and the International Statistical Classification of Diseases, 10th  
79 revision (ICD-10). Cardia gastric cancer (CGC) (C16.0) and non-cardia gastric cancer  
80 (NCGC) (C16.1-16.8) were categorized as squamous cell carcinoma (M-8070/3),  
81 adenocarcinoma (M-8140/3, M-8144/3, M-8211/3, M-8260/3, M-8480/3), linitis  
82 plastica (M-8142/3), carcinoid tumor (M-8240/3), neuroendocrine carcinoma (M-  
83 8246/3), signet ring cell carcinoma (M-8490/3), sarcoma (M-8800/3), gastrointestinal  
84 mesenchymal sarcoma (M-8936/3), and unspecified type (M-9999/3).

85 **Gastric cancer cases estimation in China**

86 Firstly, the subcategory distribution of GC in 22 cancer registries was adjusted  
87 according to the national subcategory distribution ratios by sex (male/female) and 5-  
88 year age groups considering the subcategory distribution of GC varies between the 22

89 registries and the national level. Then, the incidence rates of CGC and NCGC in China  
90 from 2000 to 2015 were estimated according to the following formula:

$$91 \quad R_{i-1} = \frac{r_{i-1}}{r_i} \times R_i$$

92 Where  $R_i$  was the age-specific incidence rate by sex in China of  $i$  year,  $r_i$  was the  
93 age-specific incidence rate by sex in 22 cancer registries of  $i$  year.

#### 94 **The prototype equations of the Bayesian age-period-cohort model and prior**

95 Previous studies have used several methods to predict cancer incidence based on  
96 population data, including the Bayesian-APC model, Nordpred model, and Poisson  
97 regression<sup>1-3</sup>. The Non-identifiability has been a fundamental problem for the  
98 traditional Age-Period-Cohort model, which simultaneously incorporates three non-  
99 independent variables (age, period, and birth cohort)<sup>4,5</sup>. Comparative studies based on  
100 these prediction methods showed that the predictive performance and calibration of  
101 BAPC results were better than non-Bayesian APC models, and the BAPC model  
102 combined prior knowledge with observational data and was less dependent on  
103 parametric assumptions, which had more stable predictions over the long term<sup>6,7</sup>.  
104 Therefore, we estimated the projection of GC burden based on integrated nested  
105 Laplace approximations (INLA) for full Bayesian inference of the R packages (“BAPC”  
106 and “INLA”), and the BAPC model generated age-specific and age-standardized  
107 projected incidence, which smoothed the prediction and attenuated the effect of bias  
108 from extreme values<sup>8,9</sup>.

109 The frequentist age-period-cohort model was the general linear and could be formulated  
110 as:

111 
$$\log(\lambda_{apc}) = \mu + \alpha_a + \beta_p + \gamma_c$$

112 where  $\alpha$  denoted the age effect and  $a$  was the age groups (generally 5-year age groups,  
 113  $a=1, 2, 3 \dots 18$ ).  $\beta$  denoted the period effect and  $p$  was the specific year (assuming 1-  
 114 year interval,  $p=1, 2, 3 \dots n$ ).  $\gamma$  denoted the birth cohort effect and  $c$  was the number of  
 115 birth cohorts.

116  $\lambda_{apc}$  was the function for the corresponding age, period and birth cohort with the  
 117 following formula:

118 
$$\lambda_{apc} = f\left(\frac{n_{apc}}{N_{apc}}\right)$$

119 where  $n_{apc}$  and  $N_{apc}$  was the corresponding number of cases and population,  
 120 respectively. The function of  $\lambda_{apc}$  exhibited the Poisson, binomial, or negative  
 121 binomial distribution depending on the actual data.

122 On this basis, the Bayesian analysis provided a method of assuming probability,  
 123 synthesizing the prior knowledge of the unknown parameter with the sample  
 124 information to derive the posterior knowledge, and inferring the unknown parameter  
 125 according to the posterior information. The prior knowledge estimated according to the  
 126 following formula:

127 
$$P(A_i|B) = \frac{P(A_i)P(B|A_i)}{\sum_i^n P(A_i)P(B|A_i)} (i = 1, 2, \dots n)$$

128 where  $P(A_i)$  was the prior probability and  $P(A_i|B)$  was the posterior probability.

129 **Data on main risk factors and relative risk (RR) for gastric cancer**

130 The definitions of main risk factors were as follows: (1) *H. pylori* infection was defined  
 131 the positive status of infection by enzyme-linked immunosorbent assay (ELISA),

132 immunoblotting or urea breath test (UBT); (2) the alcohol consumption was defined the  
133 status of regular drinking alcohol at least three times a week; (3) smoking was defined  
134 the status of current smoking at accumulating up to 100 cigarettes or still smoking; (4)  
135 the intake of pickled vegetable was defined exclude those who did not use or consumed  
136 pickled vegetable minimally; (5) diabetes was defined by the American Diabetes  
137 Association criteria (self-report diabetes diagnosed by a health professional or with a  
138 fasting plasma glucose level of 126mg/dL or higher, a 2-hour plasma glucose level of  
139 200mg/dL or greater after a 75g oral glucose challenge, or HbA<sub>1c</sub> level of 6.5% or  
140 greater); (6) BMI was followed the classification criteria of the largest nested case-  
141 control study in Asia (Asia Cohort Consortium), using the BMI range of 22.6 to 25.0  
142 as the reference, with underweight (BMI<18.5) and overweight/obesity (BMI>25.0)  
143 combined as the unhealthy BMI. Selection of national surveys covering eastern, central  
144 and western regions, with the stable urban-rural ratio, male-female ratio and survey  
145 frequencies consistent with study period to obtain the prevalence of risk factors. Data  
146 on smoking and alcohol consumption were derived from six volumes of Analysis  
147 Reports of the National Health Services Surveys in China, which was initiated in 1993  
148 and conducted every five years using a multistage stratified probability sampling  
149 method. Up to 2018, the six volumes have cumulatively covered 31 provinces across  
150 China for 270,000 samples, with an urban-rural population rate of 1.10<sup>10</sup>. Data on BMI  
151 and pickled vegetable were extracted from the China Health and Nutrition Survey  
152 (CHNS), an ongoing open cohort that began in 1989 and has completed nine rounds of  
153 surveys with international collaboration between China and the US. CHNS used a

154 multistage, random cluster sampling method covering about 30,000 samples in 15  
155 provinces and municipal cities from 60 urban communities, 60 suburban communities,  
156 42 towns, and 126 villages across China<sup>11</sup>. For diabetes, we aggregated the prevalence  
157 by five nationally sampled studies with uniform definition on diabetes from 1994 to  
158 2017. By using a multistage stratified sampling method, the latest survey was conducted  
159 from 2015 to 2017 and covered 31 provinces and 75,880 individuals with an urban-  
160 rural population rate of 1.14<sup>12</sup>.

161 We attempted to prioritize the meta-analysis of the associations between these risk  
162 factors and CGC/NCGC to obtain RRs. The search strategy of the systematic review on  
163 the association between these risk factors and CGC/NCGC risk: We used the following  
164 key Medical Subject Heading terms and free words related to “cardia gastric cancer”,  
165 “non-cardia gastric cancer”, “Helicobacter pylori/smoking/alcohol  
166 consumption/pickled vegetable/diabetes/body weight”, “Cohort Studies” and “China”  
167 to conduct a systematic search on articles published in PubMed, Embase, China  
168 National Knowledge Infrastructure (CNKI) and Wanfang between January 1, 1990, and  
169 June 1, 2022. The final study inclusion criteria: (1) RRs and corresponding 95% CIs  
170 were reported or provided data to calculate; (2) Study design was a cohort study or  
171 nested case-control study; (3) Only the article with the largest sample size was selected  
172 among several studies conducted on the same population. However, due to the  
173 limitations of the existing literature, we were not able to obtain separate RRs for CGC  
174 and NCGC by using meta-analyses for most of the risk factors. Therefore, we finally  
175 decided to select the individual RRs for CGC and NCGC for *H. pylori* infection,



176 respectively, by using a sensitive detection method in a large Chinese cohort<sup>13</sup>, and use  
177 the RRs for GC overall based on the present meta-analysis of the target risk factor and  
178 GC for other risk factors<sup>14-18</sup>. Among these, non-sex-specific risk factors were defined  
179 as risk factors that were not explicitly identified as sex-specific in the Continuous  
180 Update expert Project 2018<sup>19</sup>, or risk factors that failed to obtain the sex-specific RR  
181 from meta-analyses or representative cohort studies of the association analysis of risk  
182 factors with GC in the Chinese population.

183 The search strategy of the systematic review on the prevalence of *H. pylori* infection in  
184 China: We used the following key Medical Subject Heading terms and free words  
185 related to “*Helicobacter pylori*”, “prevalence” and “China” to conduct a systematic  
186 search on articles published in PubMed, Embase, China National Knowledge  
187 Infrastructure (CNKI) and Wanfang between January 1, 1990, and June 1, 2022.

188 **Supplementary Figure 1** shows the flowchart of the study inclusion for the  
189 *Helicobacter pylori* (*H. pylori*) infection. The original articles reporting the prevalence  
190 of *H. pylori* infection in the general Chinese population were included (see  
191 **Supplementary Table 2**). We excluded studies based on the following criteria: (1)  
192 missing useful information about the study population, such as age, sex, and study  
193 period; (2) the prevalence reported only for children; (3) missing prevalence, or sample  
194 size and the number of positive infections unknown; (4) non-general population-based  
195 sampling. Then, we extracted useful information from the final articles including first  
196 author, publication year, sex, the prevalence of *H. pylori* infection, sample size, number  
197 of positive infections, study period, location, detection method and other relevant

198 information. The overall prevalence of *H. pylori* infection was calculated by using  
199 random effect meta-analysis. Subgroup meta-analyses were further conducted by the  
200 study periods. Cochran's Q statistic and  $I^2$  statistics were used to assess possible  
201 heterogeneity among included studies. The quality of the included articles was assessed  
202 using the Loney Score Criteria<sup>20</sup>, which were classified according to eight  
203 methodological criteria. **Supplementary Table 3** presents the results of the quality  
204 assessment for each study. To determine the effect of publication bias, we performed  
205 the following sensitivity analysis: excluding studies with a score of less than 5 points  
206 according to the Loney Criteria.

#### 207 **Attributable burden calculation**

208 The PAF of each risk factor was calculated from the following formula:

$$209 \quad PAF = \frac{\sum_{i=1}^n P_i(RR_i - 1)}{\sum_{i=1}^n P_i(RR_i - 1) + 1}$$

210 Where  $P_i$  was the prevalence of exposure category  $i$ ,  $RR_i$  was the RR at exposure  
211 category  $i$ ,  $n$  was the number of exposure categories.

212 To account for interaction among multiple risk factors, the overall PAFs for all relevant  
213 risk factors by cancer site were calculated from the following formula:

$$214 \quad PAF_{overall} = 1 - \prod_{r=1}^R (1 - PAF_r)$$

215 Where  $PAF_r$  was the PAF of the  $r$ th risk factor, and  $R$  refers to the number of risk  
216 factors.

217 The 95% CIs of PAFs were estimated using the variance of PAF based on the delta  
218 method from the following formula:

219 
$$\text{Var(PAF)} = \frac{[\exp(\beta) - 1]^2 \times \text{var}(P) + [P \times \exp(\beta)]^2 \times \text{var}(\beta)}{(P \times [\exp(\beta) - 1] + 1)^4}$$

220 
$$\beta = \ln RR$$

221 Where P is the prevalence of exposure risk factor and the variance of  $\beta$  was calculated  
222 from the CIs of RR. The variance of prevalence was considered null when the  
223 prevalence data represents data of the whole population.

224 PAFs of modifiable risk factors for CGC and NCGC were estimated by sex, and then  
225 multiplied by the corresponding CGC and NCGC cancer cases in selected periods to  
226 calculate the attributable cases with 95% CIs in males and females, respectively. The  
227 total attributed cases of modifiable risk factors in the Chinese population were the sum  
228 of attributed cases in males and females, and then divided by the total CGC and NCGC  
229 cases in China to determine the overall PAFs and corresponding 95% CIs.

230 The current estimates of PAFs and attributable cases of modifiable risk factors for CGC  
231 and NCGC in urban and rural areas were calculated by the prevalence of risk factors by  
232 urban and rural areas in 2015 and corresponding CGC/NCGC cases and RRs (the  
233 prevalence of *H. pylori* infection was obtained from urban/rural subgroup of above  
234 meta-analysis, and the prevalences of other risk factors were obtained from previously  
235 mentioned surveys).

236

237 **Reference:**

- 238 1. Yu J, Yang X, He W, Ye W. Burden of pancreatic cancer along with attributable risk factors in  
239 Europe between 1990 and 2019, and projections until 2039. *Int J Cancer* 2021; **149**(5): 993-1001.  
240 2. Liu Z, Xu K, Jiang Y, et al. Global trend of aetiology-based primary liver cancer incidence  
241 from 1990 to 2030: a modelling study. *Int J Epidemiol* 2021; **50**(1): 128-42.  
242 3. Arnold M, Laversanne M, Brown LM, Devesa SS, Bray F. Predicting the Future Burden of  
243 Esophageal Cancer by Histological Subtype: International Trends in Incidence up to 2030. *Am J*

244 *Gastroenterol* 2017; **112**(8): 1247-55.

245 4. Mason KO, Mason WM, Winsborough HH, Poole WK. Some Methodological Issues in Cohort  
246 Analysis of Archival Data. *American Sociological Review* 1973; **38**(2): 242-58.

247 5. Lin Y, Zheng Y, Wang HL, Wu J. Global Patterns and Trends in Gastric Cancer Incidence Rates  
248 (1988-2012) and Predictions to 2030. *Gastroenterology* 2021; **161**(1): 116-27 e8.

249 6. Møller B, Weedon-Fekjær H, Hakulinen T, et al. Prediction of cancer incidence in the Nordic  
250 countries up to the year 2020. *European journal of cancer prevention : the official journal of the*  
251 *European Cancer Prevention Organisation (ECP)* 2002; **11 Suppl 1**: S1-96.

252 7. Smith TR, Wakefield J. A Review and Comparison of Age–Period–Cohort Models for Cancer  
253 Incidence. *Statistical Science* 2016; **31**(4).

254 8. Fong Y, Rue H, Wakefield J. Bayesian inference for generalized linear mixed models.  
255 *Biostatistics* 2010; **11**(3): 397-412.

256 9. Rue H, Martino S, Chopin N. Approximate Bayesian inference for latent Gaussian models by  
257 using integrated nested Laplace approximations. *Journal of the Royal Statistical Society: Series B*  
258 *(Statistical Methodology)* 2009; **71**(2): 319-92.

259 10. Center for Health Statistics and Information (NHC). National Health Service Survey.  
260 [http://www.nhc.gov.cn/mohwsbwstjxxzx/s8211/new\\_list.shtml/](http://www.nhc.gov.cn/mohwsbwstjxxzx/s8211/new_list.shtml/).

261 11. UNC Carolina Population Center project. China Health and Nutrition Survey.  
262 <https://www.cpc.unc.edu/projects/china>.

263 12. Wang L, Peng W, Zhao Z, et al. Prevalence and Treatment of Diabetes in China, 2013-2018.  
264 *JAMA* 2021; **326**(24): 2498-506.

265 13. Yang L, Kartsonaki C, Yao P, et al. The relative and attributable risks of cardia and non-cardia  
266 gastric cancer associated with *Helicobacter pylori* infection in China: a case-cohort study. *The*  
267 *Lancet Public Health* 2021; **6**(12): e888-e96.

268 14. Nishino Y, Inoue M, Tsuji I, et al. Tobacco smoking and gastric cancer risk: an evaluation based  
269 on a systematic review of epidemiologic evidence among the Japanese population. *Jpn J Clin Oncol*  
270 2006; **36**(12): 800-7.

271 15. Deng W, Jin L, Zhuo H, Vasiliou V, Zhang Y. Alcohol consumption and risk of stomach cancer:  
272 A meta-analysis. *Chem Biol Interact* 2021; **336**: 109365.

273 16. Ren JS, Kamangar F, Forman D, Islami F. Pickled food and risk of gastric cancer--a systematic  
274 review and meta-analysis of English and Chinese literature. *Cancer Epidemiol Biomarkers Prev*  
275 2012; **21**(6): 905-15.

276 17. Tian T, Zhang LQ, Ma XH, Zhou JN, Shen J. Diabetes mellitus and incidence and mortality of  
277 gastric cancer: a meta-analysis. *Exp Clin Endocrinol Diabetes* 2012; **120**(4): 217-23.

278 18. Jang J, Wang T, Cai H, et al. The U-shaped association between body mass index and gastric  
279 cancer risk in the *Helicobacter pylori* Biomarker Cohort Consortium: A nested case-control study  
280 from eight East Asian cohort studies. *Int J Cancer* 2020; **147**(3): 777-84.

281 19. WCRF/AICR. Continuous Update Project Expert Report 2018: Diet, nutrition, physical  
282 activity and stomach cancer., 2018.

283 20. Loney PL, Chambers LW, Bennett KJ, Roberts JG, Stratford PW. Critical appraisal of the  
284 health research literature: prevalence or incidence of a health problem. *Chronic Dis Can* 1998; **19**(4):  
285 170-6.

286

287

Supplementary Table 1. Prevalence of modifiable risk factors and the relative risks associated with GC from 1990  
to 2015

| Risk factors                   | Prevalence of risk factors (%) |      |      |      |      |      |                    | Relative Risk (95% CIs)                                             |                            |
|--------------------------------|--------------------------------|------|------|------|------|------|--------------------|---------------------------------------------------------------------|----------------------------|
|                                | 1990                           | 1995 | 2000 | 2005 | 2010 | 2015 | <i>P</i> for trend | Estimates                                                           | Population source          |
| Men                            |                                |      |      |      |      |      |                    |                                                                     |                            |
| <i>H. pylori</i> <sup>a</sup>  | 62.1                           | 59.1 | 57.0 | 50.8 | 45.0 | 42.1 | <0.01              | [CGC]: 3.06 (1.54, 6.10)<br>[NCGC]: 5.94 (3.25, 10.86) <sup>1</sup> | China                      |
| Alcohol <sup>b</sup>           | 33.8                           | 29.4 | 15.3 | 16.1 | 18.1 | 15.6 | 0.05               | 1.31 (1.12, 1.54) <sup>2</sup>                                      | China                      |
| Smoking <sup>c</sup>           | 59.3                           | 53.4 | 48.9 | 48.0 | 48.1 | 48.7 | 0.03               | 1.79 (1.51, 2.12) <sup>3</sup>                                      | Japan*                     |
| Pickled vegetable <sup>d</sup> | 24.2                           | 23.7 | 19.3 | 18.3 | 18.3 | 15.6 | 0.04               | 1.48 (1.30, 1.66) <sup>4</sup>                                      | East Asia <sup>#</sup>     |
| Diabetes <sup>e</sup>          | 2.2                            | 5.2  | 10.6 | 12.1 | 11.7 | 13.7 | <0.01              | 1.19 (1.07, 1.32) <sup>5</sup>                                      | Asia <sup>^</sup>          |
| BMI <sup>f</sup>               |                                |      |      |      |      |      |                    |                                                                     |                            |
| <18.5                          | 9.5                            | 8.0  | 6.2  | 6.0  | 4.4  | 3.1  | <0.01              | 1.56 (1.03, 2.36)                                                   |                            |
| 18.5-20.0                      | 20.1                           | 16.6 | 13.3 | 10.5 | 8.2  | 4.8  | <0.01              | 1.33 (1.01, 1.76)                                                   |                            |
| 20.1-22.5                      | 40.3                           | 36.6 | 31.4 | 28.3 | 24.6 | 20.4 | <0.01              | 1.39 (1.15, 1.69)                                                   | East Asia <sup>&amp;</sup> |
| 22.6-25.0                      | 19.7                           | 22.5 | 26.0 | 27.1 | 28.5 | 31.4 | <0.01              | 1.00 (ref)                                                          |                            |
| 25.1-27.5                      | 7.4                            | 10.6 | 15.1 | 17.8 | 19.9 | 23.9 | <0.01              | 1.01 (0.80, 1.26)                                                   |                            |
| ≥27.5                          | 3.1                            | 5.7  | 8.1  | 10.2 | 14.5 | 16.5 | <0.01              | 1.48 (1.14, 1.91) <sup>6</sup>                                      |                            |
| Women                          |                                |      |      |      |      |      |                    |                                                                     |                            |
| <i>H. pylori</i> <sup>a</sup>  | 62.1                           | 59.1 | 57.0 | 50.8 | 45.0 | 42.1 | <0.01              | [CGC]: 3.06 (1.54, 6.10)<br>[NCGC]: 5.94 (3.25, 10.86) <sup>1</sup> | China                      |
| Alcohol <sup>b</sup>           | 3.1                            | 2.4  | 1.1  | 1.2  | 1.2  | 1.0  | <0.01              | 1.31 (1.12, 1.54) <sup>2</sup>                                      | China                      |
| Smoking <sup>c</sup>           | 5.0                            | 4.0  | 3.2  | 2.6  | 2.3  | 2.0  | <0.01              | 1.22 (1.07, 1.38) <sup>3</sup>                                      | Japan*                     |
| Pickled vegetable <sup>d</sup> | 25.5                           | 24.9 | 19.9 | 18.8 | 18.8 | 15.8 | <0.01              | 1.48 (1.30, 1.66) <sup>4</sup>                                      | East Asia <sup>#</sup>     |
| Diabetes <sup>e</sup>          | 2.4                            | 5.8  | 8.8  | 11.0 | 10.2 | 11.8 | <0.01              | 1.19 (1.07, 1.32) <sup>5</sup>                                      | Asia <sup>^</sup>          |
| BMI <sup>f</sup>               |                                |      |      |      |      |      |                    |                                                                     |                            |

|           |      |      |      |      |      |      |       |                                |                            |
|-----------|------|------|------|------|------|------|-------|--------------------------------|----------------------------|
| <18.5     | 9.8  | 8.1  | 7.1  | 6.6  | 5.6  | 4.4  | <0.01 | 1.56 (1.03, 2.36)              |                            |
| 18.5-20.0 | 18.7 | 15.5 | 11.7 | 10.5 | 9.3  | 6.0  | <0.01 | 1.33 (1.01, 1.76)              |                            |
| 20.1-22.5 | 34.3 | 32.5 | 29.3 | 28.1 | 25.6 | 23.4 | <0.01 | 1.39 (1.15, 1.69)              |                            |
| 22.6-25.0 | 22.1 | 24.0 | 26.1 | 26.5 | 26.6 | 28.1 | <0.01 | 1.00 (ref)                     | East Asia <sup>&amp;</sup> |
| 25.1-27.5 | 10.3 | 12.6 | 15.6 | 16.5 | 17.9 | 20.2 | <0.01 | 1.01 (0.80, 1.26)              |                            |
| ≥27.5     | 4.8  | 7.3  | 10.2 | 11.8 | 15.1 | 17.4 | <0.01 | 1.48 (1.14, 1.91) <sup>6</sup> |                            |

Abbreviations: *H. pylori*, helicobacter pylori; BMI, body mass index; GC, gastric cancer; CGC, cardia gastric cancer; NCGC: non-cardia gastric cancer; ref, reference.

<sup>a</sup>The positive status of *H. pylori* infection as defined by enzyme-linked immunosorbent assay (ELISA), immunoblotting or urea breath test (UBT).

<sup>b</sup>Currently smoking, accumulated up to 100 cigarettes, and still smoking.

<sup>c</sup>Regular alcohol consumption, drinking alcohol at least three times a week.

<sup>d</sup>Exclude those who did not use or consumed pickled vegetable minimally.

<sup>e</sup>The diabetes as defined by the American Diabetes Association criteria.

<sup>f</sup>BMI followed the classification criteria of the largest nested case-control study in Asia (Asia Cohort Consortium), using the BMI range of 22.6 to 25.0 as the reference, with underweight (BMI<18.5) and overweight/obesity (BMI>25.0) combined as the unhealthy BMI

\*The RR between smoking and gastric cancer was obtained from a systematic review of epidemiologic evidence among the Japanese population.

#The RR between pickled vegetable and gastric cancer was obtained from a systematic review and meta-analysis of predominantly Eastern Asian population (50% from China, 21.6% from Japan and 10% from Korea).

^The RR between diabetes and gastric cancer was obtained from the subgroup analysis in Asian population of a meta-analysis.

&The RR between BMI and gastric cancer was obtained from a nested case-control study pooling eight East Asian cohort studies.

## Reference

1. Yang L, Kartsonaki C, Yao P, et al. The relative and attributable risks of cardia and non-cardia gastric cancer associated with *Helicobacter pylori* infection in China: a case-cohort study. *The Lancet Public Health* 2021;6:e888-e896.
2. Deng W, Jin L, Zhuo H, et al. Alcohol consumption and risk of stomach cancer: A meta-analysis. *Chem Biol Interact*

2021;336:109365.

3. Nishino Y, Inoue M, Tsuji I, et al. Tobacco smoking and gastric cancer risk: an evaluation based on a systematic review of epidemiologic evidence among the Japanese population. *Jpn J Clin Oncol* 2006;36:800-7.
4. Ren JS, Kamangar F, Forman D, et al. Pickled food and risk of gastric cancer--a systematic review and meta-analysis of English and Chinese literature. *Cancer Epidemiol Biomarkers Prev* 2012;21:905-15.
5. Tian T, Zhang LQ, Ma XH, et al. Diabetes mellitus and incidence and mortality of gastric cancer: a meta-analysis. *Exp Clin Endocrinol Diabetes* 2012;120:217-23.
6. Jang J, Wang T, Cai H, et al. The U-shaped association between body mass index and gastric cancer risk in the Helicobacter pylori Biomarker Cohort Consortium: A nested case-control study from eight East Asian cohort studies. *Int J Cancer* 2020;147:777-784.



Supplementary Table 2. Characteristics of the included *H. pylori* infection studies

| Author, Publication             | Region         | Study period (midpoint) | Study design     | Age range | Sex ratio (F/M) | Sample Size | Detection method | <i>H. pylori</i> prevalence (%) |
|---------------------------------|----------------|-------------------------|------------------|-----------|-----------------|-------------|------------------|---------------------------------|
| Ma et al, 2005 <sup>1</sup>     | Shandong       | 1990                    | Population-based | 35-64     | -               | 2,469       | Serology/UBT     | 64.93                           |
| Brown et al, 2001 <sup>2</sup>  | Shandong       | 1994                    | Population-based | 18-69     | 0.97            | 3,288       | Serology         | 60.64                           |
| Groves et al, 2002 <sup>3</sup> | Shandong       | 1994                    | Population-based | 18-69     | -               | 388         | Serology         | 63.92                           |
| Wong et al, 1999 <sup>4</sup>   | Fujian         | 1994                    | Population-based | 18-76     | -               | 1,828       | Serology         | 80.91                           |
| Jiang et al, 1996 <sup>5</sup>  | Shandong       | 1994                    | Population-based | 40-69     | 0.85            | 218         | UBT              | 71.10                           |
| Zhai et al, 1994 <sup>6</sup>   | Shanghai       | 1992                    | Population-based | 18-59     | 0.13            | 2,336       | Serology         | 51.37                           |
| Wang et al, 1996 <sup>7</sup>   | Henan          | 1994                    | Population-based | 20-69     | 1.99            | 464         | Serology         | 42.03                           |
| He et al, 2001 <sup>8</sup>     | Fujian         | 2001                    | Population-based | 38.7±8.5  | 0.15            | 1,076       | Serology/UBT/PCR | 67.01                           |
| Fan et al, 2004 <sup>9</sup>    | Hebei          | 2004                    | Population-based | 6-59      | 1.21            | 263         | Serology         | 57.41                           |
| Chen et al, 2003 <sup>10</sup>  | Shanghai       | 2004                    | Population-based | 37.0±11.0 | 0.99            | 1,822       | Serology/UBT     | 66.36                           |
| Shi et al, 2008 <sup>11</sup>   | Jiangsu        | 2004                    | Population-based | 47.8±14.8 | 1.34            | 1,371       | Serology/UBT     | 62.07                           |
| Chen et al, 2007 <sup>12</sup>  | Guangdong      | 2003                    | Population-based | 3-92      | 0.94            | 1,471       | Serology         | 47.04                           |
| Cheng et al, 2009 <sup>13</sup> | Beijing        | 2003                    | Population-based | -         | 0.88            | 1,232       | UBT              | 46.75                           |
| Nie et al, 2007 <sup>14</sup>   | Shandong       | 2002                    | Population-based | 18-69     | 1.18            | 242         | UBT              | 53.72                           |
| Luo et al, 2010 <sup>15</sup>   | Guizhou        | 2004                    | Population-based | 40.3±14.5 | 0.89            | 801         | Serology         | 55.18                           |
| Suo et al, 2011 <sup>16</sup>   | Inner Mongolia | 2008-2009 (2008.5)      | Population-based | 42.2±16.4 | 0.88            | 1,000       | UBT              | 64.40                           |
| Zhu et al, 2011 <sup>17</sup>   | Zhejiang       | 2006-2008 (2007)        | Population-based | 9-72      | 1.06            | 1,850       | Serology/UBT     | 72.59                           |
| Zhou et al, 2005 <sup>18</sup>  | Hubei          | 2006-2007 (2006.5)      | Population-based | 43.8±10.7 | 0.86            | 1,846       | UBT              | 45.18                           |
| Zeng et al, 2008 <sup>19</sup>  | Chongqing      | 2008                    | Population-based | 20-81     | 0.52            | 3,254       | Serology         | 37.12                           |
| Zhou et al, 2010 <sup>20</sup>  | Sichuan        | 2007-2010 (2008.5)      | Population-based | 6-82      | 0.88            | 4,000       | Histology        | 27.33                           |

|                                 |           |                       |                  |           |      |        |          |       |
|---------------------------------|-----------|-----------------------|------------------|-----------|------|--------|----------|-------|
| Guo et al, 2006 <sup>21</sup>   | Xinjiang  | 2006                  | Population-based | 20-60     | 1.03 | 5,122  | Serology | 61.95 |
| Zhang et al, 2009 <sup>22</sup> | Gansu     | 2006                  | Population-based | 19-60     | 1.16 | 797    | Serology | 81.81 |
| Lao et al, 2008 <sup>23</sup>   | Guangdong | 2006                  | Population-based | 20-68     | 0.58 | 2,379  | Serology | 27.24 |
| Zheng et al, 2013 <sup>24</sup> | Beijing   | 2005-2011<br>(2008.5) | Population-based | 46.6±7.9  | 0.50 | 51,025 | UBT      | 49.50 |
| Chen et al, 2012 <sup>25</sup>  | Guangdong | 2009                  | Population-based | 40.3±3.5  | 0.42 | 1,452  | Serology | 40.91 |
| Liu et al, 2015 <sup>26</sup>   | Guangdong | 2002-2009<br>(2005)   | Population-based | 54.4±9.3  | 0.77 | 2,689  | UBT      | 42.99 |
| Yang et al, 2009 <sup>27</sup>  | Guizhou   | 2006                  | Population-based | 60.3±12.6 | 0.85 | 592    | Serology | 59.46 |
| Huang et al, 2015 <sup>28</sup> | Jiangsu   | 2007-2009<br>(2008)   | Population-based | 46.7±9.8  | 0.49 | 3,208  | UBT      | 50.56 |
| Kong et al, 2017 <sup>29</sup>  | Shandong  | 2013-2014<br>(2013.5) | Population-based | 48.6±14.3 | 0.41 | 22,044 | Serology | 20.60 |
| Li et al, 2016 <sup>30</sup>    | Tianjin   | 2014                  | Population-based | 19-92     | 1.16 | 11,096 | Serology | 30.52 |
| Zhang et al, 2013 <sup>31</sup> | Liaoning  | 2011                  | Population-based | 18-90     | 0.09 | 1,237  | Serology | 48.75 |
| Jiang et al, 2015 <sup>32</sup> | Liaoning  | 2013                  | Population-based | 1-100     | 0.86 | 4,127  | Serology | 29.68 |
| Wang et al, 2011 <sup>33</sup>  | Liaoning  | 2010                  | Population-based | 38±10     | 0.26 | 3,995  | Serology | 44.83 |
| Zhang et al, 2016 <sup>34</sup> | Jilin     | 2014                  | Population-based | 21-60     | 1.23 | 1,932  | Serology | 35.61 |
| Huang et al, 2015 <sup>28</sup> | Jiangsu   | 2013                  | Population-based | 47.5±10.4 | 0.40 | 2,814  | UBT      | 48.83 |
| Shen et al, 2014 <sup>35</sup>  | Zhejiang  | 2012                  | Population-based | 45.8±15.5 | 0.84 | 7,911  | Serology | 50.94 |
| Yang et al, 2015 <sup>36</sup>  | Zhejiang  | 2013                  | Population-based | 20-70     | 0.58 | 15,187 | UBT      | 56.70 |
| Zhu et al, 2012 <sup>37</sup>   | Zhejiang  | 2011                  | Population-based | 20-80     | 1.16 | 9,285  | Serology | 38.27 |
| Cheng et al, 2012 <sup>38</sup> | Hubei     | 2012                  | Population-based | 31-88     | 0.31 | 2,975  | UBT      | 41.48 |
| Yang et al, 2011 <sup>39</sup>  | Hainan    | 2010                  | Population-based | 19-60     | 0.00 | 1,714  | Serology | 57.47 |
| Deng et al, 2011 <sup>40</sup>  | Chongqing | 2010                  | Population-based | 18-82     | 0.58 | 27,177 | Serology | 34.20 |
| Yang et al, 2015 <sup>36</sup>  | Sichuan   | 2013                  | Population-based | 20-80     | 0.67 | 1,141  | UBT      | 58.72 |
| Li et al, 2013 <sup>41</sup>    | Sichuan   | 2013                  | Population-based | 20-69     | 0.76 | 4,517  | Serology | 35.80 |
| Tang et al, 2014 <sup>42</sup>  | Sichuan   | 2014                  | Population-based | 46.3±11.4 | 0.69 | 8,365  | UBT      | 53.13 |

|                                 |           |                       |                  |           |      |        |           |       |
|---------------------------------|-----------|-----------------------|------------------|-----------|------|--------|-----------|-------|
| Yang et al, 2011 <sup>39</sup>  | Sichuan   | 2010-2011<br>(2010.5) | Population-based | 3-82      | 0.59 | 2,400  | UBT       | 44.08 |
| Cao et al, 2013 <sup>43</sup>   | Xinjiang  | 2012                  | Population-based | 25-81     | 0.92 | 288    | Serology  | 34.38 |
| Dong et al, 2016 <sup>44</sup>  | Shandong  | 2014                  | Population-based | 3-83      | 0.56 | 1,703  | Serology  | 55.08 |
| Liu et al, 2015 <sup>26</sup>   | Shandong  | 2010-2012<br>(2011)   | Population-based | 20-90     | 0.49 | 11,714 | Serology  | 45.25 |
| Tian et al, 2016 <sup>45</sup>  | Beijing   | 2013                  | Population-based | 1-70      | 1.54 | 520    | UBT       | 29.62 |
| Cao et al, 2017 <sup>46</sup>   | Guangxi   | 2012-2016<br>(2014)   | Population-based | 7-69      | 0.90 | 3,363  | Serology  | 47.25 |
| Liu et al, 2013 <sup>47</sup>   | Jiangxi   | 2010                  | Population-based | 30.3±9.1  | 0.68 | 633    | Serology  | 48.66 |
| Liu et al, 2016 <sup>48</sup>   | Jiangxi   | 2014                  | Population-based | 46.5±10.3 | 0.64 | 4,513  | UBT       | 48.02 |
| Guo et al, 2013 <sup>49</sup>   | Gansu     | 2012                  | Population-based | 30-79     | 1.03 | 671    | Serology/ | 51.56 |
| Zhang et al, 2013 <sup>31</sup> | Shanxi    | 2014                  | Population-based | 20-69     | 1.86 | 406    | UBT       | 47.04 |
| Chen et al, 2013 <sup>50</sup>  | Shanghai  | 2011                  | Population-based | 43.7±3.8  | 0.53 | 855    | Serology  | 45.26 |
| Jia et al, 2018 <sup>51</sup>   | Yunnan    | 2014                  | Population-based | 48.4±10.7 | 0.42 | 1,860  | UBT       | 33.55 |
| Xu et al, 2014 <sup>52</sup>    | Zhejiang  | 2013                  | Population-based | 46.0±7.0  | 0.68 | 8,820  | UBT       | 43.75 |
| Zhu et al, 2014 <sup>53</sup>   | Jiangsu   | 2009-2011<br>(2010)   | Population-based | 30-69     | 1.31 | 5,417  | UBT       | 63.41 |
| Fan et al, 2018 <sup>54</sup>   | Shanghai  | 2013                  | Population-based | 48.3±15.0 | 0.96 | 28,171 | UBT       | 38.51 |
| Xu et al, 2017 <sup>55</sup>    | Beijing   | 2014                  | Population-based | 46.0±18.0 | 0.49 | 17,791 | Serology  | 43.86 |
| Gao et al, 2017 <sup>56</sup>   | Guangdong | 2013                  | Population-based | 43.2±15.4 | 0.68 | 1,000  | UBT       | 51.00 |
| Wu et al, 2014 <sup>57</sup>    | Beijing   | 2012                  | Population-based | 49.8±8.1  | 0.44 | 10,331 | UBT       | 44.42 |
| Meng et al, 2015 <sup>58</sup>  | Jiangsu   | 2012                  | Population-based | 46.5±11.7 | 0.92 | 1,598  | UBT       | 44.43 |
| Mao et al, 2015 <sup>59</sup>   | Jiangsu   | 2014                  | Population-based | 18-69     | 1.15 | 312    | UBT       | 35.26 |
| Yan et al, 2013 <sup>60</sup>   | Shanghai  | 2010-2013<br>(2012)   | Population-based | 17-81     | 0.83 | 1,507  | Serology  | 48.04 |
| Yang et al, 2013 <sup>61</sup>  | Guangdong | 2011-2013<br>(2012)   | Population-based | 18-69     | 1.07 | 4,615  | UBT       | 58.50 |

|                                 |           |                       |                  |           |      |         |          |       |
|---------------------------------|-----------|-----------------------|------------------|-----------|------|---------|----------|-------|
| Chen et al, 2011 <sup>62</sup>  | Henan     | 2011                  | Population-based | 10-88     | 0.60 | 802     | UBT      | 45.14 |
| Xie et al, 2014 <sup>63</sup>   | Guangdong | 2013                  | Population-based | 21-70     | 0.57 | 2,963   | Serology | 54.98 |
| Zhou et al, 2015 <sup>64</sup>  | Shandong  | 2013                  | Population-based | 20-60     | 1.01 | 386     | UBT      | 63.47 |
| Li et al, 2012 <sup>65</sup>    | Anhui     | 2010-2011<br>(2010.5) | Population-based | 20-79     | 0.43 | 2,283   | Serology | 16.08 |
| Kong et al, 2013 <sup>66</sup>  | Guizhou   | 2013                  | Population-based | 20-59     | 0.40 | 3,370   | UBT      | 65.40 |
| Zhou et al, 2014 <sup>67</sup>  | Jiangsu   | 2009-2013<br>(2011)   | Population-based | 20-61     | 0.60 | 35,921  | Serology | 43.12 |
| Gao et al, 2010 <sup>68</sup>   | Henan     | 2010                  | Population-based | 25-89     | 0.49 | 641     | Serology | 31.36 |
| Yu et al, 2016 <sup>69</sup>    | Gansu     | 2014                  | Population-based | 51.1±13.0 | 0.42 | 3,239   | UBT      | 51.84 |
| Qian et al, 2011 <sup>70</sup>  | Guangdong | 2010                  | Population-based | 18-60     | 0.63 | 2,840   | Serology | 46.97 |
| Zhang et al, 2016 <sup>34</sup> | Liaoning  | 2014                  | Population-based | 50.1±0.2  | 0.46 | 4,256   | UBT      | 46.01 |
| Wang et al, 2014 <sup>71</sup>  | Xinjiang  | 2013                  | Population-based | 0-80      | 1.26 | 807     | Serology | 24.29 |
| Kong et al, 2012 <sup>72</sup>  | Guizhou   | 2011                  | Population-based | 15-81     | 0.88 | 392     | UBT      | 83.67 |
| Tu et al, 2012 <sup>73</sup>    | Gansu     | 2011                  | Population-based | 41.4±3.3  | 0.83 | 655     | UBT      | 75.73 |
| Wang et al, 2014 <sup>74</sup>  | Zhejiang  | 2013                  | Population-based | 45.7±11.3 | 0.43 | 852     | Serology | 51.41 |
| Li et al, 2012 <sup>65</sup>    | Tianjin   | 2010                  | Population-based | 23-87     | 1.12 | 292     | Serology | 35.27 |
| Gong et al, 2017 <sup>75</sup>  | Shanghai  | 2014                  | Population-based | 40.1±10.4 | 0.00 | 3,022   | UBT      | 34.22 |
| Xia et al, 2016 <sup>76</sup>   | Tianjin   | 2007-2012<br>(2010)   | Population-based | 43.2±0.5  | 0.78 | 10,407  | Serology | 28.60 |
| Shan et al, 2017 <sup>77</sup>  | Liaoning  | 2010-2011<br>(2010.5) | Population-based | 37-87     | 1.35 | 395     | Serology | 46.84 |
| Liu et al, 2012 <sup>78</sup>   | Shanxi    | 2011-2012<br>(2011.5) | Population-based | 20-78     | 0.53 | 13,632  | Serology | 40.52 |
| Pan et al, 2016 <sup>79</sup>   | Shandong  | 2011-2013<br>(2012)   | Population-based | 25-543    | 1.18 | 183,970 | UBT      | 57.60 |
| Liu et al, 2017 <sup>80</sup>   | Chongqing | 2014                  | Population-based | -         | 0.89 | 10,912  | UBT      | 34.37 |
| Qu et al, 2017 <sup>81</sup>    | Sichuan   | 2014                  | Population-based | 18-69     | 0.59 | 25,160  | UBT      | 38.00 |

|                                     |          |                  |                  |           |      |        |              |       |
|-------------------------------------|----------|------------------|------------------|-----------|------|--------|--------------|-------|
| Ayinuer A et al, 2017 <sup>82</sup> | Xinjiang | 2014             | Population-based | 18-69     | 0.52 | 2,188  | UBT          | 43.88 |
| Ji et al, 2016 <sup>83</sup>        | Liaoning | 2013-2015 (2015) | Population-based | 18-88     | 1.10 | 4,214  | Serology     | 21.76 |
| Shao et al, 2016 <sup>84</sup>      | Liaoning | 2016             | Population-based | 8-101     | 0.57 | 15,739 | UBT          | 33.98 |
| Pan et al, 2017 <sup>85</sup>       | Jiangsu  | 2015             | Population-based | 1-90      | 0.96 | 9,076  | Serology     | 50.71 |
| Li et al, 2016 <sup>86</sup>        | Zhejiang | 2015             | Population-based | 42.3±5.4  | 0.88 | 9,856  | UBT          | 40.46 |
| Jia et al, 2016 <sup>87</sup>       | Hubei    | 2015             | Population-based | 18-60     | 0.92 | 2,180  | UBT          | 47.02 |
| Zhang et al, 2017 <sup>88</sup>     | Hubei    | 2017             | Population-based | 42.3±10.1 | 0.82 | 916    | UBT          | 41.70 |
| Ma et al, 2015 <sup>89</sup>        | Hainan   | 2015             | Population-based | 21-81     | 0.94 | 4,122  | Histology    | 25.64 |
| Qin et al, 2017 <sup>90</sup>       | Shandong | 2015             | Population-based | 7-90      | 0.62 | 4,611  | UBT          | 52.66 |
| Wu et al, 2019 <sup>91</sup>        | Zhejiang | 2016             | Population-based | 35.8±21.5 | 1.25 | 2,860  | Serology/UBT | 47.73 |
| Su et al, 2018 <sup>92</sup>        | Beijing  | 2018             | Population-based | 28-93     | 0.22 | 4,950  | UBT          | 34.04 |
| Xu et al, 2015 <sup>93</sup>        | Guangxi  | 2015             | Population-based | 20-65     | 0.70 | 2,956  | UBT          | 45.30 |
| Wang et al, 2017 <sup>94</sup>      | Jiangxi  | 2016             | Population-based | 18-79     | 0.35 | 6,165  | UBT          | 37.71 |
| Mo et al, 2019 <sup>95</sup>        | Ningxia  | 2018             | Population-based | 17-73     | 0.67 | 841    | UBT          | 33.89 |
| Wang et al, 2016 <sup>96</sup>      | Shanxi   | 2015             | Population-based | 18-59     | 0.77 | 3,447  | UBT          | 49.46 |
| Wang et al, 2017 <sup>94</sup>      | Shanxi   | 2016             | Population-based | 21-70     | 0.74 | 3,214  | UBT          | 54.32 |
| Zhang et al, 2017 <sup>88</sup>     | Shanghai | 2017             | Population-based | 18-90     | 0.92 | 5,164  | UBT          | 36.35 |
| Ma et al, 2015 <sup>89</sup>        | Shanghai | 2015             | Population-based | 20-93     | 0.37 | 58,876 | UBT          | 42.36 |
| Sun et al, 2018 <sup>97</sup>       | Shanghai | 2016             | Population-based | 40-93     | 1.28 | 3,258  | Serology     | 34.13 |
| Qu et al, 2018 <sup>98</sup>        | Shanghai | 2018             | Population-based | 45.7±13.6 | 3.13 | 524    | UBT          | 58.02 |
| Cai et al, 2018 <sup>99</sup>       | Tibet    | 2015             | Population-based | 18-69     | 1.26 | 1,000  | UBT          | 56.70 |
| Shu et al, 2019 <sup>100</sup>      | Zhejiang | 2015             | Population-based | 54.2±9.6  | 0.86 | 3,014  | UBT          | 27.50 |
| Wang et al, 2017 <sup>94</sup>      | Hebei    | 2016             | Population-based | 44.5±13.6 | 1.01 | 4,796  | UBT          | 52.25 |
| Gu et al, 2019 <sup>101</sup>       | Tianjin  | 2015             | Population-based | 18-69     | 0.77 | 5,558  | UBT          | 49.05 |
| Xie et al, 2019 <sup>102</sup>      | Henan    | 2015             | Population-based | 40-69     | 1.19 | 2,003  | UBT          | 41.34 |
| Li et al, 2020 <sup>103</sup>       | Sichuan  | 2017             | Population-based | 45.9±12.4 | 0.65 | 33,153 | UBT          | 42.07 |

|                                  |          |                       |                  |           |      |        |              |       |
|----------------------------------|----------|-----------------------|------------------|-----------|------|--------|--------------|-------|
| Shuai et al, 2020 <sup>104</sup> | Beijing  | 2019                  | Population-based | 44.7±12.0 | 0.88 | 8,323  | UBT          | 28.93 |
| Guo et al, 2019 <sup>105</sup>   | Anhui    | 2017                  | Population-based | 49.2±14.3 | 1.21 | 9,684  | UBT          | 31.31 |
| Xie et al, 2017 <sup>106</sup>   | Yunnan   | 2016                  | Population-based | 63.5±0.4  | 0.72 | 8,790  | UBT          | 32.81 |
| Yang et al, 2019 <sup>107</sup>  | Tibet    | 2015-2016<br>(2015.5) | Population-based | 43.5±10.3 | 1.15 | 544    | UBT          | 30.51 |
| Guo et al, 2019 <sup>108</sup>   | Liaoning | 2018                  | Population-based | 46.7±12.7 | 0.59 | 11,775 | UBT          | 30.99 |
| Wei et al, 2018 <sup>109</sup>   | Hebei    | 2016                  | Population-based | 47.6±12.1 | 0.49 | 2,877  | UBT          | 58.08 |
| Fu et al, 2018 <sup>110</sup>    | Hubei    | 2016                  | Population-based | 45.3±9.1  | 0.57 | 1,883  | UBT          | 44.18 |
| Han et al, 2020 <sup>111</sup>   | Shandong | 2017                  | Population-based | 49.0±13.0 | 0.44 | 2,557  | Serology     | 57.37 |
| Xu et al, 2019 <sup>112</sup>    | Sichuan  | 2017                  | Population-based | 14-87     | 0.58 | 18,684 | Serology/UBT | 31.44 |
| Wang et al, 2017 <sup>94</sup>   | Shandong | 2015                  | Population-based | 43.8±10.2 | 0.80 | 2,013  | UBT          | 60.56 |
| Yan et al, 2017 <sup>113</sup>   | Zhejiang | 2015                  | Population-based | 40-69     | 0.51 | 1,641  | UBT          | 51.49 |
| Cheng et al, 2017 <sup>114</sup> | Jiangxi  | 2016                  | Population-based | 59.9±1.3  | 0.97 | 235    | UBT          | 48.94 |
| Hu et al, 2019 <sup>115</sup>    | Hubei    | 2016-2017<br>(2016.5) | Population-based | 43.4±12.3 | 0.68 | 10,843 | UBT          | 34.96 |
| Zhang et al, 2020 <sup>116</sup> | Zhejiang | 2017                  | Population-based | 46.3±12.8 | -    | 39,091 | UBT          | 45.63 |

## Reference

1. Ma JL, Zhang L, Pan KF, et al. Helicobacter pylori and the progression of gastric cancer: a 10-year cohort study. National Medical Journal of China 2005;27-30.
2. Brown LM, Thomas TL, Ma JL, et al. Helicobacter pylori infection in rural China: exposure to domestic animals during childhood and adulthood. Scand J Infect Dis 2001;33:686-91.
3. Groves FD, Perez-Perez G, Zhang L, et al. Serum antibodies to Helicobacter pylori and the CagA antigen do not explain

- differences in the prevalence of precancerous gastric lesions in two Chinese populations with contrasting gastric cancer rates. *Cancer Epidemiol Biomarkers Prev* 2002;11:1091-4.
4. Wong BC, Lam SK, Ching CK, et al. Seroprevalence of cytotoxin-associated gene A positive *Helicobacter pylori* strains in Changle, an area with very high prevalence of gastric cancer in south China. *Aliment Pharmacol Ther* 1999;13:1295-302.
  5. Jiang Ji;Zhang Lian;Zhao Lei;Chang Yunsheng;Wang Shizhen ea. Preliminary Investigation of *Helicobacter Pylori* Infection in Linqu County of Shandong Province. *ACTA ACADEMIAE MEDICINAE SINICAE* 1996:129-132.
  6. Zhai Huiping YK, Fang Guifen. Epidemiological investigation of *Helicobacter pylori* infection rate among car drivers. *SHANGHAI MEDICAL JOURNAL* 1994:334-335.
  7. Wang Kaijuan CJ, Zhang Jianying, Zhang Jianzhong, Gao Sanyou, Jiang Xiugao, Zhang Meixi, Dai Liping. Study on the Epidemiology of HP infection among 464 School Staff in Henan Province. *Chinese Journal of Epidemiology* 1996:99-101.
  8. He Xiangyang JZ, Yang Shunqi, Mei Yanyan, Wen Qin, Jiang Yingzi, Wang Jianmiao. The Endemiology of *Helicobacter Pylorus* Infection and Gastro-Intestinal Disease in Mine and Related Factory Workers of Tong-Ling City, Anwhei. *Journal of Radioimmunology* 2006:31-33.
  9. Fan Hongmin YJ, Xu Yingjun, Zhang Tianzhe. A seroepidemiology survey on *Helicobacter pylori* infection in rural families.

- World Chinese Journal of Digestology 2006:2948-2953.
10. Chen Shiyao LT, Fan Xiaoming, Dong Ling, Fang Guoting, Tu Chuanxu, Gu Xiuying, Wang Jiyao. Epidemiological study of *Helicobacter pylori* infection and its risk factors in Shanghai. National Medical Journal of China 2005:802-806.
  11. Shi R, Xu S, Zhang H, et al. Prevalence and risk factors for *Helicobacter pylori* infection in Chinese populations. *Helicobacter* 2008;13:157-65.
  12. Chen J, Bu XL, Wang QY, et al. Decreasing seroprevalence of *Helicobacter pylori* infection during 1993-2003 in Guangzhou, southern China. *Helicobacter* 2007;12:164-9.
  13. Cheng H, Hu F, Zhang L, et al. Prevalence of *Helicobacter pylori* infection and identification of risk factors in rural and urban Beijing, China. *Helicobacter* 2009;14:128-33.
  14. Nie XR, Zhou T, Pan KF, et al. The associations of serum gastrin level with *Helicobacter pylori* infection. *Zhonghua Yu Fang Yi Xue Za Zhi* 2007;41 Suppl:87-9.
  15. Luo Jinbin, Zhou Li, Chen Xiaoqin, et al. Influence of *Helicobacter Pylori* infection among Buyi and Han nationalities. *Medical Journal of West China* 2010;22:901-903.
  16. Suo Rina ZS. An investigation on the infection status of *helicobacter pylori* in Chifeng of Inner Mongolia. *Journal of Clinical*



- Medicine in Practice 2011;15:120-122.
17. Zhu Xuxing, Hong Xiaofei, Wu Shenbao, et al. Epidemiological investigation of Helicobacter pylori infection in Yiwu, Zhejiang Province. Modern practical medicine 2011;23:619-621.
  18. Zhou hanqiao, Xiangming F. Analysis of Helicobacter pylori infection among permanent residents in Wuhan. Journal of Microcirculation 2009;19:36-37+40+132+136.
  19. Zeng Fanling, Lin X. Seroepidemiological investigation of Helicobacter pylori infection among physical examination population in Chongqing City. journal of chongqing medical university 2009;34:224-225.
  20. Zhou Ji, Yang Qingqiang, Changzhi L. Clinical analysis of 4000 cases of Helicobacter pylori infection by gastroscopy in Guangyuan City. Sichuan medicine journal 2010;31:1644-1645.
  21. Guo Xinwen, Wang Juan, Feng Hui, et al. Epidemiological survey of Helicobacter pylori infection in Uygur and Han nationality natural population in Aksu Area of Xinjiang. Journal of Xinjiang Medical University 2009;32:728-730.
  22. Linghua Z. Epidemiological investigation of Helicobacter pylori infection in Wuwei City, Gansu Province: Lanzhou University, 2009.
  23. Lao Xianbin, Chen Youming, Chunchang Q. Seroepidemiological investigation of Helicobacter pylori infection among

- telecom employees in two different areas of Guangdong Province. *Journal of tropical medicine* 2008;142-144.
24. Zheng Yansong, Chen Zhilai, Sai Xiaoyong, et al. Cross-sectional analysis of *Helicobacter pylori* infection in physical examination population. *Chinese Journal of Clinician* 2013;7:10044-10047.
  25. Xiaofang C. Analysis of *Helicobacter pylori* infection in healthy patients undergoing physical examination in Bao 'an District of Shenzhen City. *Journal of Chengdu Medical College* 2012;7:460-461.
  26. Liu Shuo, Xin Ying, Ma Caixia, et al. Detection and analysis of serum urease antibody of *Helicobacter pylori* among healthy people in Tai 'an area. *Journal of practical medicine* 2015;32:83-85.
  27. Yang Long, Zhou Li, Zhang Yonghong, et al. Epidemiological investigation and multi-factor analysis of *Helicobacter pylori* among Buyi, Miao and Han people in Zhenning County, Guizhou Province. *Journal of Gastroenterology and Hepatology* 2009;18:131-134.
  28. Huang Ronggen, Zhu Haixing, Huang Biao, et al. Investigation on *Helicobacter pylori* infection among people undergoing physical examination in Wuxi area. *Jiangsu Medical Journal* 2015;41:1412-1414.
  29. Kong X, Xu D, Li F, et al. Association of *H. pylori* infection with chronic kidney disease among Chinese adults. *Int Urol Nephrol* 2017;49:845-850.

30. Liu Menghui, Zhang Chi, Liang Xiaofeng, et al. Analysis of Helicobacter pylori infection in 11096 patients undergoing physical examination. Tianjin Medical Journal 2016;44:110-113.
31. Zhang Minglei, Guan Huixia, Yuning C. Epidemiological investigation of 1237 cases of Helicobacter pylori. journal of Chinese convalescent medicine 2013;22:680-681.
32. Jiang Fengquan, He Zhenyan, Lu Xiaoyu, et al. Investigation and analysis of Helicobacter pylori infection among healthy people in Dalian City. Journal of Dalian Medical University 2015;37:182-185.
33. Ligang W. Investigation on Helicobacter pylori infection status and related factors among employees of Dalian Port Group: Dalian Medical University, 2011.
34. Zhang Yanbo, Li Xiaou, Yan L. Analysis of Helicobacter pylori infection among medical staff in a hospital in Jilin. Chinese health industry 2016;13:73-75.
35. Shen Shien, Bi Qihua, Huanqin Z. Investigation and analysis of Helicobacter pylori infection among physical examination population in Hangzhou area. Chinese Journal of Health Inspection 2014;24:1642-1643.
36. Yang Yimai, Endian Z. Investigation on Helicobacter pylori infection among 15817 physical examination subjects in Wenzhou City. Zhejiang Journal of Integrated Chinese and Western Medicine 2015;25:801-803.

37. Zhu Qinfang, Yu Qian, Zhao Xing, et al. Investigation on Helicobacter pylori infection among healthy people in Suzhou area. *Laboratory medicine and clinic* 2012;9:2269-2270.
38. Cheng Zhiling, Tiantian C. Investigation and analysis of Helicobacter pylori infection and its related factors in Wuhan civil servants. *Chinese Journal of nosocomiology* 2012;22:3068-3070.
39. Yang Wenrong, Yue L. Investigation on Helicobacter pylori infection among 1714 policemen in Hainan Island. *Chinese tropical medicine* 2011;11:1257+1264.
40. Deng Xuejie, Qu Xiaoying, Xiang Lin, et al. Epidemiological trend of Helicobacter pylori infection in urban physical examination population in Chongqing for 3 years. *Chinese experimental diagnostics* 2011;15:2055-2057.
41. Li Lin, Li Duofu, Wei T. Investigation and analysis of urease antibody against Helicobacter pylori among urban residents in Nanchong City. *medical information journal* 2013:259-259.
42. Tang Huairong, Fan Yunjie, Sha L. Analysis of Helicobacter pylori infection status and related influencing factors in Chengdu area. *Journal of Sichuan University (Medical Edition)* 2014;45:823-826.
43. Cao Weimin, Han Tao, Hongwei P. Seroepidemiological analysis of Helicobacter pylori infection in physical examination population in Wujiaqu, Xinjiang. *Chinese contemporary medicine* 2013;20:2.

44. Zhenfang D, Gao Qi, Bingchang Z. Investigation on Helicobacter pylori infection among healthy people in Jinan City. Chinese Journal of Health Inspection 2016;26:3603-3604.
45. Tian Yuan, Cui Xianmin, Qi Sainan, et al. Analysis of Helicobacter pylori infection in physical examination population outside Yongding Gate in Beijing from 2013 to 2014. China Medical Guide 2016;13:189-192.
46. Cao Cong, Zhou Xihan, Hu Gaoyu, et al. Analysis of Helicobacter pylori infection in Dian-Qian-Guangxi border area. Journal of practical medicine 2017;33:1864-1867.
47. Liu Fuchang, Fu Yingyuan, Chen Huoling, et al. Serological analysis of Helicobacter pylori infection among blood donors in Nanchang area. China Medical Guide 2013;10:116-119.
48. Liu Donglin, Hu Jianfang, Zhaohan W. Investigation on Helicobacter pylori infection among healthy people in Nanchang City. Journal of Nanchang University (Medical Science) 2016;56:73-74.
49. Guo Xiaoyan, Wang Ting, Dong Lei, et al. Epidemiological survey of Helicobacter pylori infection in rural population in southern and northern Shaanxi Province. Journal of Hainan Medical College 2013;19:1431-1433+1437.
50. Chen Fei, Tang Haozhou, Miaoxing J. Investigation and analysis of Helicobacter pylori infection rate among healthy persons in Shanghai area. Chinese General Practice 2013;16:3464-3466.

51. Jia Demei, Wang Qiang, Chu Nanjiang, et al. Epidemiological investigation and correlative factors analysis of Helicobacter pylori infection among healthy adults in Yunnan Plateau area. *Chongqing Medical Journal* 2018;47:950-956.
52. Xu C, Yan M, Sun Y, et al. Prevalence of Helicobacter pylori infection and its relation with body mass index in a Chinese population. *Helicobacter* 2014;19:437-42.
53. Zhu Y, Zhou X, Wu J, et al. Risk Factors and Prevalence of Helicobacter pylori Infection in Persistent High Incidence Area of Gastric Carcinoma in Yangzhong City. *Gastroenterol Res Pract* 2014;2014:481365.
54. Fan N, Peng L, Xia Z, et al. Helicobacter pylori Infection Is Not Associated with Non-alcoholic Fatty Liver Disease: A Cross-Sectional Study in China. *Front Microbiol* 2018;9:73.
55. Xu MY, Cao B, Yuan BS, et al. Association of anaemia with Helicobacter pylori infection: a retrospective study. *Sci Rep* 2017;7:13434.
56. Gao Yiyun, Chuangui L. Cross-sectional analysis of Helicobacter pylori infection among healthy people in Junan District of Shunde from 2010 to 2016. *Chinese medical innovation* 2017;14:55-58.
57. Wu Jianjun, Ying Mingzhong, Cao Xiutang, et al. Analysis of Helicobacter pylori infection in physical examination population. *Journal of Intractable Diseases* 2014;13:1118-1122.

58. Meng Yaping, Ruming H. Analysis of Helicobacter pylori infection in healthy population. Modern Chinese doctor 2015;53:70-72.
59. Yiheng M. Epidemiological analysis of Helicobacter pylori in healthy physical examination subjects. medical information journal 2015:101-101,102.
60. Yan Huafang, Xiaoying S. Analysis of Helicobacter pylori infection in 1507 patients who underwent physical examination from 2009 to 2012. Henan Medical Research 2013;22:940-942.
61. Yang Chenghai, Wu Zhenghua, Zanxiong C. Analysis of Helicobacter pylori detection results in 4615 cases. International Medical and Health Review 2013;19:3415-3417.
62. Chen Xiaohua, Li Yuhua, Ren Ke, et al. Investigation on Helicobacter pylori infection in healthy population. Chinese practical medicine journal 2011;6:254-255.
63. Xie Tao, Li Wenhua, Shanshan C. Investigation and analysis of Helicobacter pylori infection in healthy population. Chinese and foreign medical research 2014;12:75-76.
64. Zhou Kelun, Zheng Y. Epidemiological survey of Helicobacter pylori infection in rural natural population in Penglai City. Clinical Journal of Chinese Medicine 2015;7:126-127.

65. Li Jing, Yuan yuan, Huang Yu, et al. Investigation and analysis of Helicobacter pylori infection rate in healthy population. Journal of Bengbu Medical College 2012;37:1341-1342.
66. Kong Dezhi, Xian P. Investigation and analysis of Hp infection in civil servants and public institutions. Primary medical forum 2013;17:4090-4092.
67. Zhou Ying, Ma Jian, Zhigang H. Epidemiological investigation of serum Helicobacter pylori urease antibody in healthy physical examination personnel. Chinese Journal of nosocomiology 2014;24:5867-5868+5871.
68. Gao Liping, Zhang Yaohua, Hongqi Z. Investigation on Helicobacter pylori infection among healthy adults in Zhoukou area in 2010. Chinese Journal of Medicine 2010;12:2135-2136.
69. Yu Xiaohui, Zhao Hongzhen, Li Xiaoyun, et al. Investigation on Helicobacter pylori infection among healthy people in Lanzhou. Chinese Journal of Gastroenterology 2016;21:687-689.
70. Qian Ming, Yuan Junjun, Yayuan L. Analysis of Helicobacter pylori infection in 2840 patients in Zhuhai City. Laboratory medicine and clinic 2011;8:2709-2710.
71. Wang Tao, Wang Yapeng, Ren Yuying, et al. Investigation and analysis of Helicobacter pylori infection among Kirgiz population in Aheqi County, Xinjiang. Chinese experimental diagnostics 2014;18:603-604.



72. Kong Dezhi, Zhu Dairong, Weiyue L. Epidemiological survey of Helicobacter pylori infection in Gelao nationality. Primary medical forum 2012;16:2043-2045.
73. Tu Jiayin, Chen Zhiping, Cao Weipeng, et al. Epidemiological investigation of Helicobacter pylori in healthy subjects in Lanzhou City. Clinical meta-analysis journal 2012;27:1754-1756.
74. Wang Feng, Yao Panpan, Yao Fangfang, et al. Investigation and analysis of Helicobacter pylori infection and serum pepsinogen I/II levels in physical examination population in Ningbo area. Journal of medical research 2014;43:98-101.
75. Gong Jinfa, Dong Yuanyuan, Zhang Yi, et al. Analysis of 1960 cases of Helicobacter pylori infection in seafarers in Shanghai. Journal of Shanghai Jiao Tong University (Medical Science) 2017;37:102-105.
76. Xia Y, Meng G, Zhang Q, et al. Dietary Patterns are Associated with Helicobacter Pylori Infection in Chinese Adults: A Cross-Sectional Study. Sci Rep 2016;6:32334.
77. Shan JH, Bai XJ, Han LL, et al. Changes with aging in gastric biomarkers levels and in biochemical factors associated with Helicobacter pylori infection in asymptomatic Chinese population. World J Gastroenterol 2017;23:5945-5953.
78. Liu Yang, Wang Jing, Xing Ruiqing, et al. Investigation of Helicobacter pylori infection in healthy adults and analysis of related factors in Xi 'an Journal of modern Laboratory Medicine 2012;27:79-82,85.

79. Pan KF, Zhang L, Gerhard M, et al. A large randomised controlled intervention trial to prevent gastric cancer by eradication of *Helicobacter pylori* in Linqiu County, China: baseline results and factors affecting the eradication. *Gut* 2016;65:9-18.
80. Liu J, Wang Y, Zhao Q, et al. Prevalence and risk factors for *Helicobacter pylori* infection in southwest China: a study of health examination participants based on 13C-urea breath test. *Turk J Med Sci* 2017;47:1456-1462.
81. Qu Zhujun, Bai Xuesong, Chen Lihua, et al. Investigation of *Helicobacter pylori* infection in healthy population. *Chinese Journal of Gerontology* 2017;36:214-218.
82. Nuer AHMAY. *Helicobacter pylori* infection in healthy Uygur and Han populations in Xinjiang. *Journal of tropical medicine* 2017;17.
83. Ji Na, Yanan G. Analysis of *Helicobacter pylori* test results in 4214 healthy subjects. *Marker immunoassay and clinical analysis* 2016;23:303-305.
84. Shao Nan, Lihong Z. Investigation and analysis of *Helicobacter pylori* infection among healthy people in a physical examination center in Shenyang. *Journal of Clinical Military Medicine* 2016;44:741-742.
85. Pan Fei, Xu Wen, Bai Wenli, et al. Analysis of *Helicobacter pylori* infection in healthy subjects in Jiangsu Province. *Chinese Electronic Journal of Clinical Laboratory Management* 2017;5:183-185.

86. Li Hua, Zhang Zhongfu, Lu Ren, et al. Investigation of Helicobacter pylori infection among physical examination population in Hangzhou area. Chinese Journal of nosocomiology 2016;26:2036-2037+2040.
87. Jia Mingfang, Luo Xiaohong, Wang Junlan, et al. Analysis of Helicobacter pylori infection status and risk factors in 2180 Wuhan residents. Journal of Nursing 2016;23:48-52.
88. Zhang Xiaohui, Chen Honghua, Guang Y. Analysis of Helicobacter pylori infection in healthy population. Chinese Journal of Social Medicine 2017;34:313-315.
89. Ma Zhichao, Ruan Heqiu, Huang Baili, et al. Analysis of Helicobacter pylori detection results in healthy physical examination subjects in Haikou Primary health care in China 2015;29:150-151.
90. Qin Hongwei, Cui Haitao, Yin Ruilan, et al. Investigation on Helicobacter pylori infection in Jiaozhou District of Qingdao. Journal of Chinese Minkang Medicine 2017;29:69-70+80.
91. Wu Xuehong, Wang Liyan, Shengbing L. Investigation on Helicobacter pylori infection and its influencing factors among 2860 physical examiners in Jiaxing area. Journal of Health Studies 2019;39:21-24.
92. Su Chengming, Shao Fuling, Bingxin S. Analysis of Helicobacter pylori infection in health examination of a population. Air force medical journal 2018;34:69-70.

93. Xu Zhen, Bing Y. Analysis of the correlation between helicobacter pylori infection and dyslipidemia in 2956 healthy subjects. *Journal of World compound medicine* 2018;4:34-36+92.
94. Wang Dan, Luo Hanzi, Wang Na, et al. Analysis of Helicobacter pylori detection results among healthy people in Jiujiang area of Jiangxi. *Journal of Southeast defense medicine* 2017;19:592-594.
95. Lirong M. Investigation on Helicobacter pylori infection and related factors in Wuzhong area of Ningxia: Ningxia Medical University, 2019.
96. Lu W. Investigation on the correlation between Helicobacter pylori infection and non-alcoholic fatty liver disease among physical examination population in Taiyuan: Shanxi Medical University, 2016.
97. Sun Huixiang, Zou Zhen, Huang Yueping, et al. Epidemiological investigation of Helicobacter pylori infection in a suburban community in Shanghai. *Shanghai Preventive Medicine* 2018;30:295-298.
98. Qu Zheng, Wu Min, Wang Zhuo, et al. Status and influencing factors of Helicobacter pylori infection in adults in Baoshan District of Shanghai. *journal of public health and preventive medicine* 2018;29:108-111.
99. Cai Ling, Yi Biranhen, Zhang Mei, et al. Epidemiological investigation of Helicobacter pylori infection in natural population in Lhasa. *Chinese Journal of Digestion* 2018;38:2-6.

100. Shu L, Zheng PF, Zhang XY, et al. Dietary patterns and Helicobacter pylori infection in a group of Chinese adults ages between 45 and 59 years old: An observational study. *Medicine (Baltimore)* 2019;98:e14113.
101. Gu Y, Zheng L, Kumari S, et al. The relationship between Helicobacter pylori infection and depressive symptoms in the general population in China: The TCLSIH cohort study. *Helicobacter* 2019;24:e12632.
102. Xie S, Wang S, Xue L, et al. Helicobacter pylori Is Associated With Precancerous and Cancerous Lesions of the Gastric Cardia Mucosa: Results of a Large Population-Based Study in China. *Front Oncol* 2020;10:205.
103. Li Yun, Liu Juhua, Tian Weike, et al. Analysis of Helicobacter pylori infection and its correlation with risk factors of arteriosclerosis in 33153 patients in Nanchong. *Journal of China Medical Guide* 2020;17:53-56.
104. Shuai Xuejun, Li Mu, Chen Gang, et al. Analysis of related factors in physical examination screening for Helicobacter pylori infection. *Journal of China-Japan Friendship Hospital* 2020;34:195-198.
105. Guo Cheng, Xiang Yang, Chen Min, et al. Investigation on Helicobacter pylori infection in outpatient and physical examination population in Jiashou. *Journal of Modern digestive and interventional therapy* 2019;24:969-971+976.
106. Piaoxian X. Significance evaluation and clinical analysis of Helicobacter pylori detection in physical examination. *Journal of China Foreign Medical Treatment* 2017;36:76-78.

107. Yang Lin, Kang Lesiji, Jiang Hua, et al. Epidemiological survey of Helicobacter pylori infection in Tibetan population in Aba Prefecture and analysis of related influencing factors. *Journal of Practical Hospital Clinical* 2019;16:18-20.
108. Guo Ying, Pei Dongmei, Naisi Z. Investigation and analysis of Helicobacter pylori infection in Shenyang. *Journal of Practical Clinical Medicine* 2019;23:99-101+105.
109. Wei Wenzhi, Liu Yanru, Wen Xiaohua, et al. Relationship between Helicobacter pylori infection and hyperhomocysteinemia in healthy population. *Chinese Journal of Health Medicine* 2018;20:7-9.
110. Fu Hongxia, Zhu Qinghong, Kang Min, et al. Two methods were used to detect Helicobacter pylori infection among healthy people in Shiyao. *Journal of Marker immunoassay and clinical analysis* 2018;25:939-941+976.
111. Han Yugang, Cui Yunpeng, Li Jing, et al. Study on Helicobacter pylori infection and its immune typing in natural population in Jinan. *Journal of Laboratory medicine and clinic* 2020;17:630-632.
112. Xu Wenjiao, Li Changping, Lei S. Study on Helicobacter pylori infection status and risk factors in physical examination population in Luzhou. *Journal of practical medicine* 2019;35:649-653.
113. Yan Y, Chen YN, Zhao Q, et al. Helicobacter pylori infection with intestinal metaplasia: An independent risk factor for colorectal adenomas. *World J Gastroenterol* 2017;23:1443-1449.

114. Ying C. Investigation and analysis of Helicobacter pylori infection in healthy people during physical examination. Chinese contemporary medicine journal 2017;24:162-164.
115. Hu Liu, Wan Zhengce, Lv Yongman, et al. Correlation between Helicobacter pylori infection and serum bilirubin. Chinese Journal of Gastroenterology 2019;24:30-34.
116. Zhang J, Chen Y, Chen W, et al. Persistent infection of Helicobacter pylori affects weight loss in obese population compared with persistent negative: A case-control study based on healthy Chinese. Helicobacter 2020;25:e12697.

Supplementary Table 3. Quality assessment of included *H. pylori* infection studies

| Author, Publication             | Study design | Sampling frame | Sample size | Outcome measures | Unbiased assessors | Response rate | Result interpretation | Applicability | Total* |
|---------------------------------|--------------|----------------|-------------|------------------|--------------------|---------------|-----------------------|---------------|--------|
| Ma et al, 2005 <sup>1</sup>     | 1            | 1              | 1           | 1                | 1                  | 0             | 1                     | 1             | 7      |
| Brown et al, 2001 <sup>2</sup>  | 1            | 1              | 1           | 1                | 1                  | 0             | 1                     | 1             | 7      |
| Groves et al, 2002 <sup>3</sup> | 1            | 1              | 1           | 1                | 1                  | 0             | 1                     | 1             | 7      |
| Wong et al, 1999 <sup>4</sup>   | 1            | 1              | 1           | 1                | 1                  | 0             | 0                     | 1             | 6      |
| Jiang et al, 1996 <sup>5</sup>  | 1            | 1              | 0           | 1                | 1                  | 0             | 0                     | 1             | 5      |
| Zhai et al, 1994 <sup>6</sup>   | 1            | 0              | 1           | 1                | 1                  | 0             | 0                     | 0             | 4      |
| Wang et al, 1996 <sup>7</sup>   | 1            | 0              | 1           | 1                | 1                  | 0             | 0                     | 0             | 4      |
| He et al, 2001 <sup>8</sup>     | 1            | 1              | 1           | 1                | 1                  | 0             | 0                     | 1             | 6      |
| Fan et al, 2004 <sup>9</sup>    | 1            | 1              | 0           | 1                | 1                  | 0             | 0                     | 1             | 5      |
| Chen et al, 2003 <sup>10</sup>  | 1            | 1              | 1           | 1                | 1                  | 1             | 0                     | 1             | 7      |
| Shi et al, 2008 <sup>11</sup>   | 1            | 1              | 1           | 1                | 1                  | 1             | 0                     | 1             | 7      |
| Chen et al, 2007 <sup>12</sup>  | 1            | 1              | 1           | 1                | 1                  | 0             | 0                     | 1             | 6      |
| Cheng et al, 2009 <sup>13</sup> | 1            | 1              | 1           | 1                | 1                  | 0             | 0                     | 1             | 6      |
| Nie et al, 2007 <sup>14</sup>   | 1            | 1              | 0           | 1                | 1                  | 0             | 0                     | 1             | 5      |
| Luo et al, 2010 <sup>15</sup>   | 1            | 1              | 1           | 1                | 1                  | 0             | 0                     | 1             | 6      |
| Suo et al, 2011 <sup>16</sup>   | 1            | 1              | 1           | 1                | 1                  | 0             | 0                     | 1             | 6      |
| Zhu et al, 2011 <sup>17</sup>   | 1            | 1              | 1           | 1                | 1                  | 0             | 0                     | 1             | 6      |
| Zhou et al, 2005 <sup>18</sup>  | 1            | 1              | 1           | 1                | 1                  | 0             | 0                     | 1             | 6      |
| Zeng et al, 2008 <sup>19</sup>  | 1            | 1              | 1           | 1                | 1                  | 0             | 0                     | 1             | 6      |
| Zhou et al, 2010 <sup>20</sup>  | 1            | 0              | 1           | 1                | 1                  | 0             | 0                     | 0             | 4      |
| Guo et al, 2006 <sup>21</sup>   | 1            | 1              | 1           | 1                | 1                  | 0             | 0                     | 1             | 6      |
| Zhang et al, 2009 <sup>22</sup> | 1            | 1              | 1           | 1                | 1                  | 0             | 0                     | 1             | 6      |
| Lao et al, 2008 <sup>23</sup>   | 1            | 0              | 1           | 1                | 1                  | 0             | 0                     | 1             | 5      |
| Zheng et al, 2013 <sup>24</sup> | 1            | 1              | 1           | 1                | 1                  | 0             | 0                     | 1             | 6      |



|                                 |   |   |   |   |   |   |   |   |   |
|---------------------------------|---|---|---|---|---|---|---|---|---|
| Chen et al, 2012 <sup>25</sup>  | 1 | 1 | 1 | 1 | 1 | 0 | 0 | 1 | 6 |
| Liu et al, 2015 <sup>26</sup>   | 1 | 1 | 1 | 1 | 1 | 0 | 0 | 1 | 6 |
| Yang et al, 2009 <sup>27</sup>  | 1 | 0 | 1 | 1 | 1 | 0 | 0 | 1 | 5 |
| Huang et al, 2015 <sup>28</sup> | 1 | 1 | 1 | 1 | 1 | 0 | 0 | 1 | 6 |
| Kong et al, 2017 <sup>29</sup>  | 1 | 1 | 1 | 1 | 1 | 0 | 1 | 1 | 7 |
| Li et al, 2016 <sup>30</sup>    | 1 | 1 | 1 | 1 | 1 | 0 | 0 | 1 | 6 |
| Zhang et al, 2013 <sup>31</sup> | 1 | 0 | 1 | 1 | 1 | 0 | 0 | 1 | 5 |
| Jiang et al, 2015 <sup>32</sup> | 1 | 1 | 1 | 1 | 1 | 0 | 0 | 1 | 6 |
| Wang et al, 2011 <sup>33</sup>  | 1 | 1 | 1 | 1 | 1 | 0 | 0 | 1 | 6 |
| Zhang et al, 2016 <sup>34</sup> | 1 | 0 | 1 | 1 | 1 | 0 | 0 | 1 | 5 |
| Huang et al, 2015 <sup>28</sup> | 1 | 1 | 1 | 1 | 1 | 0 | 0 | 1 | 6 |
| Shen et al, 2014 <sup>35</sup>  | 1 | 1 | 1 | 1 | 1 | 0 | 0 | 1 | 6 |
| Yang et al, 2015 <sup>36</sup>  | 1 | 1 | 1 | 1 | 1 | 0 | 0 | 1 | 6 |
| Zhu et al, 2012 <sup>37</sup>   | 1 | 1 | 1 | 1 | 1 | 0 | 0 | 1 | 6 |
| Cheng et al, 2012 <sup>38</sup> | 1 | 1 | 1 | 1 | 1 | 0 | 0 | 1 | 6 |
| Yang et al, 2011 <sup>39</sup>  | 1 | 0 | 1 | 1 | 1 | 0 | 0 | 1 | 5 |
| Deng et al, 2011 <sup>40</sup>  | 1 | 1 | 1 | 1 | 1 | 0 | 0 | 1 | 6 |
| Yang et al, 2015 <sup>36</sup>  | 1 | 1 | 1 | 1 | 1 | 0 | 0 | 1 | 6 |
| Li et al, 2013 <sup>41</sup>    | 1 | 1 | 1 | 1 | 1 | 0 | 0 | 1 | 6 |
| Tang et al, 2014 <sup>42</sup>  | 1 | 1 | 1 | 1 | 1 | 0 | 0 | 1 | 6 |
| Yang et al, 2011 <sup>39</sup>  | 1 | 0 | 1 | 1 | 1 | 0 | 0 | 1 | 5 |
| Cao et al, 2013 <sup>43</sup>   | 1 | 0 | 0 | 1 | 1 | 0 | 0 | 0 | 3 |
| Dong et al, 2016 <sup>44</sup>  | 1 | 1 | 1 | 1 | 1 | 0 | 0 | 1 | 6 |
| Liu et al, 2015 <sup>26</sup>   | 1 | 1 | 1 | 1 | 1 | 0 | 0 | 1 | 6 |
| Tian et al, 2016 <sup>45</sup>  | 1 | 1 | 1 | 1 | 1 | 0 | 0 | 1 | 6 |
| Cao et al, 2017 <sup>46</sup>   | 1 | 1 | 1 | 1 | 1 | 0 | 0 | 1 | 6 |
| Liu et al, 2013 <sup>47</sup>   | 1 | 1 | 1 | 1 | 1 | 0 | 0 | 1 | 6 |
| Liu et al, 2016 <sup>48</sup>   | 1 | 1 | 1 | 1 | 1 | 0 | 0 | 1 | 6 |

|                                 |   |   |   |   |   |   |   |   |   |
|---------------------------------|---|---|---|---|---|---|---|---|---|
| Guo et al, 2013 <sup>49</sup>   | 1 | 1 | 1 | 1 | 1 | 0 | 0 | 1 | 6 |
| Zhang et al, 2013 <sup>31</sup> | 1 | 0 | 1 | 1 | 1 | 0 | 0 | 1 | 5 |
| Chen et al, 2013 <sup>50</sup>  | 1 | 1 | 1 | 1 | 1 | 0 | 0 | 1 | 6 |
| Jia et al, 2018 <sup>51</sup>   | 1 | 1 | 1 | 1 | 1 | 0 | 1 | 1 | 7 |
| Xu et al, 2014 <sup>52</sup>    | 1 | 1 | 1 | 1 | 1 | 0 | 0 | 1 | 6 |
| Zhu et al, 2014 <sup>53</sup>   | 1 | 1 | 1 | 1 | 1 | 0 | 0 | 1 | 6 |
| Fan et al, 2018 <sup>54</sup>   | 1 | 1 | 1 | 1 | 1 | 0 | 0 | 1 | 6 |
| Xu et al, 2017 <sup>55</sup>    | 1 | 1 | 1 | 1 | 1 | 0 | 0 | 1 | 6 |
| Gao et al, 2017 <sup>56</sup>   | 1 | 1 | 1 | 1 | 1 | 0 | 0 | 1 | 6 |
| Wu et al, 2014 <sup>57</sup>    | 1 | 1 | 1 | 1 | 1 | 0 | 0 | 1 | 6 |
| Meng et al, 2015 <sup>58</sup>  | 1 | 1 | 1 | 1 | 1 | 0 | 0 | 1 | 6 |
| Mao et al, 2015 <sup>59</sup>   | 1 | 1 | 1 | 1 | 1 | 0 | 0 | 1 | 6 |
| Yan et al, 2013 <sup>60</sup>   | 1 | 1 | 1 | 1 | 1 | 0 | 0 | 1 | 6 |
| Yang et al, 2013 <sup>61</sup>  | 1 | 1 | 1 | 1 | 1 | 0 | 0 | 1 | 6 |
| Chen et al, 2011 <sup>62</sup>  | 1 | 1 | 1 | 1 | 1 | 0 | 0 | 1 | 6 |
| Xie et al, 2014 <sup>63</sup>   | 1 | 1 | 1 | 1 | 1 | 0 | 0 | 1 | 6 |
| Zhou et al, 2015 <sup>64</sup>  | 1 | 1 | 1 | 1 | 1 | 0 | 0 | 1 | 6 |
| Li et al, 2012 <sup>65</sup>    | 1 | 1 | 1 | 1 | 1 | 0 | 0 | 1 | 6 |
| Kong et al, 2013 <sup>66</sup>  | 1 | 0 | 1 | 1 | 1 | 0 | 0 | 0 | 4 |
| Zhou et al, 2014 <sup>67</sup>  | 1 | 1 | 1 | 1 | 1 | 0 | 0 | 1 | 6 |
| Gao et al, 2010 <sup>68</sup>   | 1 | 1 | 1 | 1 | 1 | 0 | 0 | 1 | 6 |
| Yu et al, 2016 <sup>69</sup>    | 1 | 1 | 1 | 1 | 1 | 0 | 0 | 1 | 6 |
| Qian et al, 2011 <sup>70</sup>  | 1 | 1 | 1 | 1 | 1 | 0 | 0 | 1 | 6 |
| Zhang et al, 2016 <sup>34</sup> | 1 | 0 | 1 | 1 | 1 | 0 | 0 | 1 | 5 |
| Wang et al, 2014 <sup>71</sup>  | 1 | 1 | 1 | 1 | 1 | 0 | 0 | 1 | 6 |
| Kong et al, 2012 <sup>72</sup>  | 1 | 1 | 1 | 1 | 1 | 0 | 0 | 1 | 6 |
| Tu et al, 2012 <sup>73</sup>    | 1 | 1 | 1 | 1 | 1 | 0 | 0 | 1 | 6 |
| Wang et al, 2014 <sup>74</sup>  | 1 | 1 | 1 | 1 | 1 | 0 | 0 | 1 | 6 |

|                                       |   |   |   |   |   |   |   |   |   |
|---------------------------------------|---|---|---|---|---|---|---|---|---|
| Li et al, 2012 <sup>65</sup>          | 1 | 1 | 0 | 1 | 1 | 0 | 0 | 1 | 5 |
| Gong et al, 2017 <sup>75</sup>        | 1 | 0 | 1 | 1 | 1 | 0 | 0 | 0 | 4 |
| Xia et al, 2016 <sup>76</sup>         | 1 | 1 | 1 | 1 | 1 | 0 | 1 | 1 | 7 |
| Shan et al, 2017 <sup>77</sup>        | 1 | 1 | 1 | 1 | 1 | 0 | 0 | 1 | 6 |
| Liu et al, 2012 <sup>78</sup>         | 1 | 1 | 1 | 1 | 1 | 0 | 0 | 1 | 6 |
| Pan et al, 2016 <sup>79</sup>         | 1 | 1 | 1 | 1 | 1 | 1 | 1 | 1 | 8 |
| Liu et al, 2017 <sup>80</sup>         | 1 | 1 | 1 | 1 | 1 | 0 | 0 | 1 | 6 |
| Qu et al, 2017 <sup>81</sup>          | 1 | 1 | 1 | 1 | 1 | 0 | 0 | 1 | 6 |
| Ayiner A et al,<br>2017 <sup>82</sup> | 1 | 1 | 1 | 1 | 1 | 0 | 0 | 1 | 6 |
| Ji et al, 2016 <sup>83</sup>          | 1 | 1 | 1 | 1 | 1 | 0 | 0 | 1 | 6 |
| Shao et al, 2016 <sup>84</sup>        | 1 | 1 | 1 | 1 | 1 | 0 | 0 | 1 | 6 |
| Pan et al, 2017 <sup>85</sup>         | 1 | 1 | 1 | 1 | 1 | 0 | 0 | 1 | 6 |
| Li et al, 2016 <sup>86</sup>          | 1 | 1 | 1 | 1 | 1 | 0 | 0 | 1 | 6 |
| Jia et al, 2016 <sup>87</sup>         | 1 | 1 | 1 | 1 | 1 | 0 | 0 | 1 | 6 |
| Zhang et al, 2017 <sup>88</sup>       | 1 | 1 | 1 | 1 | 1 | 0 | 0 | 1 | 6 |
| Ma et al, 2015 <sup>89</sup>          | 1 | 1 | 1 | 1 | 1 | 0 | 0 | 1 | 6 |
| Qin et al, 2017 <sup>90</sup>         | 1 | 1 | 1 | 1 | 1 | 0 | 0 | 1 | 6 |
| Wu et al, 2019 <sup>91</sup>          | 1 | 1 | 1 | 1 | 1 | 0 | 1 | 1 | 7 |
| Su et al, 2018 <sup>92</sup>          | 1 | 1 | 1 | 1 | 1 | 0 | 0 | 1 | 6 |
| Xu et al, 2015 <sup>93</sup>          | 1 | 1 | 1 | 1 | 1 | 0 | 0 | 1 | 6 |
| Wang et al, 2017 <sup>94</sup>        | 1 | 1 | 1 | 1 | 1 | 0 | 0 | 1 | 6 |
| Mo et al, 2019 <sup>95</sup>          | 1 | 0 | 1 | 1 | 1 | 0 | 0 | 0 | 4 |
| Wang et al, 2016 <sup>96</sup>        | 1 | 1 | 1 | 1 | 1 | 0 | 0 | 1 | 6 |
| Wang et al, 2017 <sup>94</sup>        | 1 | 1 | 1 | 1 | 1 | 0 | 0 | 1 | 6 |
| Zhang et al, 2017 <sup>88</sup>       | 1 | 1 | 1 | 1 | 1 | 0 | 0 | 1 | 6 |
| Ma et al, 2015 <sup>89</sup>          | 1 | 1 | 1 | 1 | 1 | 0 | 0 | 1 | 6 |
| Sun et al, 2018 <sup>97</sup>         | 1 | 1 | 1 | 1 | 1 | 0 | 1 | 1 | 7 |

|                                  |   |   |   |   |   |   |   |   |   |
|----------------------------------|---|---|---|---|---|---|---|---|---|
| Qu et al, 2018 <sup>98</sup>     | 1 | 1 | 1 | 1 | 1 | 0 | 1 | 1 | 7 |
| Cai et al, 2018 <sup>99</sup>    | 1 | 1 | 1 | 1 | 1 | 0 | 1 | 1 | 7 |
| Shu et al, 2019 <sup>100</sup>   | 1 | 1 | 1 | 1 | 1 | 0 | 0 | 1 | 6 |
| Wang et al, 2017 <sup>94</sup>   | 1 | 1 | 1 | 1 | 1 | 0 | 0 | 1 | 6 |
| Gu et al, 2019 <sup>101</sup>    | 1 | 1 | 1 | 1 | 1 | 0 | 0 | 1 | 6 |
| Xie et al, 2019 <sup>102</sup>   | 1 | 1 | 1 | 1 | 1 | 0 | 0 | 1 | 6 |
| Li et al, 2020 <sup>103</sup>    | 1 | 1 | 1 | 1 | 1 | 0 | 0 | 1 | 6 |
| Shuai et al, 2020 <sup>104</sup> | 1 | 1 | 1 | 1 | 1 | 0 | 0 | 1 | 6 |
| Guo et al, 2019 <sup>105</sup>   | 1 | 1 | 1 | 1 | 1 | 0 | 0 | 1 | 6 |
| Xie et al, 2017 <sup>106</sup>   | 1 | 1 | 1 | 1 | 1 | 0 | 0 | 1 | 6 |
| Yang et al, 2019 <sup>107</sup>  | 1 | 1 | 1 | 1 | 1 | 0 | 0 | 0 | 5 |
| Guo et al, 2019 <sup>108</sup>   | 1 | 1 | 1 | 1 | 1 | 0 | 0 | 1 | 6 |
| Wei et al, 2018 <sup>109</sup>   | 1 | 1 | 1 | 1 | 1 | 0 | 0 | 1 | 6 |
| Fu et al, 2018 <sup>110</sup>    | 1 | 1 | 1 | 1 | 1 | 0 | 0 | 1 | 6 |
| Han et al, 2020 <sup>111</sup>   | 1 | 1 | 1 | 1 | 1 | 0 | 0 | 1 | 6 |
| Xu et al, 2019 <sup>112</sup>    | 1 | 1 | 1 | 1 | 1 | 0 | 0 | 1 | 6 |
| Wang et al, 2017 <sup>94</sup>   | 1 | 1 | 1 | 1 | 1 | 0 | 0 | 1 | 6 |
| Yan et al, 2017 <sup>113</sup>   | 1 | 1 | 1 | 1 | 1 | 0 | 1 | 1 | 7 |
| Cheng et al, 2017 <sup>114</sup> | 1 | 1 | 0 | 1 | 1 | 0 | 0 | 1 | 5 |
| Hu et al, 2019 <sup>115</sup>    | 1 | 1 | 1 | 1 | 1 | 0 | 0 | 1 | 6 |
| Zhang et al, 2020 <sup>116</sup> | 1 | 1 | 1 | 1 | 1 | 0 | 1 | 1 | 7 |

\*Scoring criteria for included studies

|                                                                                      |         |
|--------------------------------------------------------------------------------------|---------|
| Study design: Population-based sample                                                | 1 point |
| Sampling frame: Unbiased sampling frame (i.e. census data)                           | 1 point |
| Sample size: Adequate sample size (>300 subjects)                                    | 1 point |
| Outcome measures: Using objective, suitable and standard criteria to measure outcome | 1 point |
| Unbiased assessors: Outcomes measured by unbiased assessors                          | 1 point |

|                                                                                          |         |
|------------------------------------------------------------------------------------------|---------|
| Response rate: Adequate response rate ( $\geq 70\%$ )                                    | 1 point |
| Result interpretation: Results given with confidence intervals and in detail by subgroup | 1 point |
| Applicability: Study subjects described in detail                                        | 1 point |

Supplementary Table 4. Attributable cases of modifiable risk factors for CGC from 2000 to 2050

| Risk factor                    | Attributable cases (95% CIs) |                        |                         |                        |                        |                        |                        |                        |                        |                        |                        |
|--------------------------------|------------------------------|------------------------|-------------------------|------------------------|------------------------|------------------------|------------------------|------------------------|------------------------|------------------------|------------------------|
|                                | 2000                         | 2005                   | 2010                    | 2015                   | 2020                   | 2025                   | 2030                   | 2035                   | 2040                   | 2045                   | 2050                   |
| <b>Male</b>                    |                              |                        |                         |                        |                        |                        |                        |                        |                        |                        |                        |
| <i>H. pylori</i> <sup>a</sup>  | 59725<br>(32935,86514)       | 55601<br>(29966,81236) | 60700<br>(32157,89242)  | 55169<br>(27608,82730) | 51517<br>(24185,78850) | 50461<br>(22833,78090) | 48072<br>(21752,74393) | 44791<br>(20267,69315) | 40864<br>(18490,63237) | 37188<br>(16827,57549) | 33794<br>(15291,52296) |
| Smoking <sup>b</sup>           | 33947<br>(25060,42831)       | 30047<br>(21925,38169) | 31320<br>(22636,40001)  | 29663<br>(21394,37933) | 29488<br>(21279,37707) | 30186<br>(21805,38569) | 29194<br>(21089,37302) | 27509<br>(19872,35149) | 25331<br>(18298,32366) | 23190<br>(16752,29630) | 21081<br>(15228,26936) |
| Pickled vegetable <sup>c</sup> | 11074<br>(7332, 14813)       | 10344<br>(6876, 13844) | 9529<br>(6238, 12813)   | 8712<br>(5696,11727)   | 8647<br>(5654, 11641)  | 7569<br>(4911, 10224)  | 6924<br>(4493, 9353)   | 6262<br>(4063, 8458)   | 5574<br>(3617, 7529)   | 4994<br>(3240, 6746)   | 4411<br>(2762, 5959)   |
| Alcohol <sup>d</sup>           | 10092<br>(3948, 16238)       | 8459<br>(3241, 13672)  | 5086<br>(1821, 8351)    | 5129<br>(1845, 8415)   | 5690<br>(2067, 9317)   | 5012<br>(1793, 8224)   | 4312<br>(1542, 7076)   | 3729<br>(1334, 6120)   | 3201<br>(1145, 5253)   | 2805<br>(1003, 4603)   | 2406<br>(861, 3949)    |
| Unhealthy BMI <sup>e</sup>     | 6827<br>(543, 13111)         | 6909<br>(1127, 12692)  | 7852<br>(1283, 14422)   | 8392<br>(1376, 15407)  | 9401<br>(1719, 17082)  | 9783<br>(1173, 18392)  | 10451<br>(1253, 19649) | 10616<br>(1273, 19958) | 10410<br>(1248, 19572) | 9932<br>(1191, 18674)  | 9558<br>(1146, 17970)  |
| Diabetes <sup>f</sup>          | 445<br>(160, 734)            | 991<br>(344, 1641)     | 2219<br>(787, 3653)     | 2425<br>(863, 3981)    | 2329<br>(835, 3823)    | 2756<br>(989, 4520)    | 3798<br>(1362, 6228)   | 4712<br>(1690, 7726)   | 5496<br>(1971, 9012)   | 5927<br>(2126, 9718)   | 6805<br>(2441, 11159)  |
| All above                      | 82384<br>(56377,98857)       | 76885<br>(51577,93251) | 82689<br>(53949,102077) | 77723<br>(49208,96819) | 75810<br>(46842,95023) | 75574<br>(45512,95511) | 73697<br>(43992,93414) | 70053<br>(41533,88910) | 65112<br>(38380,82682) | 60068<br>(35268,76262) | 55742<br>(32561,70706) |
| <b>Female</b>                  |                              |                        |                         |                        |                        |                        |                        |                        |                        |                        |                        |
| <i>H. pylori</i>               | 18697<br>(10311,27084)       | 18129<br>(9770,26487)  | 18763<br>(9940,27586)   | 19985<br>(10001,29968) | 19521<br>(9164,29877)  | 19915<br>(9011,30819)  | 19920<br>(9013,30826)  | 19590<br>(8864,30315)  | 18730<br>(8475,28984)  | 17715<br>(8016,27413)  | 16151<br>(7308,24995)  |
| Smoking                        | 362<br>(110, 616)            | 288<br>(86, 489)       | 243<br>(73, 413)        | 222<br>(66,379)        | 204<br>(61, 349)       | 188<br>(56, 322)       | 163<br>(48, 279)       | 144<br>(43, 247)       | 127<br>(38, 217)       | 114<br>(34, 195)       | 97<br>(29, 166)        |
| Pickled vegetable              | 3633<br>(2412, 4854)         | 3525<br>(2338, 4712)   | 3029<br>(1987, 4072)    | 3235<br>(2118, 4354)   | 3359<br>(2199, 4520)   | 3023<br>(1964, 4082)   | 2889<br>(1877, 3901)   | 2747<br>(1785, 3710)   | 2555<br>(1660, 3450)   | 2374<br>(1543, 3207)   | 2115<br>(1374, 2857)   |

|                      |                          |                         |                          |                          |                         |                         |                         |                         |                         |                         |                         |
|----------------------|--------------------------|-------------------------|--------------------------|--------------------------|-------------------------|-------------------------|-------------------------|-------------------------|-------------------------|-------------------------|-------------------------|
| Alcohol              | 317<br>(107, 530)        | 244<br>(83, 406)        | 115<br>(35, 195)         | 145<br>(47, 242)         | 150<br>(49, 252)        | 133<br>(43, 223)        | 111<br>(36, 186)        | 96<br>(31, 161)         | 82<br>(27, 138)         | 73<br>(24, 123)         | 61<br>(20, 103)         |
| Unhealthy<br>BMI     | 2438<br>(303, 4572)      | 2493<br>(456, 4530)     | 2877<br>(591, 5163)      | 3399<br>(740, 6057)      | 3877<br>(910, 6844)     | 4256<br>(915, 7596)     | 4726<br>(1017, 8436)    | 5029<br>(1082, 8977)    | 5136<br>(1105, 9167)    | 5071<br>(1091, 9051)    | 4904<br>(1055, 8754)    |
| Diabetes             | 151<br>(53, 250)         | 360<br>(125, 594)       | 571<br>(202, 942)        | 800<br>(285, 1317)       | 771<br>(272, 1270)      | 940<br>(334, 1544)      | 1292<br>(459, 2121)     | 1622<br>(577, 2664)     | 1912<br>(680, 3139)     | 2086<br>(742, 3425)     | 2328<br>(828, 3822)     |
| All above            | 21543<br>(12342,28912)   | 21053<br>(11903,28403)  | 21721<br>(11962,29601)   | 23562<br>(12373,32575)   | 23592<br>(11804,33035)  | 24214<br>(11573,34333)  | 24689<br>(11693,35002)  | 24702<br>(11623,34999)  | 24017<br>(11241,33985)  | 23001<br>(10731,32509)  | 21380<br>(9932,30152)   |
| Both sex             |                          |                         |                          |                          |                         |                         |                         |                         |                         |                         |                         |
| <i>H. pylori</i>     | 78422<br>(43246,113598)  | 73730<br>(39737,107723) | 79463<br>(42098,116829)  | 75154<br>(37609,112698)  | 71038<br>(33349,108727) | 70377<br>(31844,108909) | 67992<br>(30765,105218) | 64381<br>(29131,99631)  | 59593<br>(26965,92222)  | 54902<br>(24842,84962)  | 49945<br>(22599,77291)  |
| Smoking              | 34310<br>(25170,43447)   | 30335<br>(22011,38658)  | 31563<br>(22709,40415)   | 29885<br>(21461,38313)   | 29693<br>(21340,38056)  | 30374<br>(21861,38891)  | 29357<br>(21137,37581)  | 27653<br>(19914,35396)  | 25458<br>(18336,32583)  | 23304<br>(16785,29825)  | 21178<br>(15257,27102)  |
| Pickled<br>vegetable | 14707<br>(9744, 19666)   | 13869<br>(9184, 18556)  | 12559<br>(8225, 16885)   | 11946<br>(7815, 16081)   | 12006<br>(7854, 16161)  | 10591<br>(6875, 14306)  | 9813<br>(6369, 13254)   | 9009<br>(5847, 12168)   | 8129<br>(5276, 10979)   | 7369<br>(4783, 9953)    | 6527<br>(4237, 8815)    |
| Alcohol              | 10409<br>(4054, 16768)   | 8703<br>(3323, 14078)   | 5201<br>(1856, 8545)     | 5274<br>(1892, 8658)     | 5840<br>(2116, 9569)    | 5144<br>(1836, 8447)    | 4423<br>(1578, 7263)    | 3825<br>(1365, 6280)    | 3284<br>(1172, 5392)    | 2878<br>(1027, 4726)    | 2467<br>(881, 4052)     |
| Unhealthy<br>BMI     | 9265<br>(846, 17683)     | 9402<br>(1582, 17222)   | 10729<br>(1873, 19585)   | 11790<br>(2116, 21464)   | 13278<br>(2629, 23926)  | 14038<br>(2088, 25988)  | 15177<br>(2270, 28085)  | 15645<br>(2355, 28935)  | 15545<br>(2353, 28738)  | 15003<br>(2282, 27725)  | 14462<br>(2201, 26724)  |
| Diabetes             | 596<br>(213, 984)        | 1351<br>(470, 2235)     | 2790<br>(988, 4594)      | 3225<br>(1148, 5298)     | 3100<br>(1107, 5093)    | 3697<br>(1323, 6063)    | 5090<br>(1822, 8348)    | 6334<br>(2267, 10390)   | 7408<br>(2651, 12150)   | 8013<br>(2868, 13143)   | 9133<br>(3269, 14981)   |
| All above            | 103928<br>(68719,127769) | 97938<br>(63481,121654) | 104410<br>(65911,131678) | 101285<br>(61581,129393) | 99403<br>(58646,128057) | 99788<br>(57085,129844) | 98385<br>(55684,128416) | 94755<br>(53156,123909) | 89129<br>(49622,116667) | 83069<br>(45999,108771) | 77122<br>(42493,100858) |

<sup>a</sup>The positive status of *H. pylori* infection as defined by enzyme-linked immunosorbent assay (ELISA),

immunoblotting or urea breath test (UBT).

<sup>b</sup>Currently smoking, accumulated up to 100 cigarettes, and still smoking.

<sup>b</sup>Exclude those who did not use or consumed pickled vegetable minimally.

<sup>d</sup>Regular alcohol consumption, drinking alcohol at least three times a week.

<sup>e</sup>Unhealthy BMI included underweight (BMI<18.5) and overweight/obesity (BMI > 25.0).

<sup>f</sup>The diabetes as defined by the American Diabetes Association criteria.

Abbreviations: CGC, cardia gastric cancer; CIs, confidence intervals; *H. pylori*, helicobacter pylori; BMI, body mass index.



Supplementary Table 5. Attributable cases of modifiable risk factors for NCGC from 2000 to 2050

| Risk factor                    | Attributable cases (95% CIs) |                          |                           |                          |                          |                          |                          |                          |                         |                        |                        |
|--------------------------------|------------------------------|--------------------------|---------------------------|--------------------------|--------------------------|--------------------------|--------------------------|--------------------------|-------------------------|------------------------|------------------------|
|                                | 2000                         | 2005                     | 2010                      | 2015                     | 2020                     | 2025                     | 2030                     | 2035                     | 2040                    | 2045                   | 2050                   |
| Male                           |                              |                          |                           |                          |                          |                          |                          |                          |                         |                        |                        |
| <i>H. pylori</i> <sup>a</sup>  | 105734<br>(86881,124588)     | 99867<br>(81387,118348)  | 108970<br>(88256,129683)  | 99011<br>(78548,119474)  | 89955<br>(69711,110199)  | 88808<br>(67892,109724)  | 85811<br>(65602,106021)  | 81228<br>(62098,100359)  | 75375<br>(57623,93127)  | 69267<br>(52954,85580) | 62319<br>(47642,76996) |
| Smoking <sup>b</sup>           | 44727<br>(33017,56431)       | 39779<br>(29027,50532)   | 41150<br>(29741,52556)    | 38070<br>(27458,48685)   | 35912<br>(25915,45921)   | 36538<br>(26394,46686)   | 35305<br>(25503,45111)   | 33420<br>(24141,42701)   | 31012<br>(22402,39624)  | 28498<br>(20586,36413) | 25430<br>(18370,32493) |
| Pickled vegetable <sup>c</sup> | 14591<br>(9660, 19516)       | 13694<br>(9063, 18328)   | 12520<br>(8196, 16834)    | 11181<br>(7311, 15051)   | 10531<br>(6886, 14177)   | 9161<br>(5944, 12375)    | 8374<br>(5433, 11311)    | 7607<br>(4936, 10275)    | 6824<br>(4428, 9218)    | 6138<br>(3982, 8291)   | 5322<br>(3453, 7188)   |
| Alcohol <sup>d</sup>           | 13297<br>(5201, 21395)       | 11199<br>(4290, 18100)   | 6683<br>(2392, 10972)     | 6582<br>(2368, 10800)    | 6929<br>(2517, 11347)    | 6066<br>(2170, 9955)     | 5215<br>(1865, 8558)     | 4530<br>(1620, 7434)     | 3919<br>(1402, 6432)    | 3447<br>(1233, 5657)   | 2903<br>(1038, 4763)   |
| Unhealthy BMI <sup>e</sup>     | 8995<br>(716, 17274)         | 9147<br>(1492, 16803)    | 10317<br>(1685, 18948)    | 10770<br>(1766, 19773)   | 11449<br>(2094, 20803)   | 11841<br>(1420, 22263)   | 12639<br>(1515, 23762)   | 12897<br>(1546, 24247)   | 12744<br>(1528, 23961)  | 12206<br>(1463, 22948) | 11530<br>(1382, 21677) |
| Diabetes <sup>f</sup>          | 586<br>(210, 967)            | 1312<br>(456, 2172)      | 2915<br>(1034, 4799)      | 3112<br>(1108, 5109)     | 2836<br>(1017, 4656)     | 3336<br>(1197, 5471)     | 4593<br>(1648, 7532)     | 5724<br>(2053, 9386)     | 6728<br>(2413, 11032)   | 7283<br>(2613, 11943)  | 8209<br>(2945, 13461)  |
| All above                      | 122465<br>(103889,134270)    | 115813<br>(97351,127772) | 125430<br>(104387,139651) | 115882<br>(94669,130116) | 107649<br>(86299,121773) | 107246<br>(84705,122146) | 104915<br>(82335,119860) | 100361<br>(78343,114889) | 94058<br>(73081,107821) | 87068<br>(67431,99866) | 79222<br>(61051,90915) |
| Female                         |                              |                          |                           |                          |                          |                          |                          |                          |                         |                        |                        |
| <i>H. pylori</i>               | 49179<br>(40410,57948)       | 49359<br>(40225,58493)   | 50131<br>(40602,59660)    | 52785<br>(41876,63695)   | 49590<br>(38430,60750)   | 49123<br>(37553,60692)   | 48099<br>(36771,59427)   | 46319<br>(35410,57228)   | 43117<br>(32962,53272)  | 39454<br>(30162,48746) | 35192<br>(26904,43481) |
| Smoking                        | 710<br>(215, 1206)           | 578<br>(172, 981)        | 475<br>(143, 808)         | 420<br>(125, 716)        | 362<br>(108, 618)        | 319<br>(95, 546)         | 266<br>(79, 456)         | 229<br>(68, 391)         | 194<br>(57, 332)        | 167<br>(50, 286)       | 138<br>(41, 237)       |
| Pickled vegetable              | 7111<br>(4721, 9501)         | 7074<br>(4692, 9456)     | 5923<br>(3886, 7962)      | 6110<br>(4001, 8224)     | 5951<br>(3897, 8009)     | 5128<br>(3332, 6925)     | 4725<br>(3070, 6382)     | 4351<br>(2827, 5876)     | 3903<br>(2536, 5271)    | 3489<br>(2267, 4712)   | 3016<br>(1960, 4074)   |

|                   |                           |                           |                           |                           |                           |                           |                           |                           |                           |                           |                          |
|-------------------|---------------------------|---------------------------|---------------------------|---------------------------|---------------------------|---------------------------|---------------------------|---------------------------|---------------------------|---------------------------|--------------------------|
| Alcohol           | 621<br>(209, 1037)        | 489<br>(166, 815)         | 225<br>(68, 380)          | 274<br>(89, 458)          | 266<br>(86, 446)          | 225<br>(73, 378)          | 181<br>(59, 305)          | 151<br>(49, 255)          | 126<br>(41, 212)          | 107<br>(35, 180)          | 87<br>(28, 147)          |
| Unhealthy         | 4772                      | 5003                      | 5625                      | 6420                      | 6869                      | 7219                      | 7732                      | 7966                      | 7847                      | 7451                      | 6994                     |
| BMI               | (593, 8950)               | (914, 9091)               | (1155, 10095)             | (1398, 11442)             | (1612, 12126)             | (1553, 12886)             | (1663, 13801)             | (1713, 14219)             | (1688, 14006)             | (1603, 13300)             | (1504, 12484)            |
| Diabetes          | 296<br>(104, 489)         | 722<br>(252, 1193)        | 1117<br>(394, 1841)       | 1511<br>(539, 2488)       | 1367<br>(482, 2250)       | 1595<br>(567, 2619)       | 2113<br>(752, 3469)       | 2570<br>(914, 4219)       | 2921<br>(1039, 4796)      | 3065<br>(1090, 5033)      | 3320<br>(1181, 5451)     |
| All above         | 52298<br>(42602,60078)    | 52681<br>(42615,60772)    | 53424<br>(42826,61990)    | 56730<br>(44484,66593)    | 53902<br>(41241,64040)    | 53545<br>(40212,64202)    | 52906<br>(39497,63539)    | 51367<br>(38160,61758)    | 48201<br>(35646,57991)    | 44370<br>(32709,53401)    | 39953<br>(29312,48090)   |
| Both sex          |                           |                           |                           |                           |                           |                           |                           |                           |                           |                           |                          |
| <i>H. pylori</i>  | 154913<br>(127290,182536) | 149226<br>(121611,176841) | 159101<br>(128858,189343) | 151797<br>(120425,183169) | 139545<br>(108141,170949) | 137931<br>(105446,170415) | 133910<br>(102372,165448) | 127548<br>(97508,157587)  | 118493<br>(90586,146399)  | 108721<br>(83116,134326)  | 97511<br>(74546,120476)  |
| Smoking           | 45436<br>(33232, 57637)   | 40357<br>(29199, 51513)   | 41625<br>(29883, 53364)   | 38490<br>(27583, 49401)   | 36274<br>(26022, 46539)   | 36857<br>(26489, 47231)   | 35572<br>(25582, 45567)   | 33648<br>(24209, 43093)   | 31205<br>(22459, 39956)   | 28666<br>(20636, 36699)   | 25569<br>(18411,32730)   |
| Pickled vegetable | 21702<br>(14381, 29017)   | 20769<br>(13755, 27784)   | 18444<br>(12081, 24796)   | 17291<br>(11312, 23275)   | 16482<br>(10783, 22186)   | 14289<br>(9276, 19300)    | 13099<br>(8503, 17693)    | 11958<br>(7763, 16151)    | 10727<br>(6964, 14489)    | 9627<br>(6249, 13003)     | 8338<br>(5413, 11262)    |
| Alcohol           | 13918<br>(5410, 22431)    | 11688<br>(4456, 18915)    | 6907<br>(2460, 11352)     | 6856<br>(2456, 11258)     | 7196<br>(2603, 11792)     | 6291<br>(2243, 10334)     | 5396<br>(1924, 8863)      | 4682<br>(1669, 7689)      | 4045<br>(1443, 6643)      | 3554<br>(1268, 5837)      | 2990<br>(1067, 4910)     |
| Unhealthy         | 13767                     | 14150                     | 15942                     | 17190                     | 18318                     | 19060                     | 20370                     | 20863                     | 20591                     | 19657                     | 18524                    |
| BMI               | (1309, 26224)             | (2406, 25894)             | (2840, 29044)             | (3164, 31215)             | (3706, 32930)             | (2973, 35148)             | (3178, 37563)             | (3260, 38466)             | (3216, 37967)             | (3066, 36248)             | (2887, 34161)            |
| Diabetes          | 882<br>(315, 1456)        | 2034<br>(708, 3365)       | 4033<br>(1428, 6640)      | 4623<br>(1647, 7597)      | 4203<br>(1499, 6906)      | 4931<br>(1764, 8090)      | 6706<br>(2399, 11001)     | 8294<br>(2967, 13605)     | 9649<br>(3452, 15828)     | 10349<br>(3703, 16976)    | 11529<br>(4126, 18912)   |
| All above         | 174763<br>(146490,194348) | 168494<br>(139966,188544) | 178854<br>(147213,201641) | 172612<br>(139153,196709) | 161551<br>(127540,185813) | 160791<br>(124917,186348) | 157821<br>(121831,183400) | 151728<br>(116503,176647) | 142258<br>(108727,165812) | 131438<br>(100140,153266) | 119175<br>(90363,139005) |

<sup>a</sup>The positive status of *H. pylori* infection as defined by enzyme-linked immunosorbent assay (ELISA), immunoblotting or urea breath test (UBT).

<sup>b</sup>Currently smoking, accumulated up to 100 cigarettes, and still smoking.

<sup>b</sup>Exclude those who did not use or consumed pickled vegetable minimally.

<sup>d</sup>Regular alcohol consumption, drinking alcohol at least three times a week.

<sup>e</sup>Unhealthy BMI included underweight (BMI<18.5) and overweight/obesity (BMI > 25.0).

<sup>f</sup>The diabetes as defined by the American Diabetes Association criteria.

Abbreviations: NCGC, non-cardia gastric cancer; *H. pylori*, helicobacter pylori; BMI, body mass index.

Supplementary Table 6. The current PAF and attributable cases of modifiable risk factors for CGC in urban and rural areas

| Risk factor        | Urban          |                         |                              | Rural          |                         |                              |
|--------------------|----------------|-------------------------|------------------------------|----------------|-------------------------|------------------------------|
|                    | Prevalence (%) | PAF (95% CIs)           | Attributable cases (95% CIs) | Prevalence (%) | PAF (95% CIs)           | Attributable cases (95% CIs) |
| <i>H. pylori</i>   | 46.2           | 48.74<br>(23.20, 74.28) | 32202<br>(15327, 49078)      | 51.5           | 51.49<br>(25.95, 77.02) | 42960<br>(21653, 64267)      |
| Smoking            | 23.0           | 12.85<br>(8.27, 17.43)  | 8491<br>(5466, 11517)        | 26.7           | 14.30<br>(9.25, 19.35)  | 11934<br>(7721, 16146)       |
| Pickled vegetable  | 17.8           | 7.87<br>(5.14, 10.60)   | 5200<br>(3395, 7006)         | 19.1           | 8.40<br>(5.50, 11.30)   | 7007<br>(4588, 9426)         |
| Alcohol            | 27.5           | 7.86<br>(2.98, 12.73)   | 5190<br>(1972, 8408)         | 27.6           | 7.88<br>(3.00, 12.77)   | 6576<br>(2500, 10653)        |
| Unhealthy BMI      |                |                         |                              |                |                         |                              |
| Underweight        | 4.5            | 9.07<br>(1.87, 16.27)   | 5992<br>(1235, 10750)        | 5.4            | 9.26<br>(1.99, 16.52)   | 7723<br>(1660, 13786)        |
| Overweight/obesity | 34.2           |                         |                              | 33.3           |                         |                              |
| Diabetes           | 13.1           | 2.43<br>(0.87, 3.99)    | 1604<br>(575, 2634)          | 11.6           | 2.16<br>(0.77, 3.54)    | 1799<br>(642, 2957)          |
| All above          | -              | 66.36<br>(36.93, 86.68) | 43843<br>(24399, 57268)      | -              | 68.85<br>(40.09, 88.45) | 57448<br>(33451, 73802)      |

Abbreviations: PAF, population attributable fraction; CGC, cardia gastric cancer; CIs, confidence intervals; *H.*

*pylori*, helicobacter pylori; BMI, body mass index.

Supplementary Table 7. The current PAF and attributable cases of modifiable risk factors for NCGC in urban and rural areas

| Risk factor        | Urban          |                         |                              | Rural          |                         |                              |
|--------------------|----------------|-------------------------|------------------------------|----------------|-------------------------|------------------------------|
|                    | Prevalence (%) | PAF (95% CIs)           | Attributable cases (95% CIs) | Prevalence (%) | PAF (95% CIs)           | Attributable cases (95% CIs) |
| <i>H. pylori</i>   | 46.2           | 69.52<br>(54.14, 84.89) | 91411<br>(71198, 111623)     | 51.5           | 71.79<br>(57.1, 86.48)  | 62381<br>(49617, 75144)      |
| Smoking            | 23.0           | 11.77<br>(7.37, 16.17)  | 15481<br>(9697, 21265)       | 26.7           | 13.46<br>(8.54, 18.38)  | 11696<br>(7423, 15970)       |
| Pickled vegetable  | 17.8           | 7.87<br>(5.14, 10.60)   | 10351<br>(6757, 13945)       | 19.1           | 8.40<br>(5.50, 11.30)   | 7297<br>(4778, 9816)         |
| Alcohol            | 27.5           | 7.86<br>(2.98, 12.73)   | 10330<br>(3925, 16734)       | 27.6           | 7.88<br>(3.00, 12.77)   | 6848<br>(2604, 11093)        |
| Unhealthy BMI      |                |                         |                              |                |                         |                              |
| Underweight        | 4.5            | 9.07<br>(1.87, 16.27)   | 11927<br>(2458, 21396)       | 5.4            | 9.26<br>(1.99, 16.52)   | 8043<br>(1729, 14356)        |
| Overweight/obesity | 34.2           |                         |                              | 33.3           |                         |                              |
| Diabetes           | 13.1           | 2.43<br>(0.87, 3.99)    | 3193<br>(1145, 5242)         | 11.6           | 2.16<br>(0.77, 3.54)    | 1874<br>(668, 3079)          |
| All above          | -              | 79.74<br>(61.98, 92.05) | 104856<br>(81502, 121044)    | -              | 81.71<br>(65.02, 93.12) | 70998<br>(56496, 80913)      |

Abbreviations: PAF, population attributable fraction; NCGC, non-cardia gastric cancer; CIs, confidence intervals;

*H. pylori*, helicobacter pylori; BMI, body mass index.

Supplementary Table 8. PAF of modifiable risk factors (excluding diabetes and underweight) for GC from 2000 to

2050

| Risk factor                    | PAF (95% CIs)          |                        |                        |                        |                        |                        |                        |                        |                        |                        |                        |
|--------------------------------|------------------------|------------------------|------------------------|------------------------|------------------------|------------------------|------------------------|------------------------|------------------------|------------------------|------------------------|
|                                | 2000                   | 2005                   | 2010                   | 2015                   | 2020                   | 2025                   | 2030                   | 2035                   | 2040                   | 2045                   | 2050                   |
| Male                           |                        |                        |                        |                        |                        |                        |                        |                        |                        |                        |                        |
| <i>H. pylori</i> <sup>a</sup>  | 67.09<br>(48.58,85.6)  | 66.06<br>(47.31,84.8)  | 65.24<br>(46.3,84.18)  | 62.59<br>(43.09,82.08) | 59.56<br>(39.53,79.6)  | 57.99<br>(37.78,78.2)  | 56.24<br>(36.7,75.79)  | 55.00<br>(35.95,74.06) | 54.02<br>(35.37,72.66) | 53.38<br>(34.99,71.77) | 52.42<br>(34.32,70.51) |
| Smoking <sup>b</sup>           | 31.90<br>(23.55,40.25) | 29.67<br>(21.65,37.69) | 27.87<br>(20.14,35.59) | 27.49<br>(19.83,35.16) | 27.54<br>(19.87,35.21) | 27.78<br>(20.07,35.5)  | 27.10<br>(19.57,34.62) | 26.59<br>(19.21,33.98) | 26.18<br>(18.91,33.45) | 25.92<br>(18.72,33.12) | 25.57<br>(18.47,32.67) |
| Pickled vegetable <sup>c</sup> | 10.41<br>(6.89,13.92)  | 10.21<br>(6.76,13.67)  | 8.48<br>(5.55,11.4)    | 8.07<br>(5.28,10.87)   | 8.07<br>(5.28,10.87)   | 6.97<br>(4.52,9.41)    | 6.43<br>(4.17,8.68)    | 6.05<br>(3.93,8.18)    | 5.76<br>(3.74,7.78)    | 5.58<br>(3.62,7.54)    | 5.35<br>(3.47,7.23)    |
| Alcohol <sup>d</sup>           | 9.48<br>(3.71,15.26)   | 8.35<br>(3.2,13.5)     | 4.53<br>(1.62,7.43)    | 4.75<br>(1.71,7.8)     | 5.31<br>(1.93,8.7)     | 4.61<br>(1.65,7.57)    | 4.00<br>(1.43,6.57)    | 3.6<br>(1.29,5.92)     | 3.31<br>(1.18,5.43)    | 3.14<br>(1.12,5.14)    | 2.92<br>(1.04,4.79)    |
| High BMI <sup>e</sup>          | 1.53<br>(0,3.57)       | 2.76<br>(0,5.95)       | 3.88<br>(0,8.37)       | 4.83<br>(0,10.22)      | 6.68<br>(0,04,13.32)   | 7.54<br>(0,15.23)      | 10.18<br>(0,20.54)     | 12.84<br>(0,25.92)     | 15.68<br>(0,31.65)     | 18.00<br>(0,36.34)     | 21.93<br>(0,44.27)     |
| All above                      | 82.10<br>(64.76,94.49) | 80.90<br>(62.74,93.82) | 78.94<br>(60.15,92.71) | 77.39<br>(57.52,91.82) | 76.20<br>(55.01,90.96) | 75.11<br>(53.3,90.22)  | 74.26<br>(51.91,88.96) | 73.93<br>(50.92,88.06) | 73.92<br>(50.15,87.34) | 74.11<br>(49.65,86.9)  | 74.59<br>(48.85,86.28) |
| Female                         |                        |                        |                        |                        |                        |                        |                        |                        |                        |                        |                        |
| <i>H. pylori</i>               | 68.89<br>(51.48,86.31) | 67.97<br>(50.36,85.59) | 67.10<br>(49.22,84.97) | 64.45<br>(45.95,82.96) | 61.44<br>(42.31,80.57) | 59.71<br>(40.27,79.15) | 57.80<br>(38.91,76.69) | 56.38<br>(37.87,74.89) | 55.17<br>(36.96,73.38) | 54.32<br>(36.28,72.37) | 53.29<br>(35.51,71.08) |
| Smoking                        | 1.09<br>(0.33,1.85)    | 0.87<br>(0.26,1.48)    | 0.70<br>(0.21,1.19)    | 0.57<br>(0.17,0.97)    | 0.500<br>(0.15,0.86)   | 0.44<br>(0.13,0.75)    | 0.36<br>(0.11,0.62)    | 0.32<br>(0.09,0.55)    | 0.29<br>(0.08,0.49)    | 0.27<br>(0.08,0.46)    | 0.24<br>(0.07,0.42)    |
| Pickled vegetable              | 10.91<br>(7.24,14.57)  | 10.68<br>(7.08,14.27)  | 8.72<br>(5.72,11.72)   | 8.28<br>(5.42,11.14)   | 8.28<br>(5.42,11.14)   | 7.05<br>(4.58,9.52)    | 6.47<br>(4.2,8.74)     | 6.07<br>(3.94,8.2)     | 5.76<br>(3.74,7.78)    | 5.57<br>(3.62,7.52)    | 5.33<br>(3.46,7.19)    |

|                   |                        |                        |                        |                        |                        |                        |                        |                        |                        |                        |                        |
|-------------------|------------------------|------------------------|------------------------|------------------------|------------------------|------------------------|------------------------|------------------------|------------------------|------------------------|------------------------|
| Alcohol           | 0.95<br>(0.32,1.59)    | 0.74<br>(0.25,1.23)    | 0.33<br>(0.1,0.56)     | 0.37<br>(0.12,0.62)    | 0.37<br>(0.12,0.62)    | 0.31<br>(0.1,0.52)     | 0.25<br>(0.08,0.42)    | 0.21<br>(0.07,0.36)    | 0.19<br>(0.06,0.31)    | 0.17<br>(0.06,0.29)    | 0.15<br>(0.05,0.26)    |
| High BMI          | 2.35<br>(0,5.29)       | 3.50<br>(0,7.39)       | 4.81<br>(0,9.83)       | 5.51<br>(0,11.03)      | 6.91<br>(0.44,13.38)   | 7.88<br>(0.58,15.18)   | 9.89<br>(0.72,19.05)   | 11.77<br>(0.86,22.68)  | 13.67<br>(1.00,26.33)  | 15.13<br>(1.11,29.15)  | 17.47<br>(1.28,33.66)  |
| All above         | 73.49<br>(55.29,90.25) | 72.84<br>(54.11,89.63) | 71.70<br>(52.28,88.91) | 69.49<br>(49.03,87.41) | 67.37<br>(45.61,85.87) | 65.76<br>(43.14,84.67) | 64.65<br>(41.58,82.93) | 64.04<br>(40.42,81.68) | 63.70<br>(39.41,80.68) | 63.55<br>(38.67,80.02) | 63.65<br>(37.82,79.21) |
| Both sex          |                        |                        |                        |                        |                        |                        |                        |                        |                        |                        |                        |
| <i>H. pylori</i>  | 67.61<br>(49.41,85.8)  | 66.63<br>(48.22,85.04) | 65.77<br>(47.13,84.41) | 63.17<br>(43.99,82.36) | 60.17<br>(40.43,79.91) | 58.55<br>(38.59,78.51) | 56.76<br>(37.43,76.09) | 55.47<br>(36.6,74.34)  | 54.41<br>(35.92,72.91) | 53.71<br>(35.44,71.98) | 52.72<br>(34.73,70.71) |
| Smoking           | 23.11<br>(16.92,29.29) | 21.13<br>(15.3,26.95)  | 20.18<br>(14.5,25.85)  | 19.03<br>(13.65,24.42) | 18.85<br>(13.53,24.17) | 18.90<br>(13.59,24.21) | 18.25<br>(13.13,23.37) | 17.72<br>(12.75,22.68) | 17.31<br>(12.46,22.16) | 17.06<br>(12.28,21.84) | 16.85<br>(12.13,21.56) |
| Pickled vegetable | 10.55<br>(6.99,14.11)  | 10.35<br>(6.85,13.85)  | 8.55<br>(5.6,11.49)    | 8.14<br>(5.32,10.95)   | 8.14<br>(5.32,10.96)   | 6.99<br>(4.54,9.45)    | 6.44<br>(4.18,8.7)     | 6.06<br>(3.93,8.18)    | 5.76<br>(3.74,7.78)    | 5.58<br>(3.62,7.53)    | 5.34<br>(3.47,7.22)    |
| Alcohol           | 7.05<br>(2.74,11.36)   | 6.09<br>(2.32,9.86)    | 3.34<br>(1.19,5.49)    | 3.38<br>(1.21,5.54)    | 3.72<br>(1.35,6.1)     | 3.21<br>(1.15,5.28)    | 2.76<br>(0.98,4.53)    | 2.46<br>(0.88,4.04)    | 2.24<br>(0.8,3.68)     | 2.11<br>(0.75,3.47)    | 1.97<br>(0.7,3.23)     |
| High BMI          | 1.76<br>(0,4.06)       | 2.98<br>(0,6.37)       | 4.14<br>(0,8.78)       | 5.04<br>(0,10.48)      | 6.76<br>(0.17,13.34)   | 7.65<br>(0.19,15.21)   | 10.08<br>(0.24,20.05)  | 12.48<br>(0.29,24.83)  | 14.99<br>(0.34,29.83)  | 17.01<br>(0.38,33.86)  | 20.39<br>(0.44,40.61)  |
| All above         | 79.64<br>(62.05,93.28) | 78.51<br>(60.18,92.58) | 76.89<br>(57.92,91.64) | 74.91<br>(54.85,90.43) | 73.36<br>(51.99,89.32) | 72.07<br>(50.88,84.2)  | 71.08<br>(48.49,86.96) | 70.59<br>(47.38,85.9)  | 70.42<br>(46.47,85.06) | 70.46<br>(45.85,84.52) | 70.82<br>(45.05,83.85) |

<sup>a</sup>The positive status of *H. pylori* infection as defined by enzyme-linked immunosorbent assay (ELISA), immunoblotting or urea breath test (UBT).

<sup>b</sup>Currently smoking, accumulated up to 100 cigarettes, and still smoking.

<sup>b</sup>Exclude those who did not use or consumed pickled vegetable minimally.

<sup>d</sup>Regular alcohol consumption, drinking alcohol at least three times a week.

<sup>e</sup>High BMI included overweight and obesity (BMI > 25.0).

Abbreviations: PAF, population attributable fraction; GC, gastric cancer; CIs, confidence intervals; *H. pylori*,

*helicobacter pylori*; BMI, body mass index.



Supplementary Table 9. Attributable cases of modifiable risk factors (excluding diabetes and underweight) for GC

from 2000 to 2050

| Risk factor                    | Attributable cases (95% CIs) |                           |                           |                           |                           |                           |                           |                           |                           |                          |                          |
|--------------------------------|------------------------------|---------------------------|---------------------------|---------------------------|---------------------------|---------------------------|---------------------------|---------------------------|---------------------------|--------------------------|--------------------------|
|                                | 2000                         | 2005                      | 2010                      | 2015                      | 2020                      | 2025                      | 2030                      | 2035                      | 2040                      | 2045                     | 2050                     |
| Male                           |                              |                           |                           |                           |                           |                           |                           |                           |                           |                          |                          |
| <i>H. pylori</i> <sup>a</sup>  | 165459<br>(119816,211102)    | 155469<br>(111353,199584) | 169670<br>(120414,218926) | 154181<br>(106157,202204) | 141472<br>(93896,189048)  | 139269<br>(90725,187813)  | 133884<br>(87353,180414)  | 126020<br>(82365,169674)  | 116239<br>(76113,156365)  | 106455<br>(69780,143129) | 96112<br>(62933,129292)  |
| Smoking <sup>b</sup>           | 78674<br>(58077,99262)       | 69826<br>(50952,88702)    | 72470<br>(52377,92557)    | 67733<br>(48852,86618)    | 65401<br>(47194,83628)    | 66724<br>(48199,85255)    | 64500<br>(46592,82413)    | 60929<br>(44013,77850)    | 56343<br>(40700,71991)    | 51688<br>(37338,66043)   | 46883<br>(33867,59904)   |
| Pickled vegetable <sup>c</sup> | 25665<br>(16992,34328)       | 24038<br>(15909,32172)    | 22050<br>(14434,29647)    | 19892<br>(13007,26779)    | 19178<br>(12541,25818)    | 16730<br>(10855,22599)    | 15298<br>(9926,20664)     | 13869<br>(8998,18734)     | 12398<br>(8044,16747)     | 11132<br>(7223,15037)    | 9811<br>(6366,13252)     |
| Alcohol <sup>d</sup>           | 23389<br>(9149,37633)        | 19658<br>(7531,31772)     | 11769<br>(4213,19323)     | 11711<br>(4213,19216)     | 12619<br>(4584,20664)     | 11078<br>(3963,18180)     | 9527<br>(3408,15634)      | 8259<br>(2954,13554)      | 7120<br>(2547,11685)      | 6252<br>(2236,10260)     | 5351<br>(1914,8782)      |
| High BMI <sup>e</sup>          | 3763<br>(0,8814)             | 6504<br>(0,13998)         | 10096<br>(0,21768)        | 11896<br>(0,25183)        | 15868<br>(94,31641)       | 18116<br>(0,36570)        | 24223<br>(0,48898)        | 29418<br>(0,59384)        | 33740<br>(0,68110)        | 35904<br>(0,72476)       | 40209<br>(0,81167)       |
| All above                      | 202478<br>(159698,233032)    | 190389<br>(147663,220797) | 205301<br>(156434,241113) | 190661<br>(141708,226196) | 180992<br>(130663,216033) | 180380<br>(127999,216673) | 176774<br>(123568,211752) | 169384<br>(116673,201753) | 159076<br>(107917,187950) | 147779<br>(99005,173285) | 136778<br>(89571,158212) |
| Female                         |                              |                           |                           |                           |                           |                           |                           |                           |                           |                          |                          |
| <i>H. pylori</i>               | 67876<br>(50720,85032)       | 67487<br>(49995,84980)    | 68894<br>(50542,87246)    | 72770<br>(51877,93663)    | 69111<br>(47594,90627)    | 69038<br>(46565,91511)    | 68018<br>(45784,90252)    | 65909<br>(44274,87543)    | 61847<br>(41437,82256)    | 57169<br>(38178,76160)   | 51344<br>(34212,68475)   |
| Smoking                        | 1072<br>(325,1823)           | 866<br>(258,1469)         | 718<br>(216,1222)         | 642<br>(192,1095)         | 566<br>(169,967)          | 507<br>(150,867)          | 429<br>(127,735)          | 373<br>(111,638)          | 320<br>(95,549)           | 281<br>(83,481)          | 235<br>(70,402)          |
| Pickled vegetable              | 10744<br>(7133,14355)        | 10600<br>(7029,14168)     | 8953<br>(5873,12034)      | 9345<br>(6119,12577)      | 9310<br>(6096,12530)      | 8151<br>(5295,11007)      | 7614<br>(4947,10283)      | 7098<br>(4611,9585)       | 6458<br>(4196,8722)       | 5864<br>(3810,7919)      | 5132<br>(3334,6930)      |

|                      |                           |                           |                           |                           |                           |                           |                           |                           |                           |                           |                           |
|----------------------|---------------------------|---------------------------|---------------------------|---------------------------|---------------------------|---------------------------|---------------------------|---------------------------|---------------------------|---------------------------|---------------------------|
| Alcohol              | 938<br>(315,1567)         | 733<br>(248,1221)         | 339<br>(103,575)          | 418<br>(135,700)          | 417<br>(135,697)          | 357<br>(116,601)          | 292<br>(94,491)           | 247<br>(80,416)           | 208<br>(67,350)           | 180<br>(58,303)           | 149<br>(48,250)           |
| High<br>BMI          | 2316<br>(0,5210)          | 3478<br>(0,7334)          | 4938<br>(0,10098)         | 6219<br>(0,12456)         | 7776<br>(498,15055)       | 9111<br>(667,17555)       | 11634<br>(852,22415)      | 13763<br>(1007,26519)     | 15320<br>(1121,29518)     | 15923<br>(1166,30680)     | 16830<br>(1232,32428)     |
| All above            | 72402<br>(54470,88917)    | 72315<br>(53718,88989)    | 73624<br>(53679,91286)    | 78450<br>(55352,98682)    | 75774<br>(51302,96579)    | 76030<br>(49883,97898)    | 76080<br>(48934,97589)    | 74868<br>(47255,95491)    | 71405<br>(44178,90442)    | 66884<br>(40694,84220)    | 61323<br>(36436,76314)    |
| Both sex             |                           |                           |                           |                           |                           |                           |                           |                           |                           |                           |                           |
| <i>H. pylori</i>     | 233335<br>(170536,296134) | 222956<br>(161348,284564) | 238564<br>(170956,306172) | 226951<br>(158034,295868) | 210583<br>(141490,279676) | 208307<br>(137290,279324) | 201902<br>(133137,270666) | 191929<br>(126640,257218) | 178086<br>(117551,238621) | 163623<br>(107958,219289) | 147456<br>(97145,197767)  |
| Smoking              | 79746<br>(58402,101084)   | 70692<br>(51210,90171)    | 73187<br>(52592,93779)    | 68375<br>(49044,87713)    | 65967<br>(47362,84595)    | 67231<br>(48349,86122)    | 64929<br>(46720,83148)    | 61302<br>(44123,78489)    | 56663<br>(40795,72539)    | 51969<br>(37421,66525)    | 47118<br>(33936,60306)    |
| Pickled<br>vegetable | 36409<br>(24125,48683)    | 34638<br>(22939,46340)    | 31002<br>(20307,41681)    | 29237<br>(19127,39356)    | 28488<br>(18637,38347)    | 24881<br>(16150,33606)    | 22912<br>(14873,30947)    | 20967<br>(13610,28319)    | 18856<br>(12240,25468)    | 16996<br>(11032,22956)    | 14943<br>(9700,20182)     |
| Alcohol              | 24327<br>(9465,39200)     | 20391<br>(7779,32993)     | 12108<br>(4316,19898)     | 12129<br>(4348,19916)     | 13036<br>(4719,21361)     | 11435<br>(4078,18781)     | 9819<br>(3502,16125)      | 8507<br>(3034,13970)      | 7329<br>(2614,12035)      | 6432<br>(2295,10563)      | 5500<br>(1962,9032)       |
| High<br>BMI          | 6079<br>(0,14024)         | 9981<br>(0,21332)         | 15034<br>(0,31866)        | 18115<br>(0,37639)        | 23644<br>(592,46695)      | 27227<br>(667,54125)      | 35857<br>(852,71314)      | 43181<br>(1007,85903)     | 49060<br>(1121,97627)     | 51827<br>(1166,103157)    | 57039<br>(1232,113596)    |
| All above            | 274880<br>(214167,321949) | 262704<br>(201381,309787) | 278925<br>(210113,332399) | 269112<br>(197060,324878) | 256765<br>(181965,312612) | 256410<br>(177882,314571) | 252854<br>(172501,309341) | 244252<br>(163928,297244) | 230482<br>(152094,278392) | 214663<br>(139699,257505) | 198101<br>(126007,234526) |

<sup>a</sup>The positive status of *H. pylori* infection as defined by enzyme-linked immunosorbent assay (ELISA), immunoblotting or urea breath test (UBT).

<sup>b</sup>Currently smoking, accumulated up to 100 cigarettes, and still smoking.

<sup>b</sup>Exclude those who did not use or consumed pickled vegetable minimally.

<sup>d</sup>Regular alcohol consumption, drinking alcohol at least three times a week.

<sup>e</sup>High BMI included overweight and obesity (BMI > 25.0).

Abbreviations: GC, gastric cancer; CIs, confidence intervals; *H. pylori*, helicobacter pylori; BMI, body mass index.
