# Supplementary material for: Trends of gastric cancer burdens attributable to risk factors in China from 2000 to 2050
Source: PubMed Central journal article supplement — Lancet Reg Health West Pac. 2024 Jan 6;44:101003. doi: 10.1016/j.lanwpc.2023.101003 (PMC10806286; doi:10.1016/j.lanwpc.2023.101003), 2024-01-06
Supplement: mmc9.pdf [file mmc9.pdf]

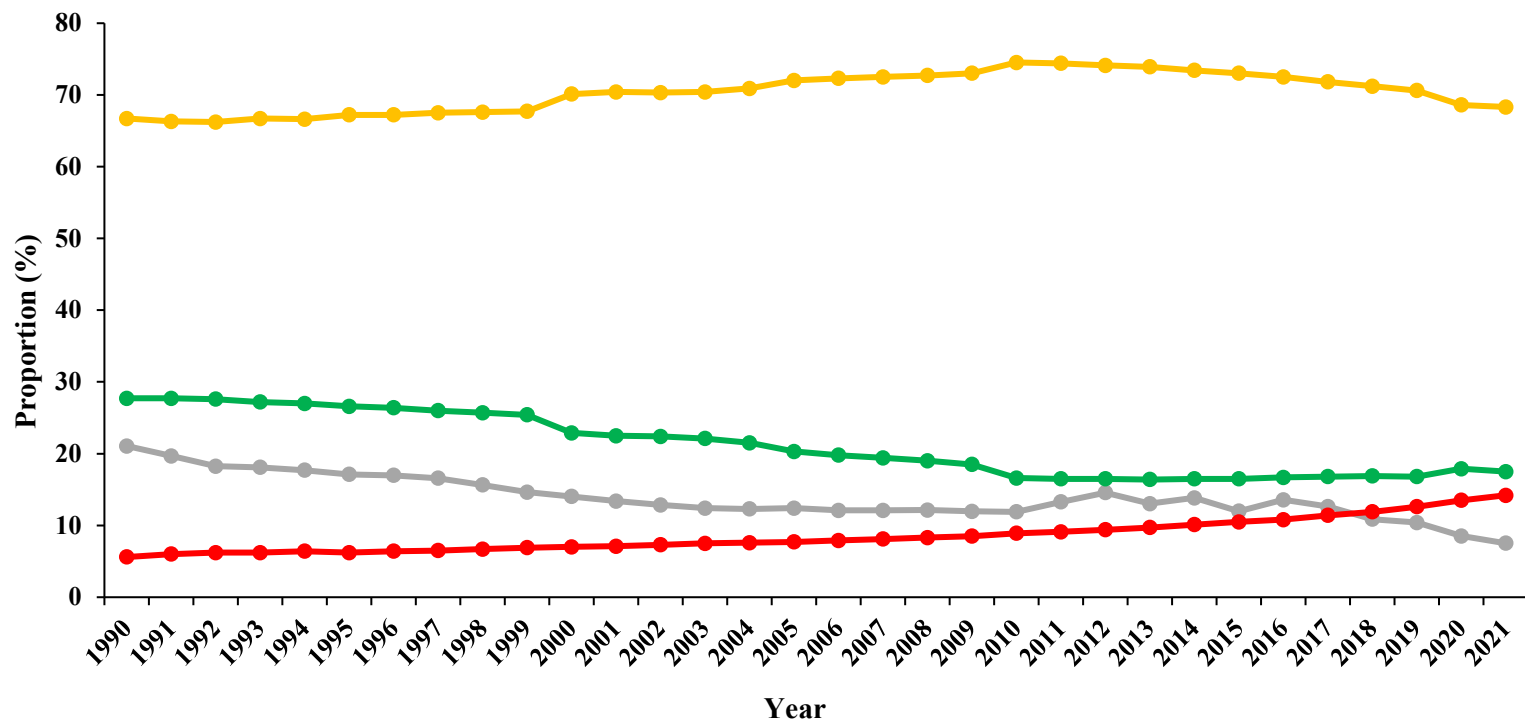

Birth rate
  Proportion of population aged 0-14 years

Proportion of population aged 15-64 years
  Proportion of population aged 65+ years
