# Supplementary figures and images for: Trends of gastric cancer burdens attributable to risk factors in China from 2000 to 2050
Source: PubMed Central journal article supplement — Lancet Reg Health West Pac. 2024 Jan 6;44:101003. doi: 10.1016/j.lanwpc.2023.101003 (PMC10806286; doi:10.1016/j.lanwpc.2023.101003), 2024-01-06

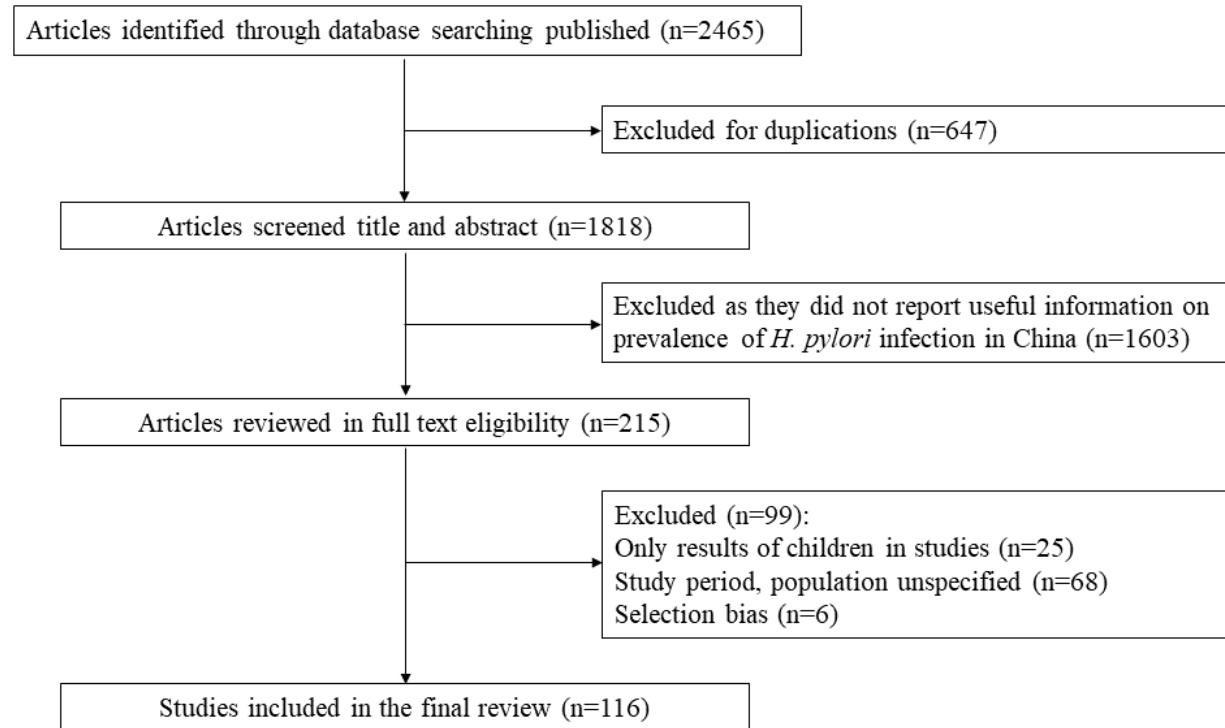

Supplement: mmc2.pdf [file mmc2.pdf]

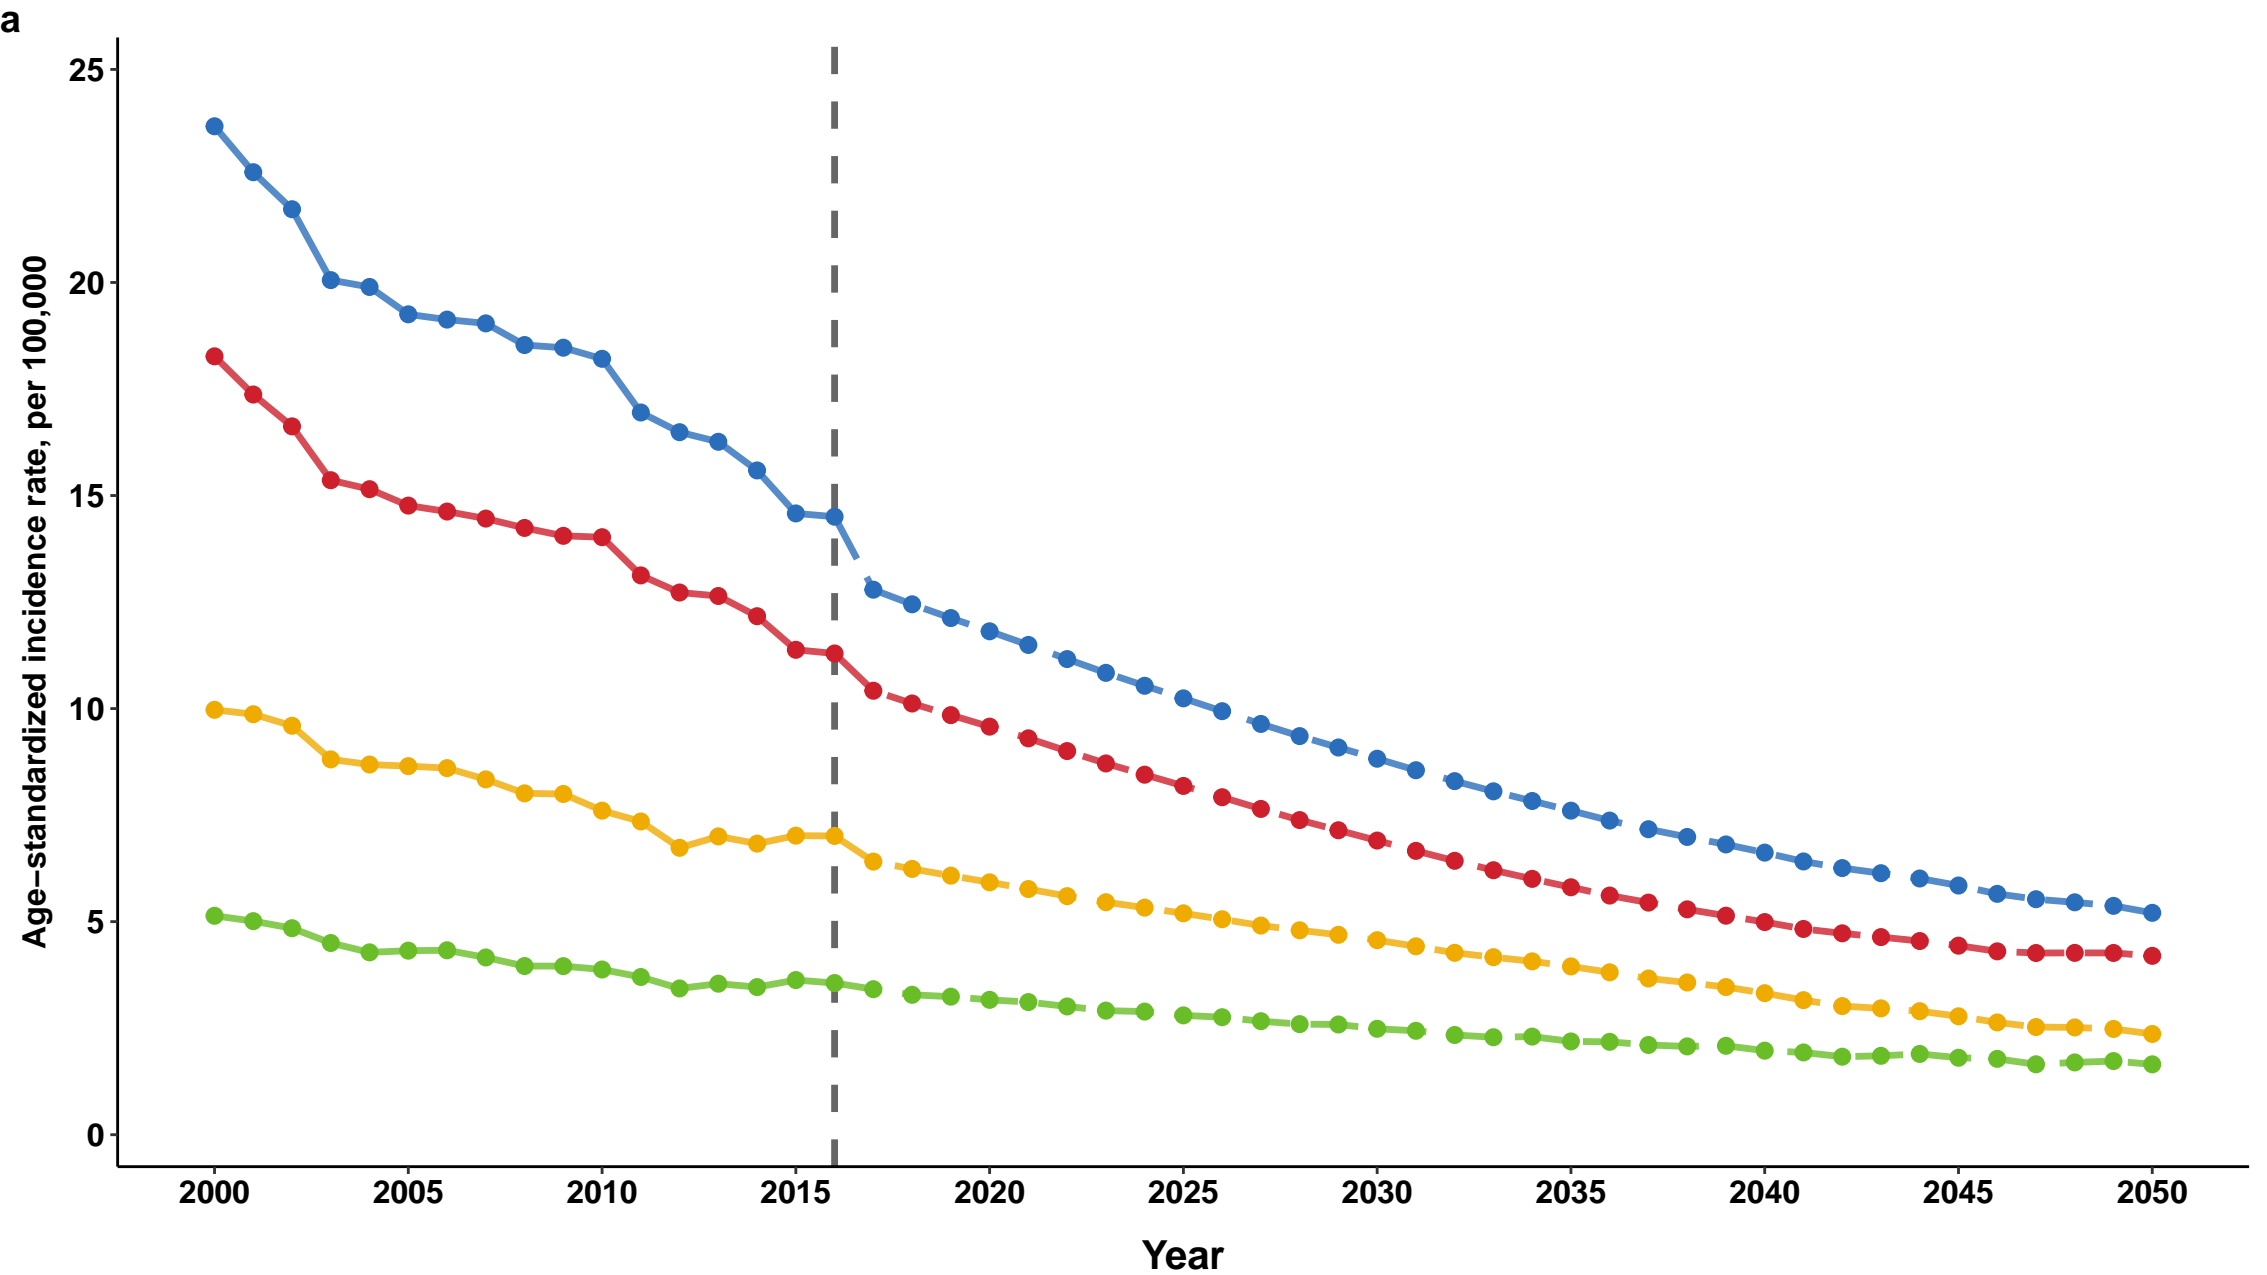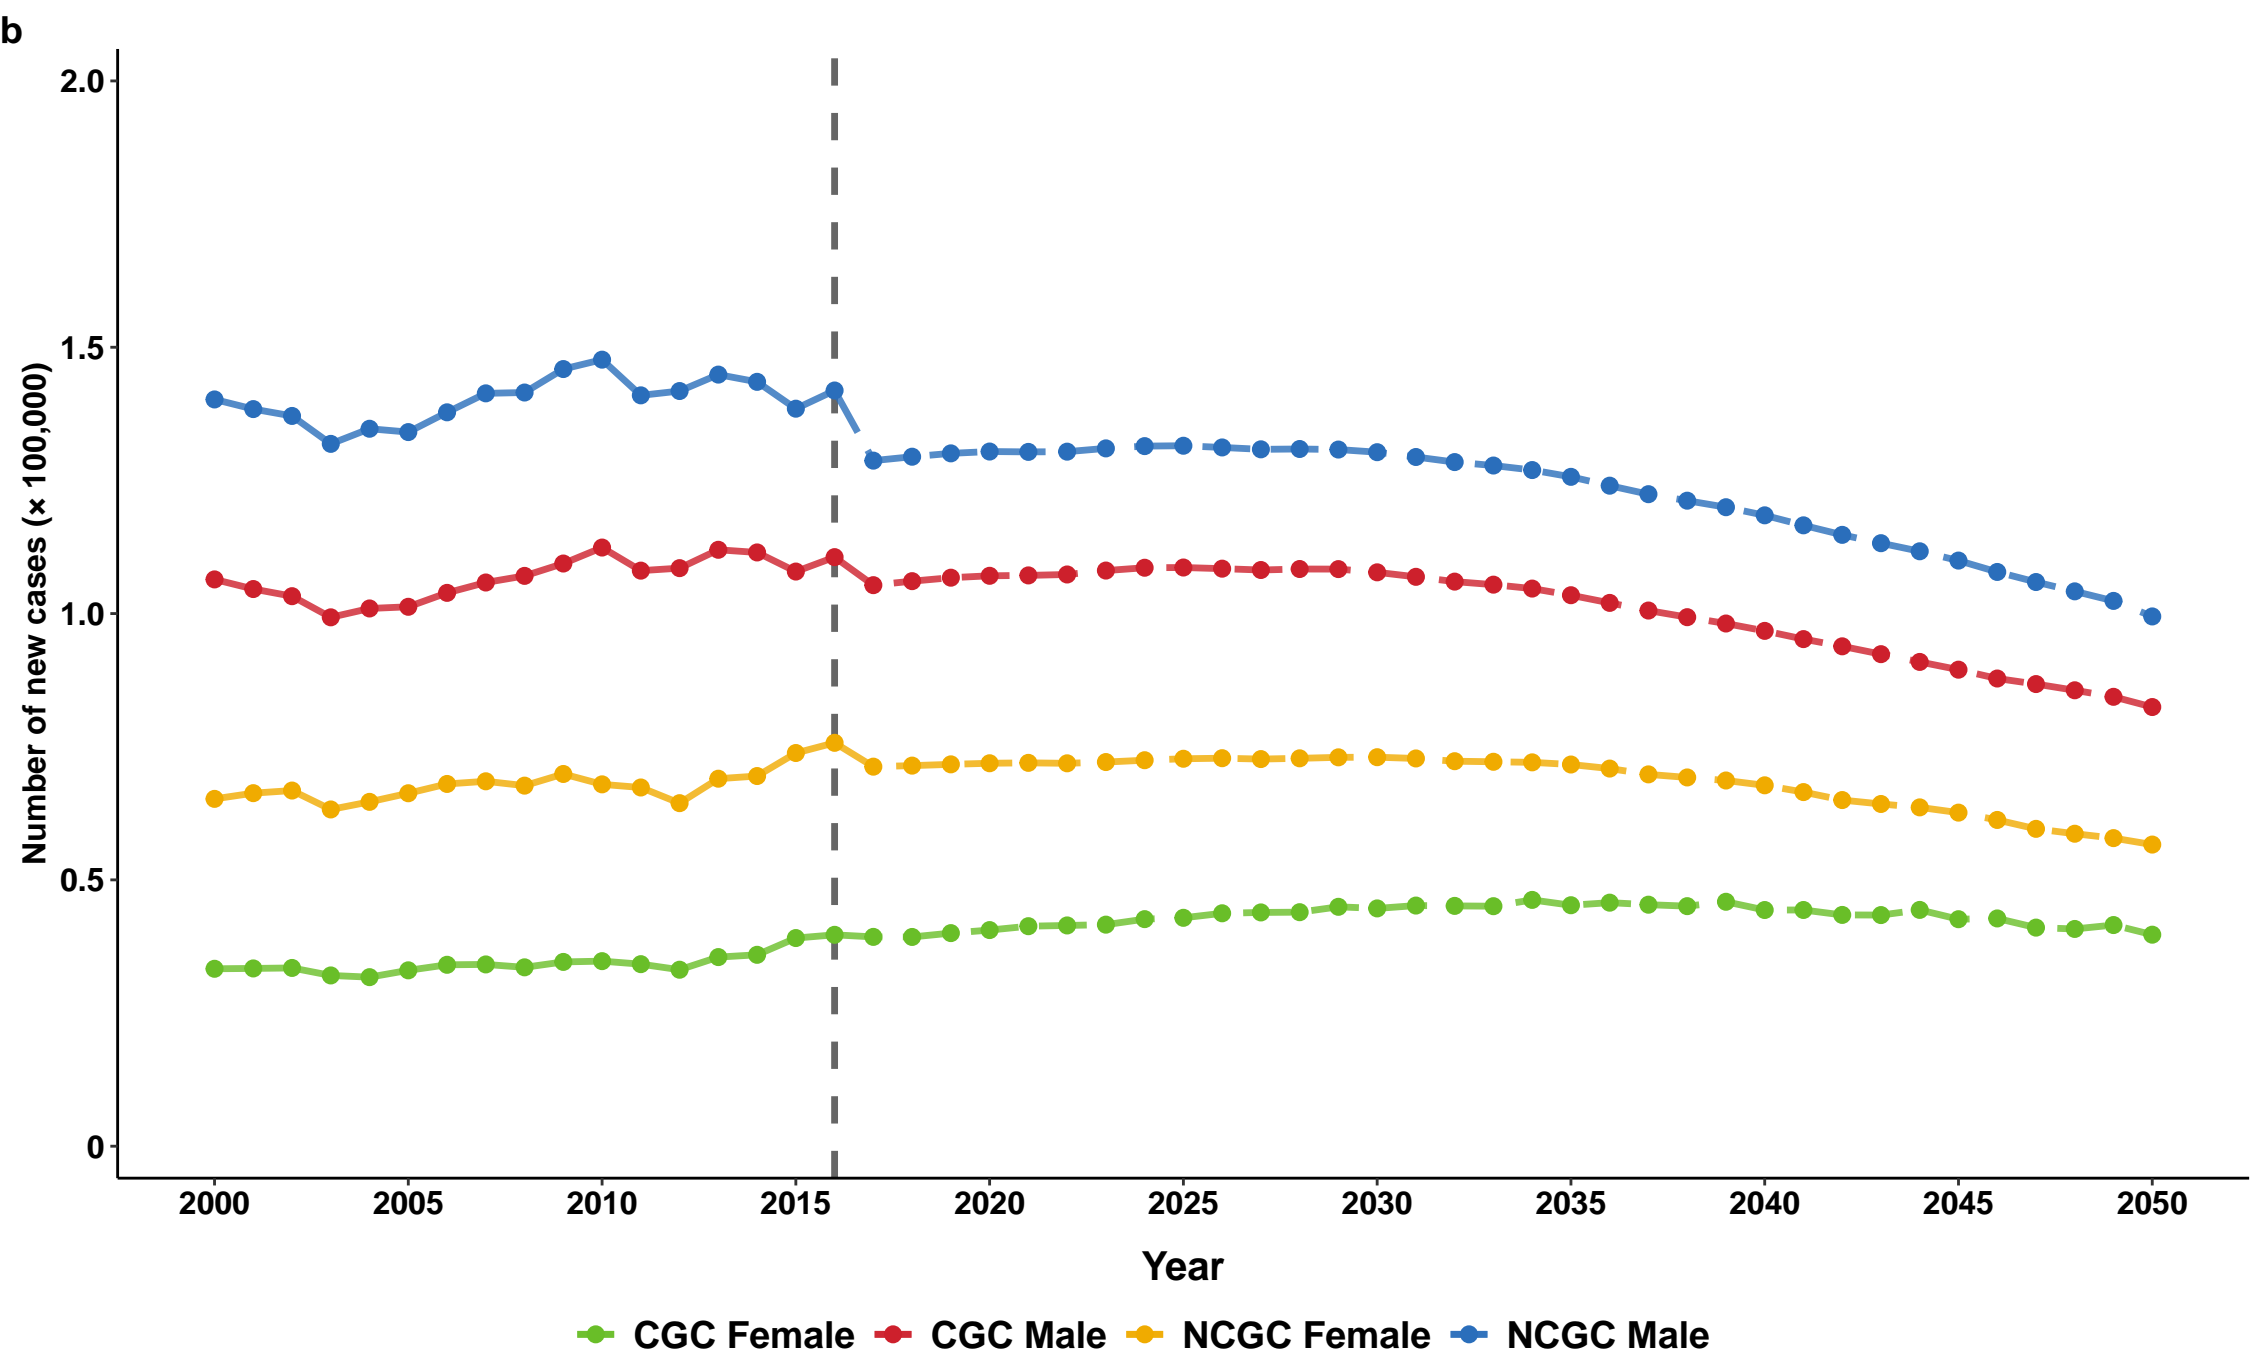

Supplement: mmc3.pdf [file mmc3.pdf]

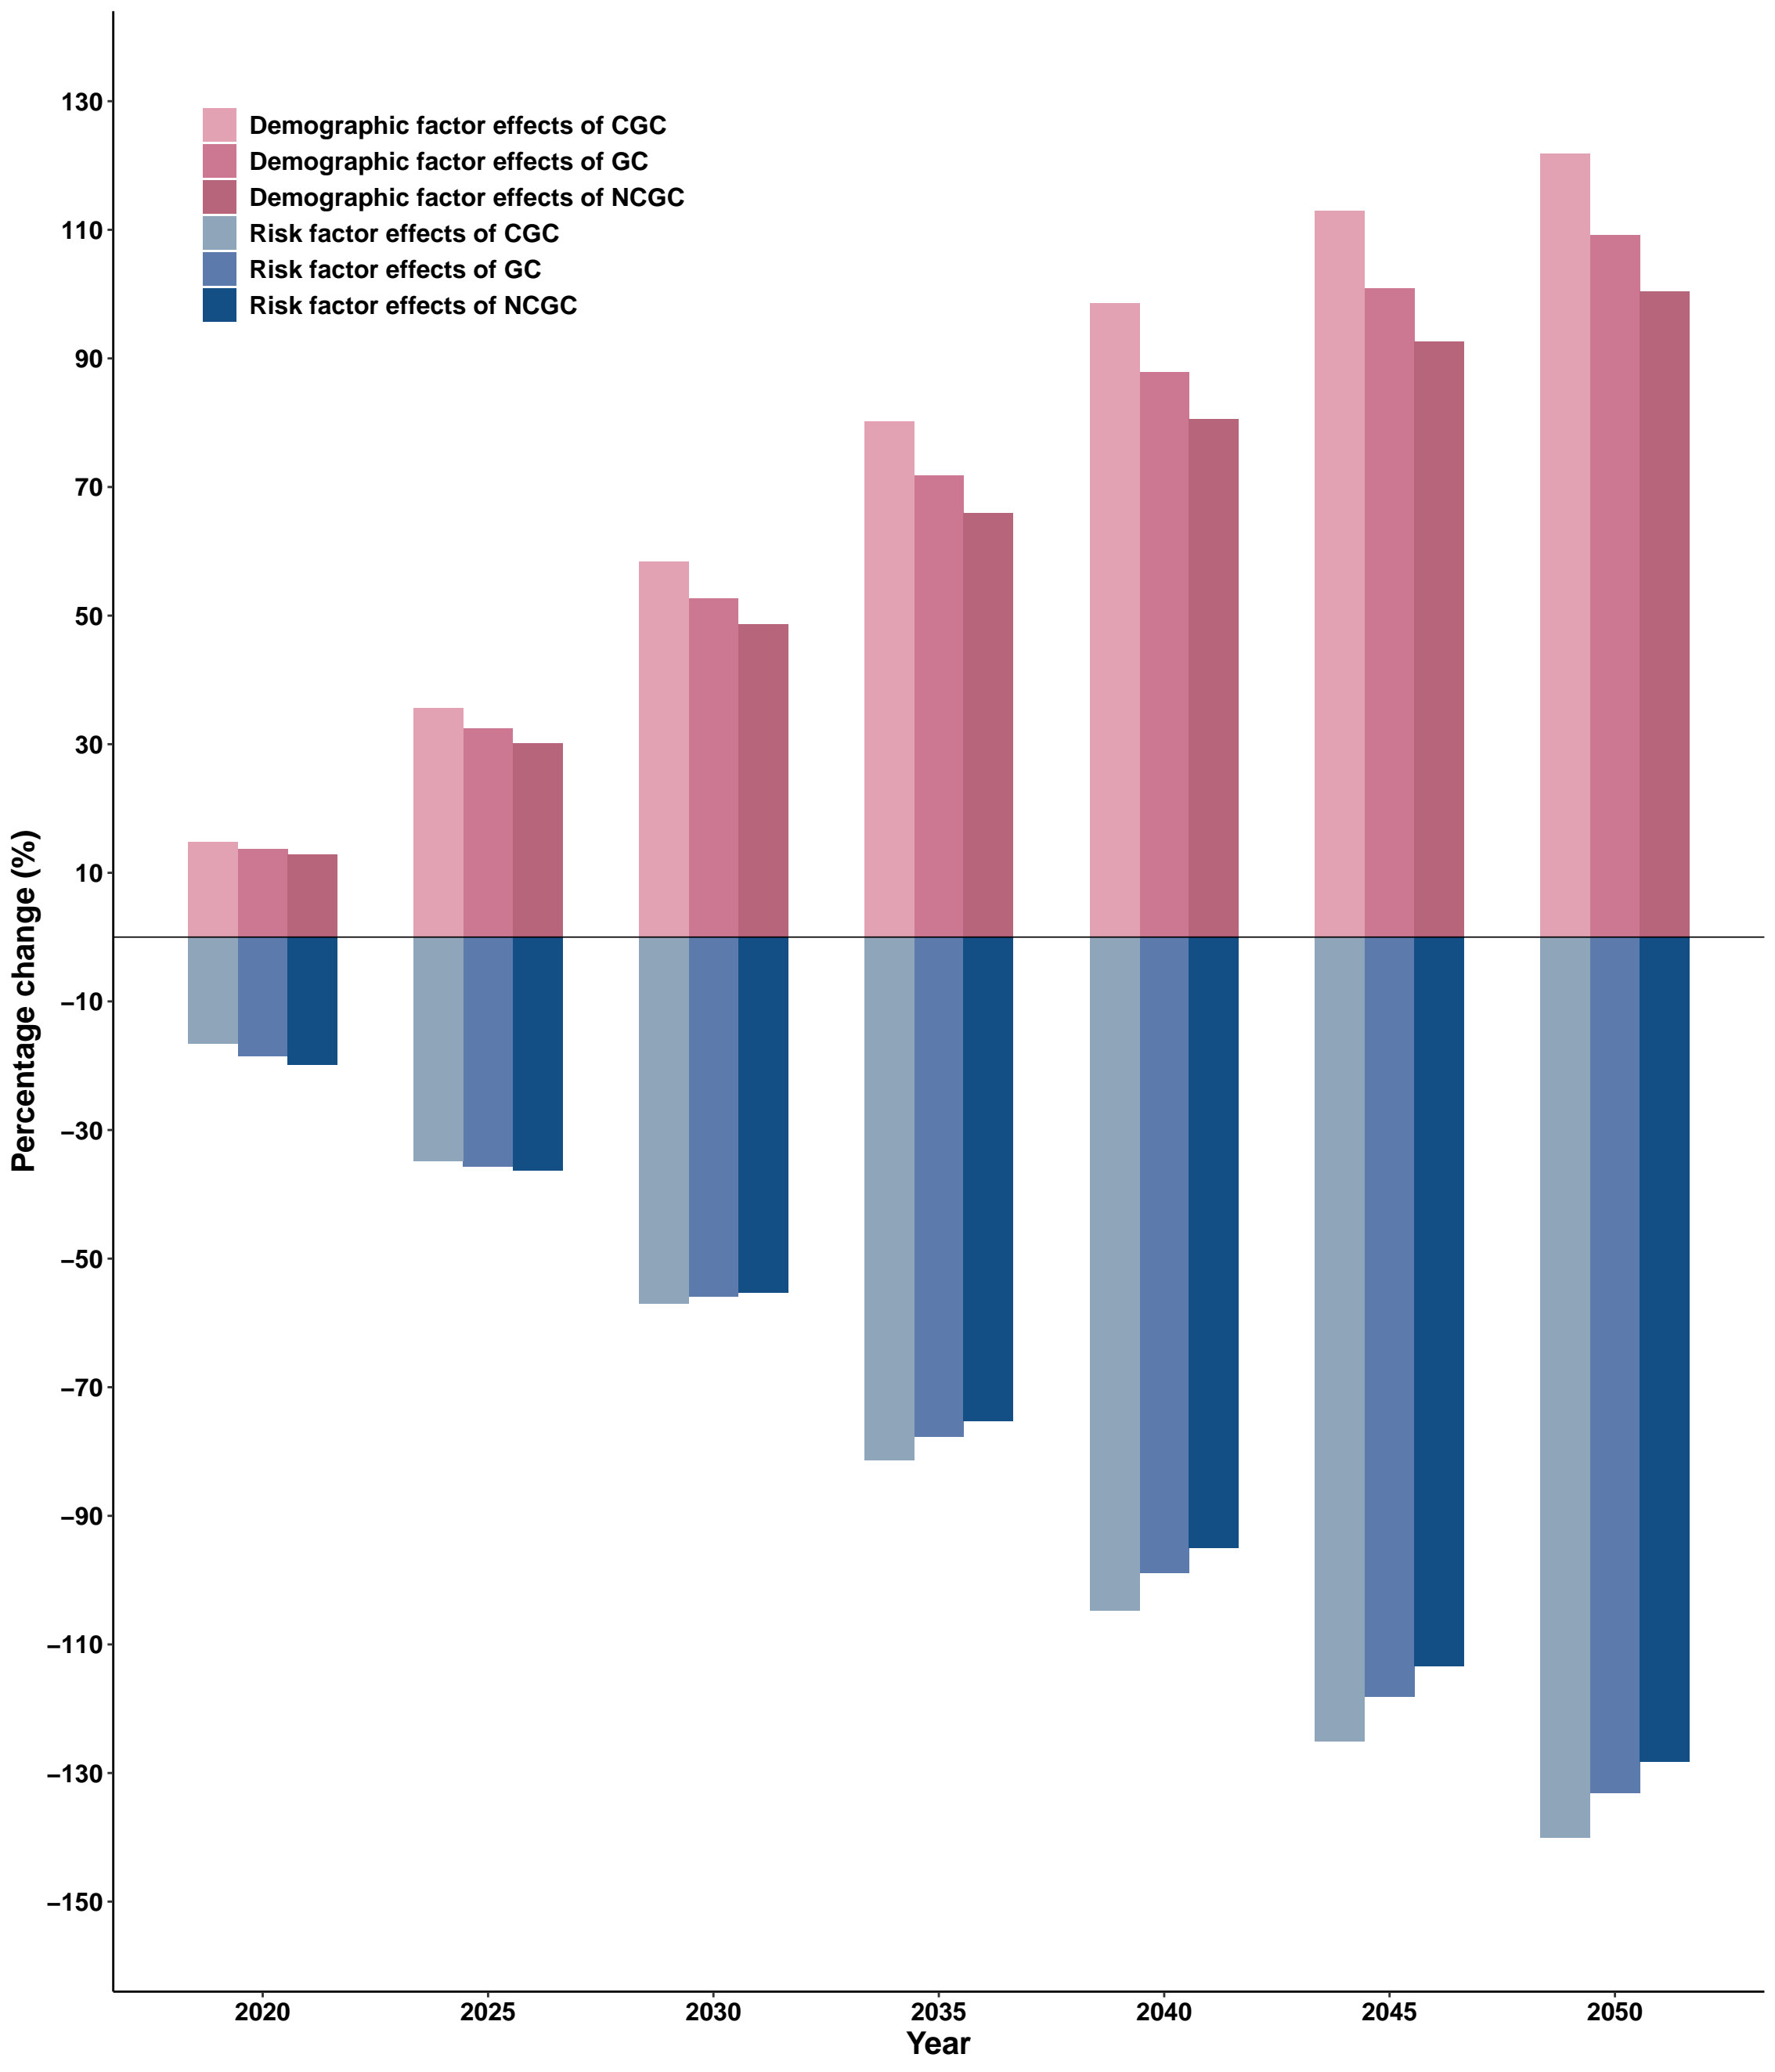

Supplement: mmc4.pdf [file mmc4.pdf]

(a)

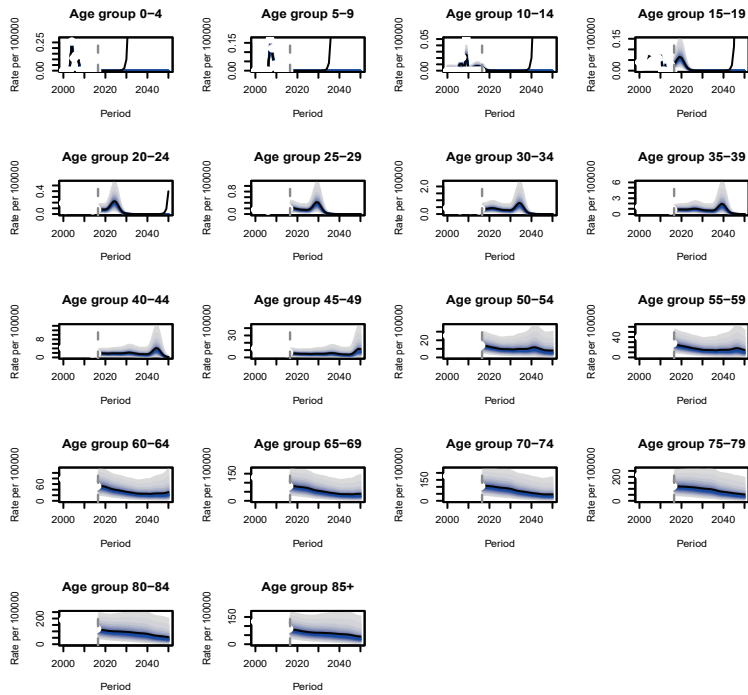

(b)

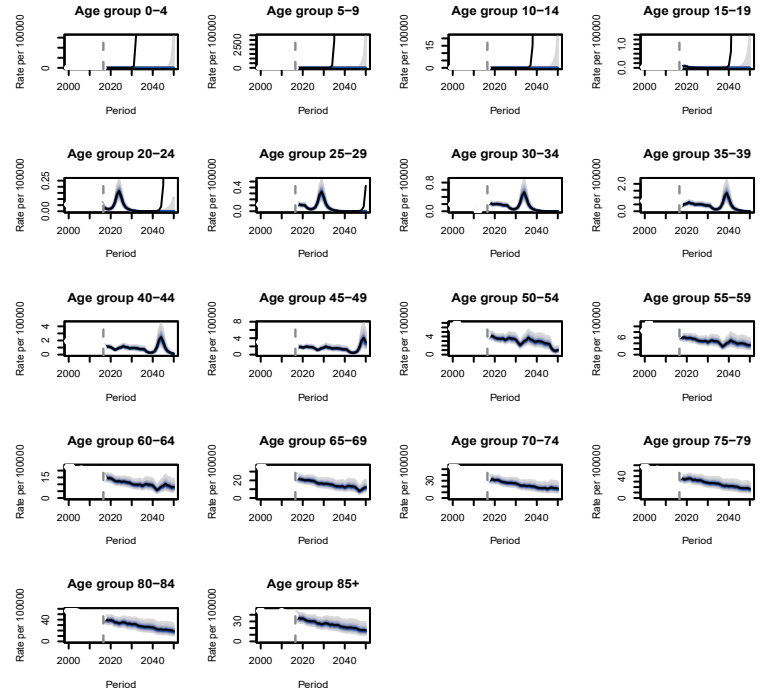

(c)

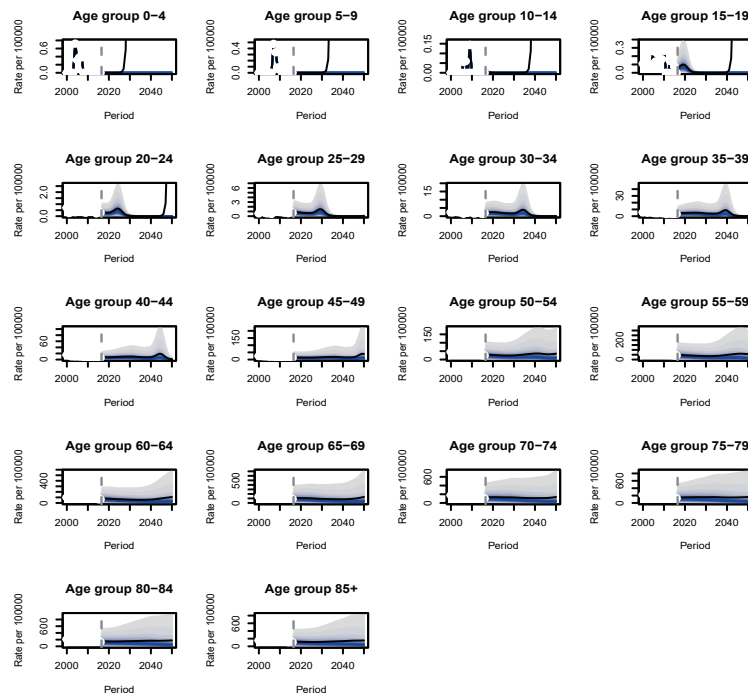

(d)

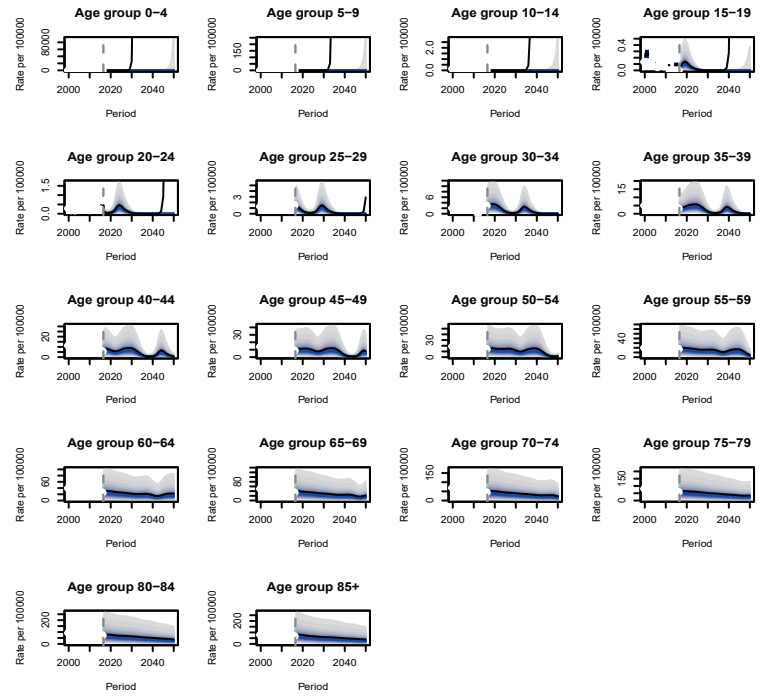

Supplement: mmc5.pdf [file mmc5.pdf]

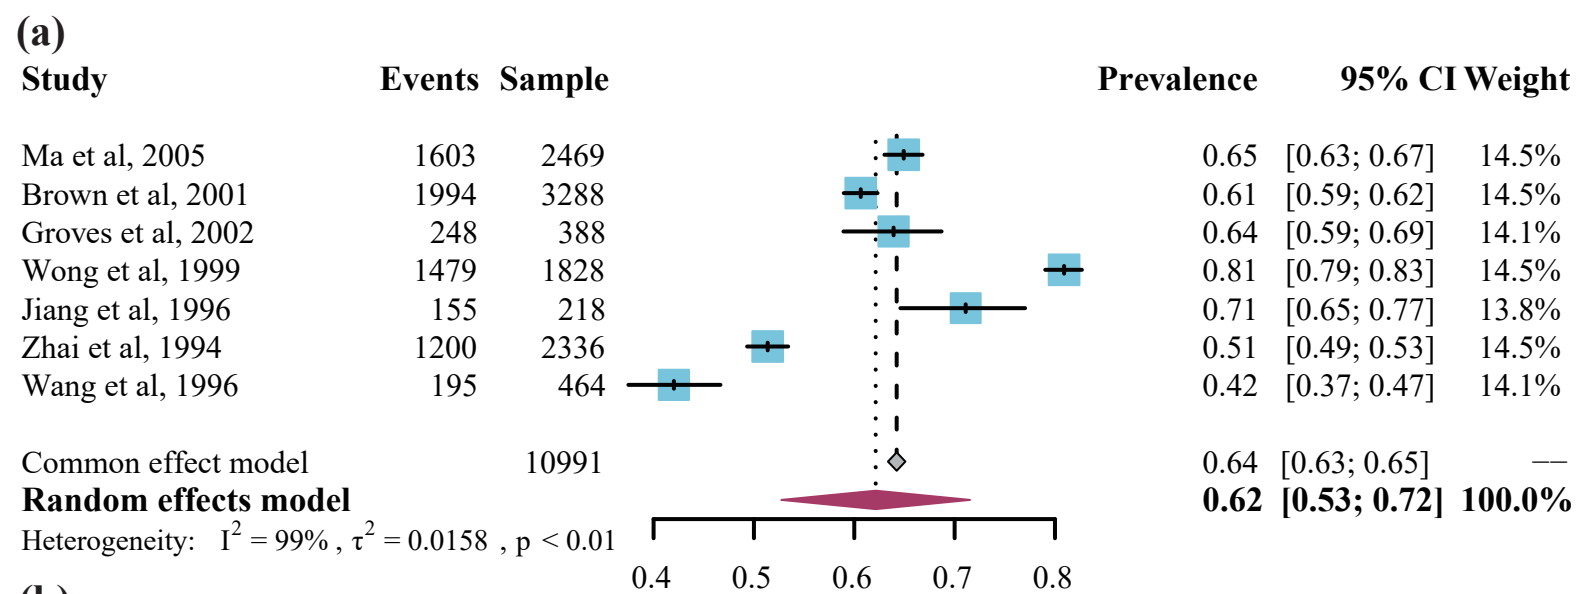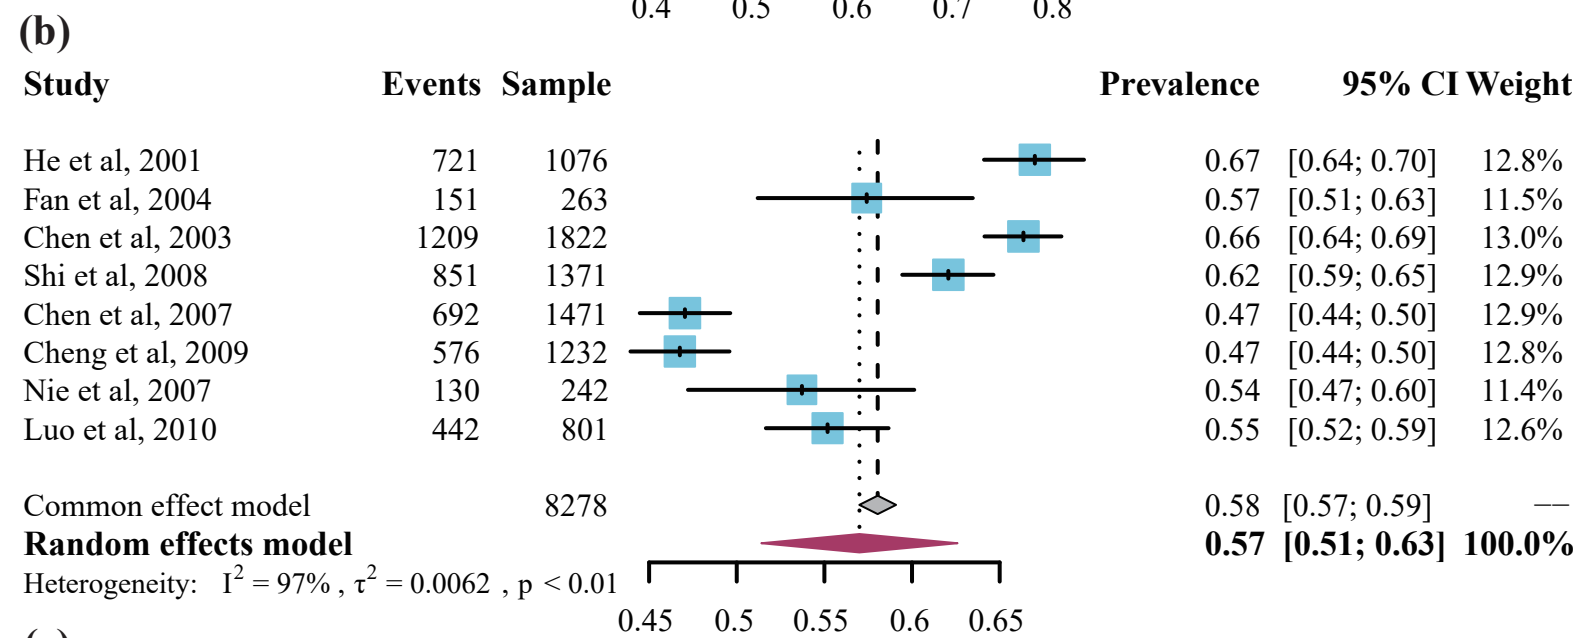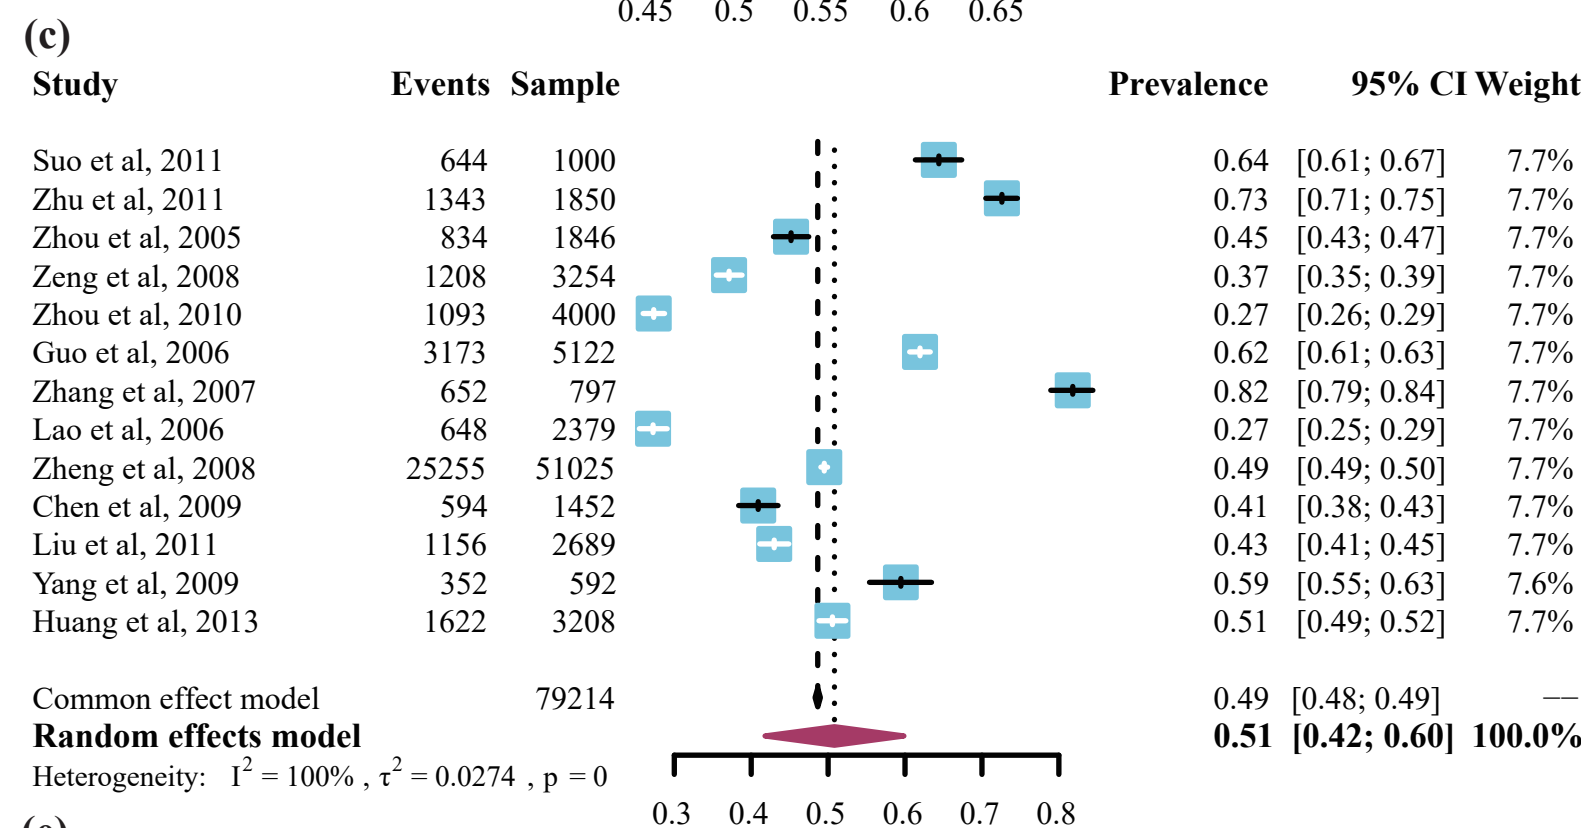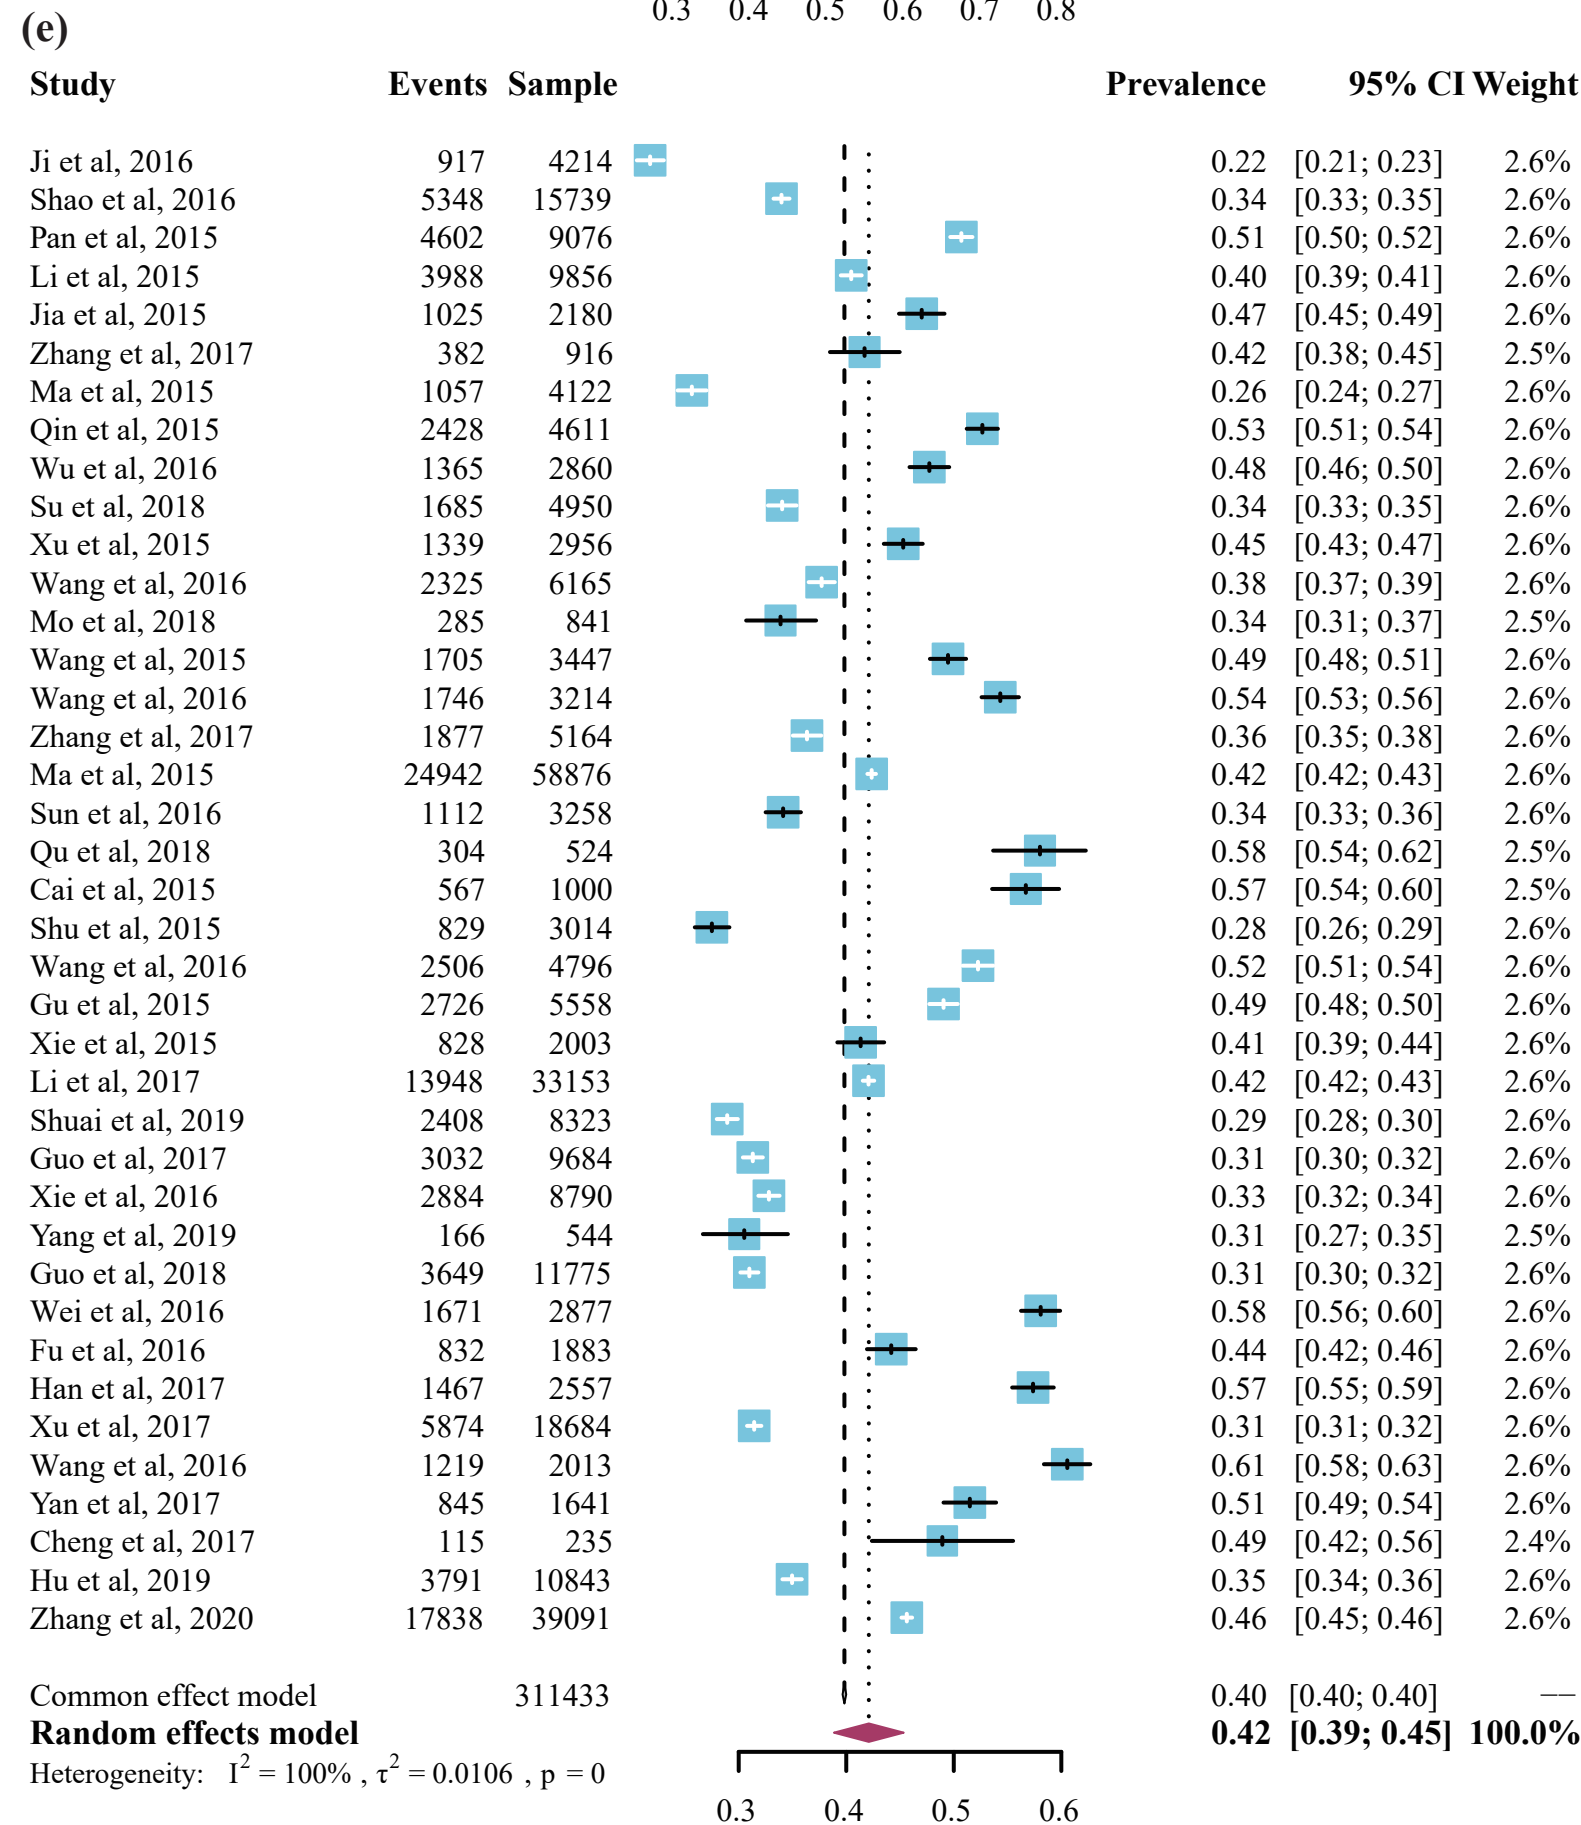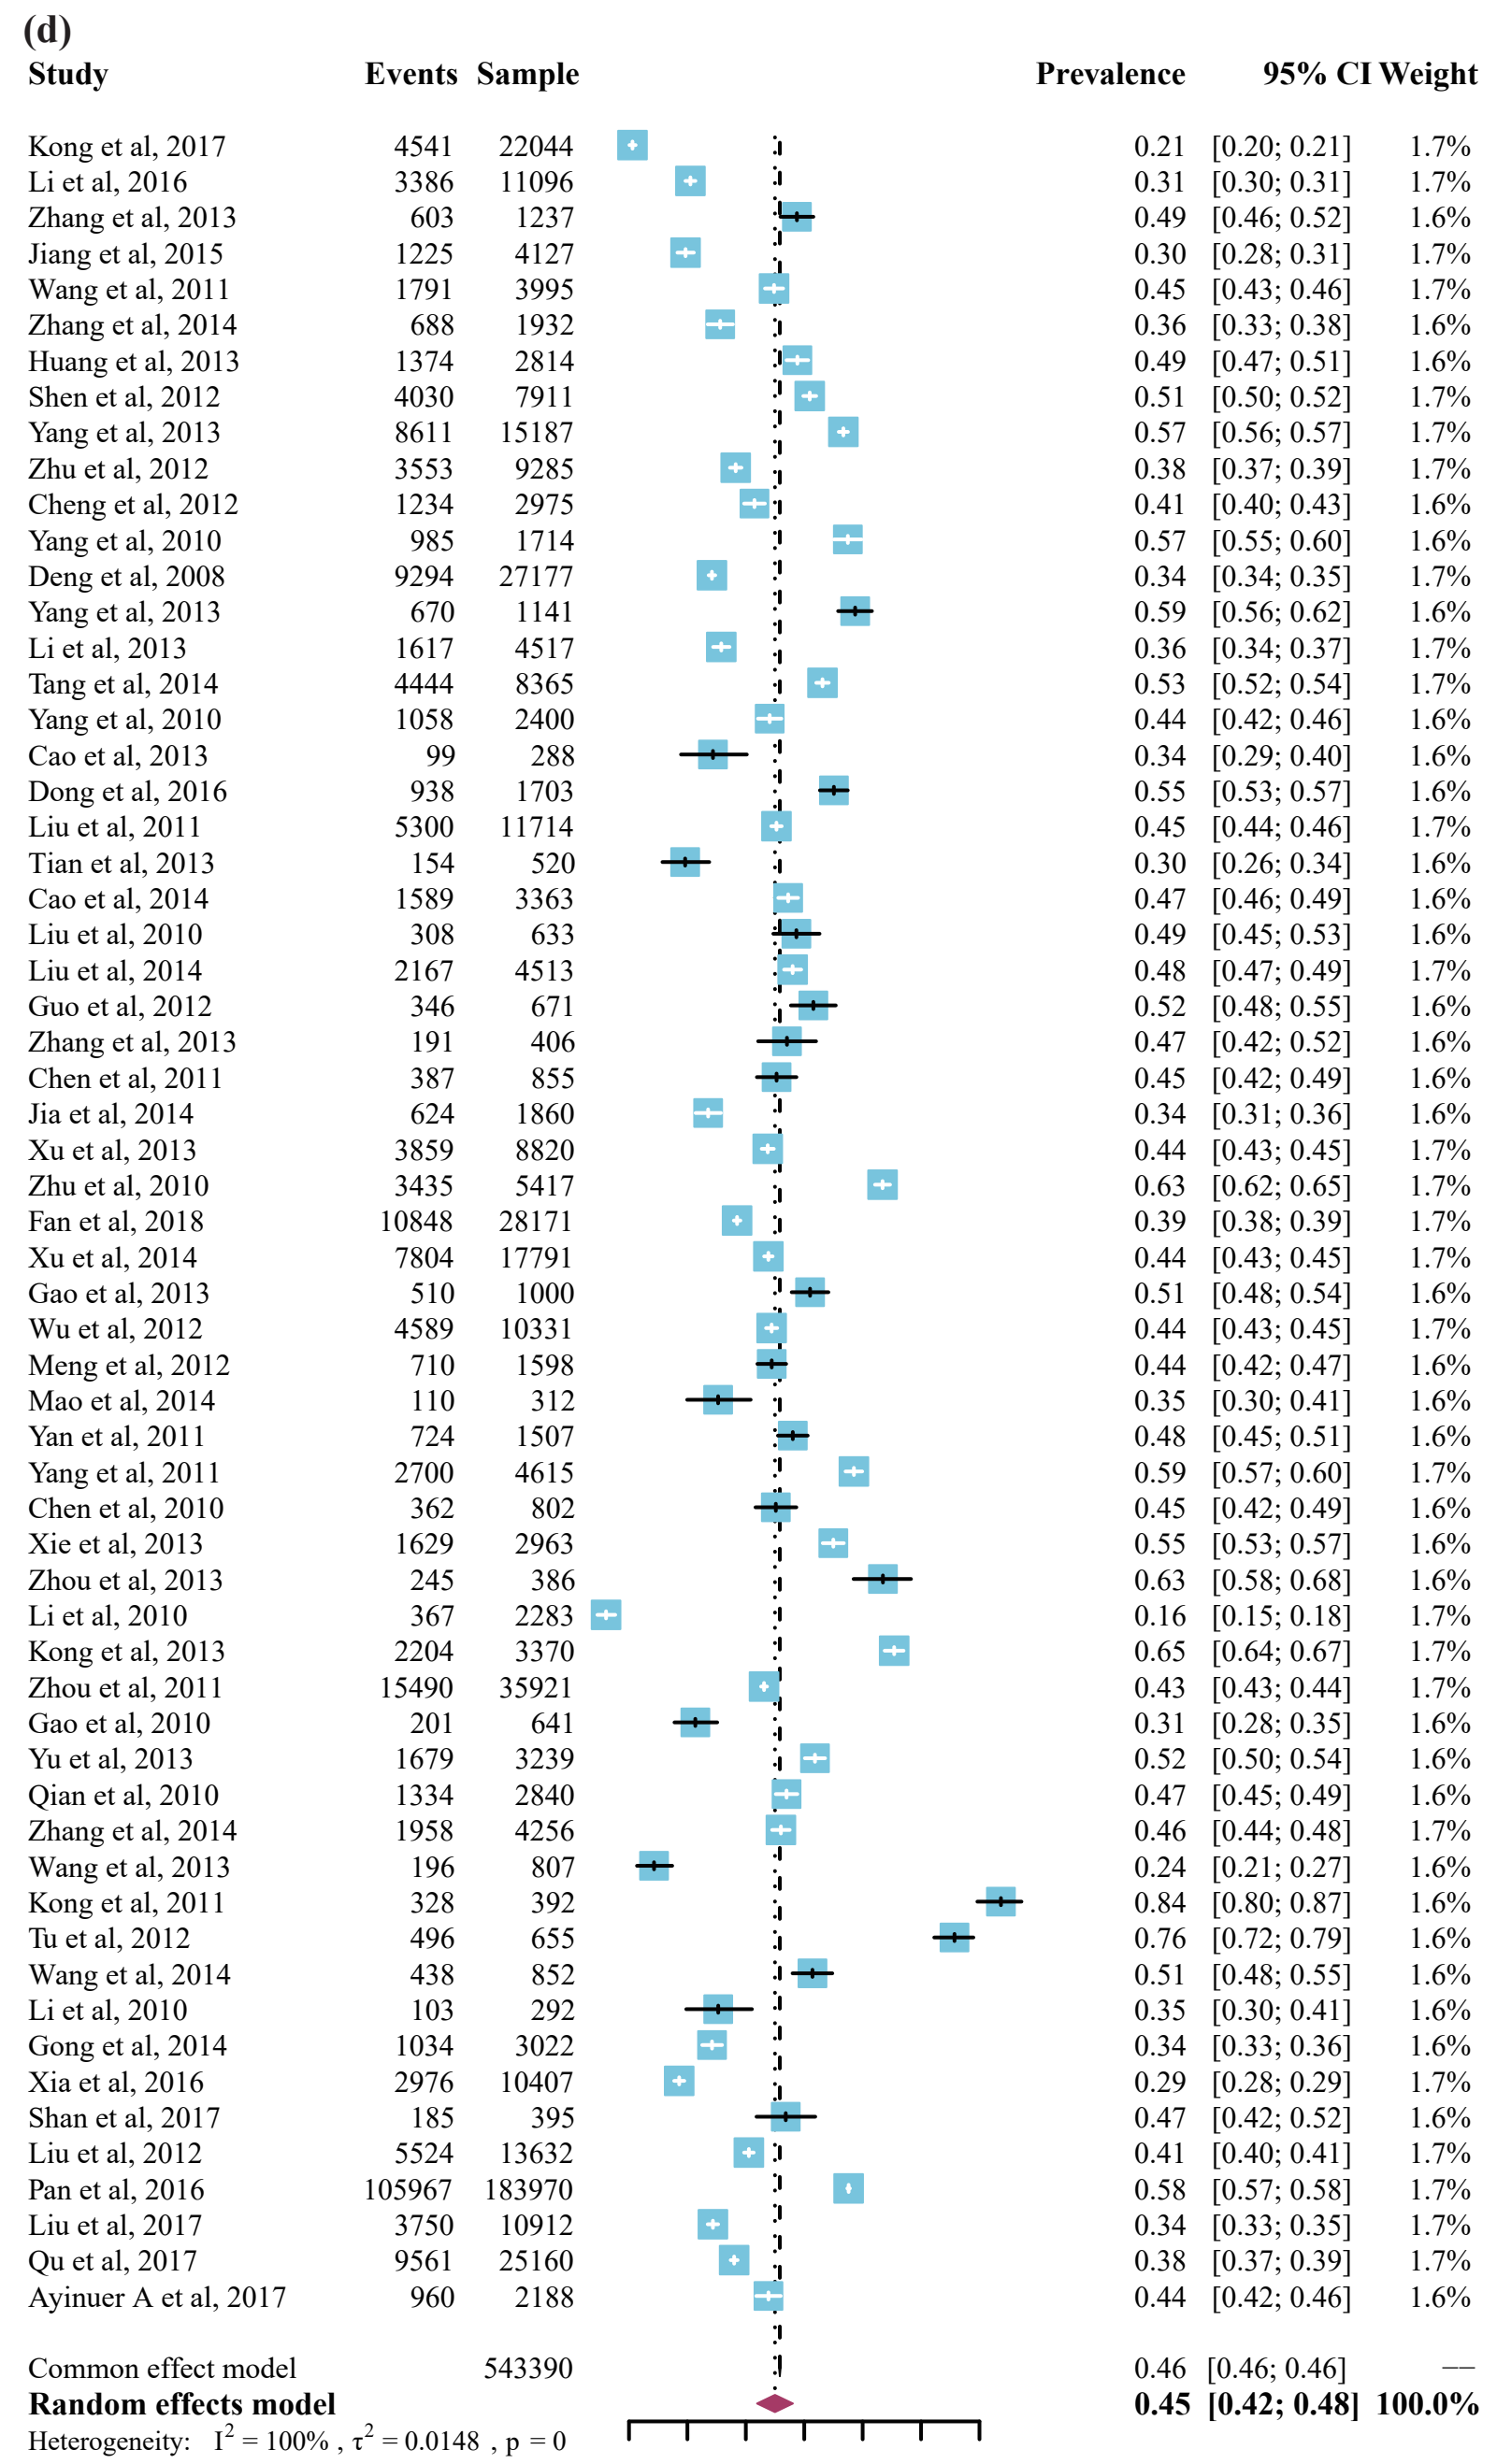

Supplement: mmc6.pdf [file mmc6.pdf]

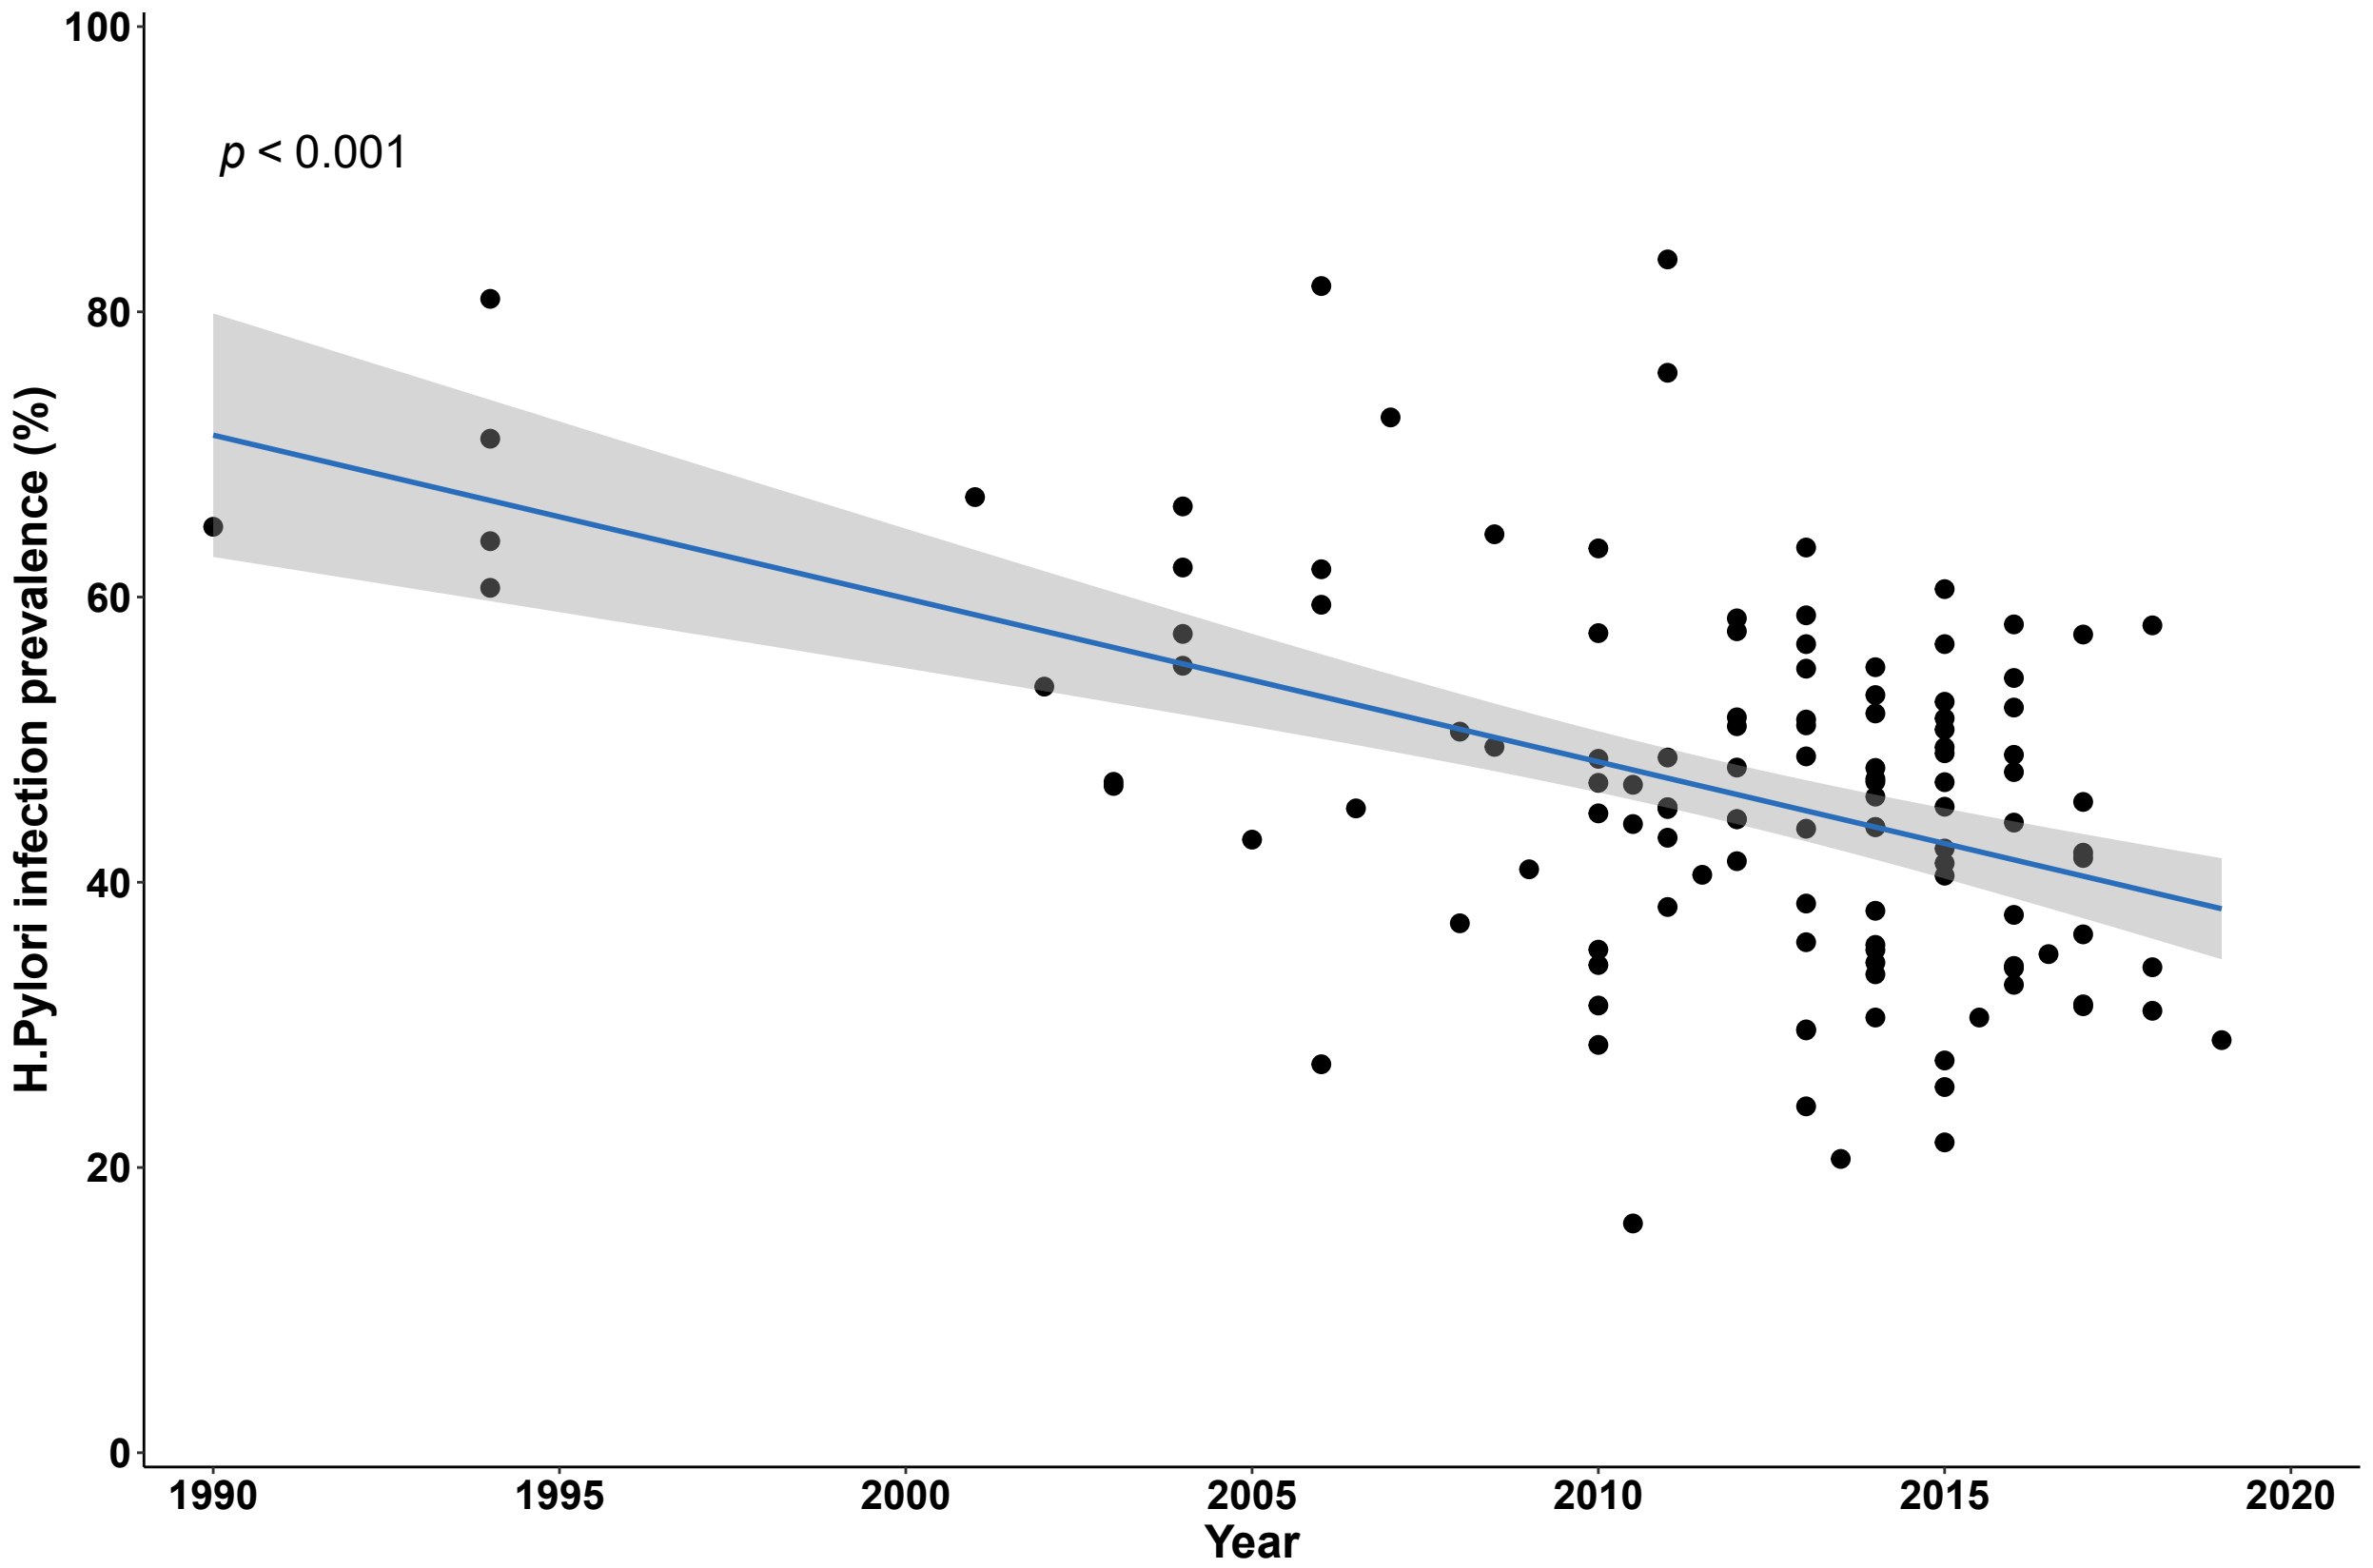

Supplement: mmc7.pdf [file mmc7.pdf]

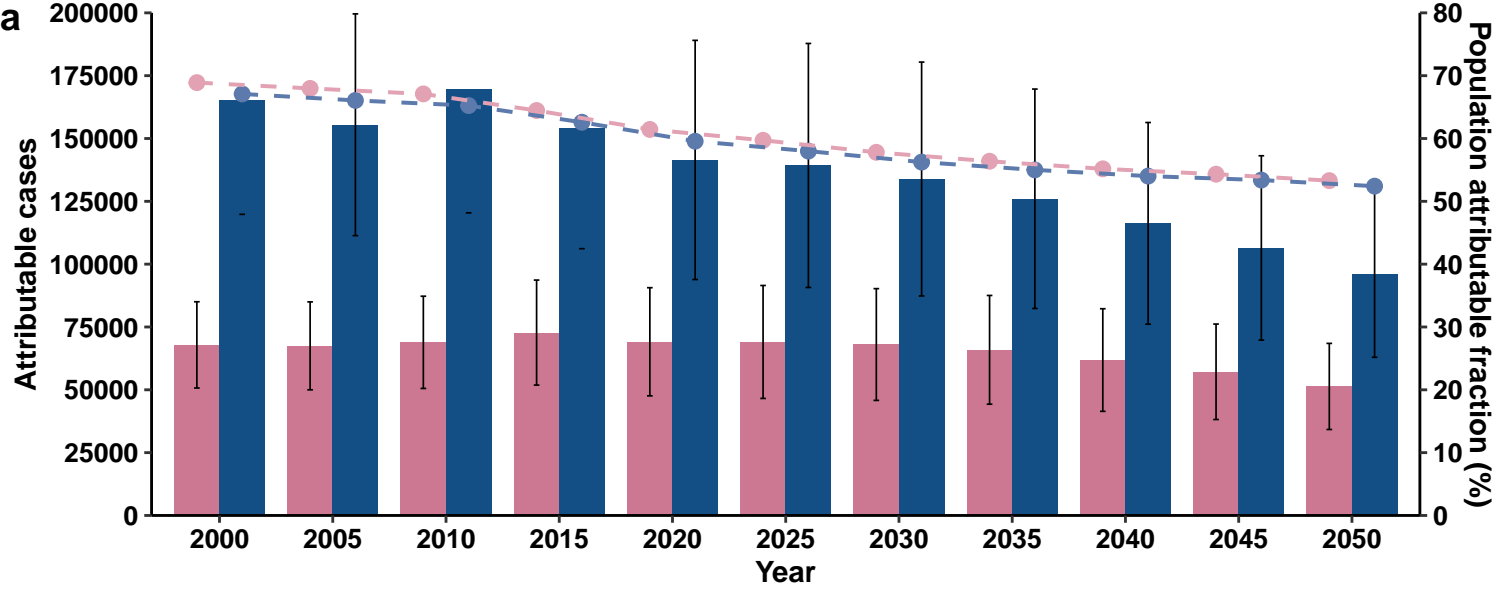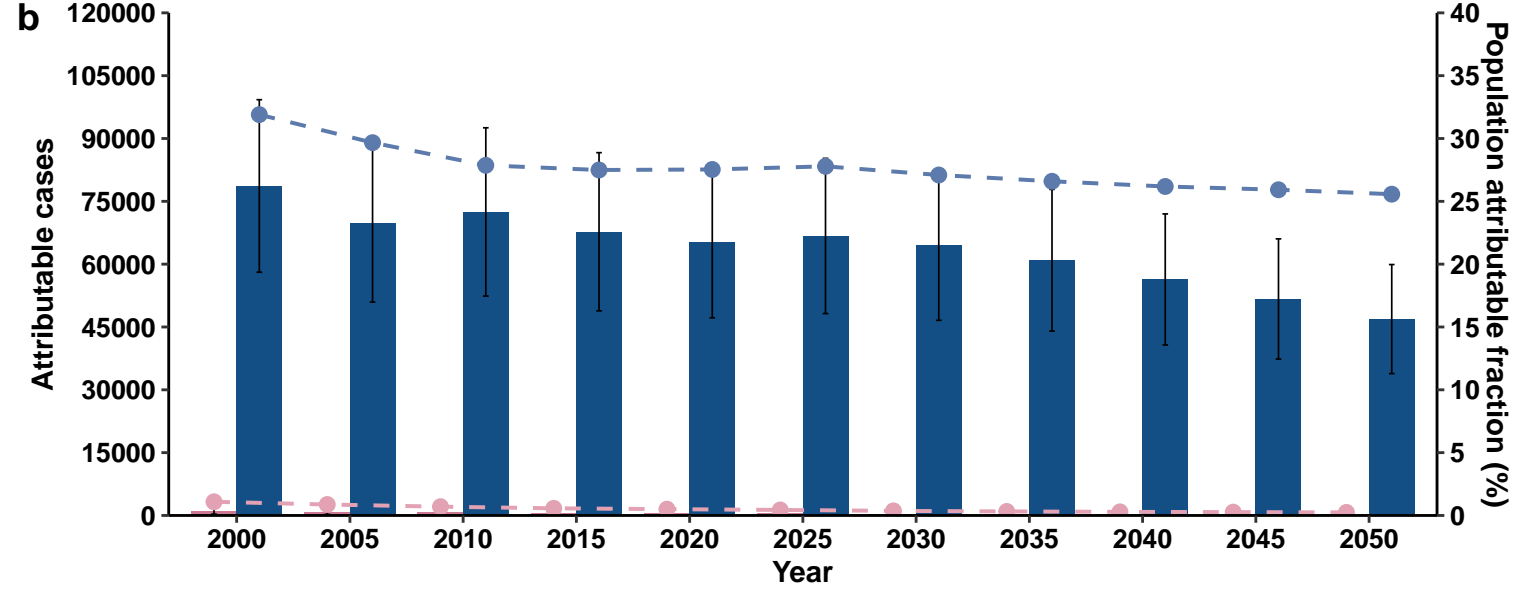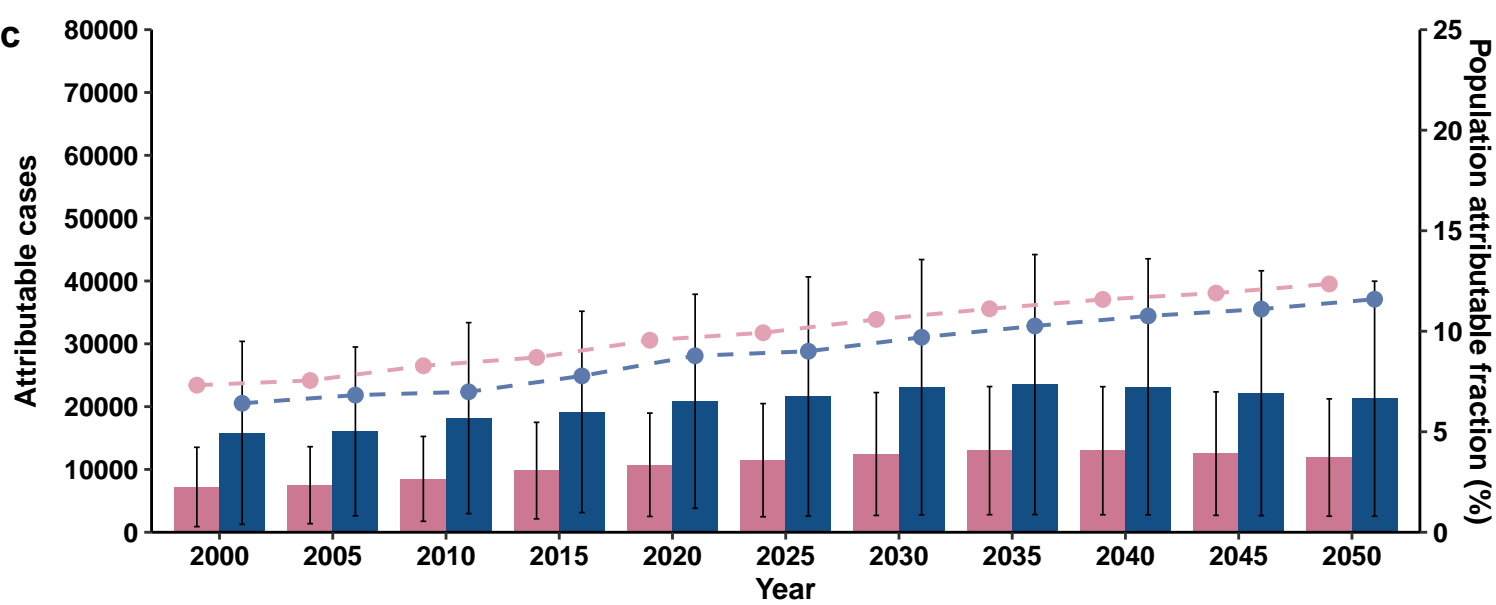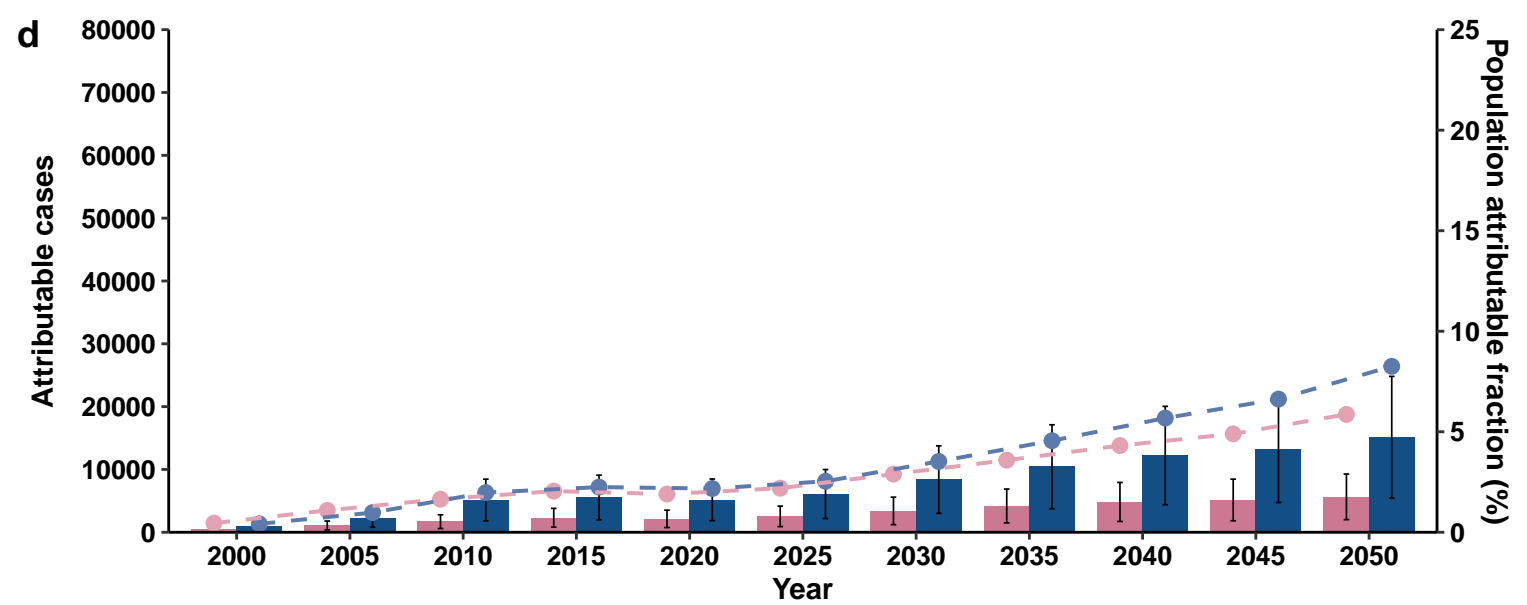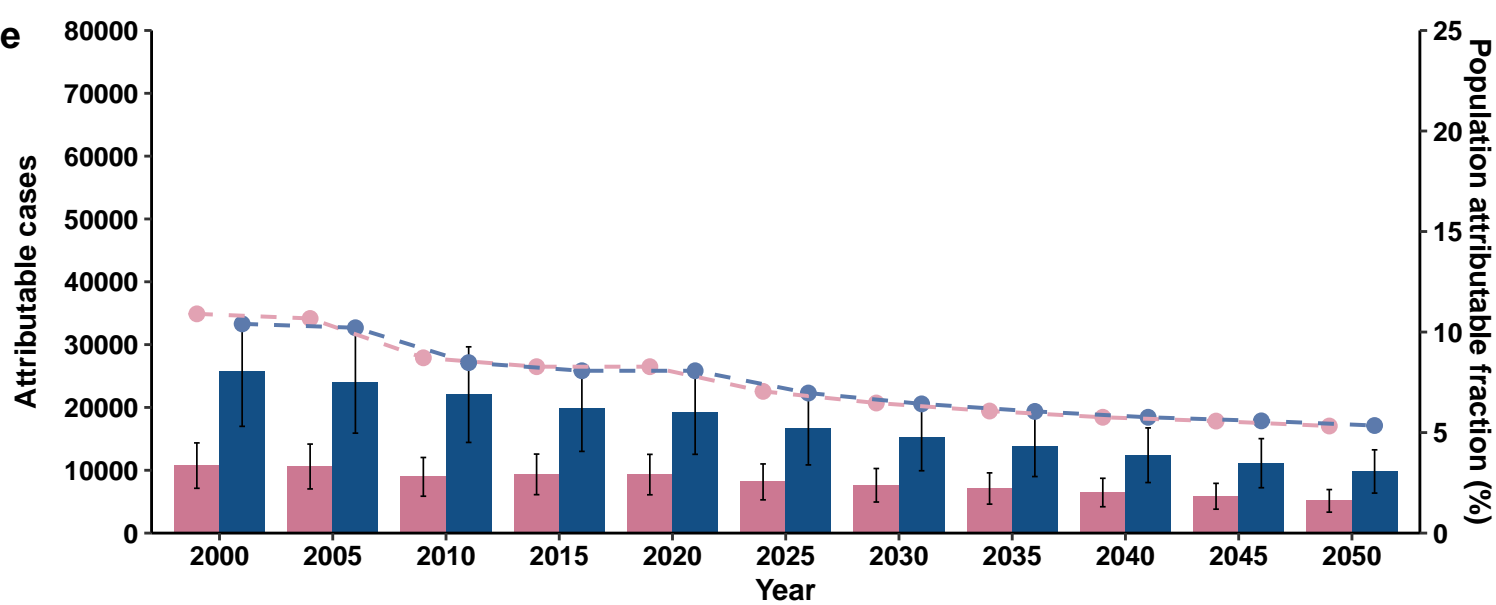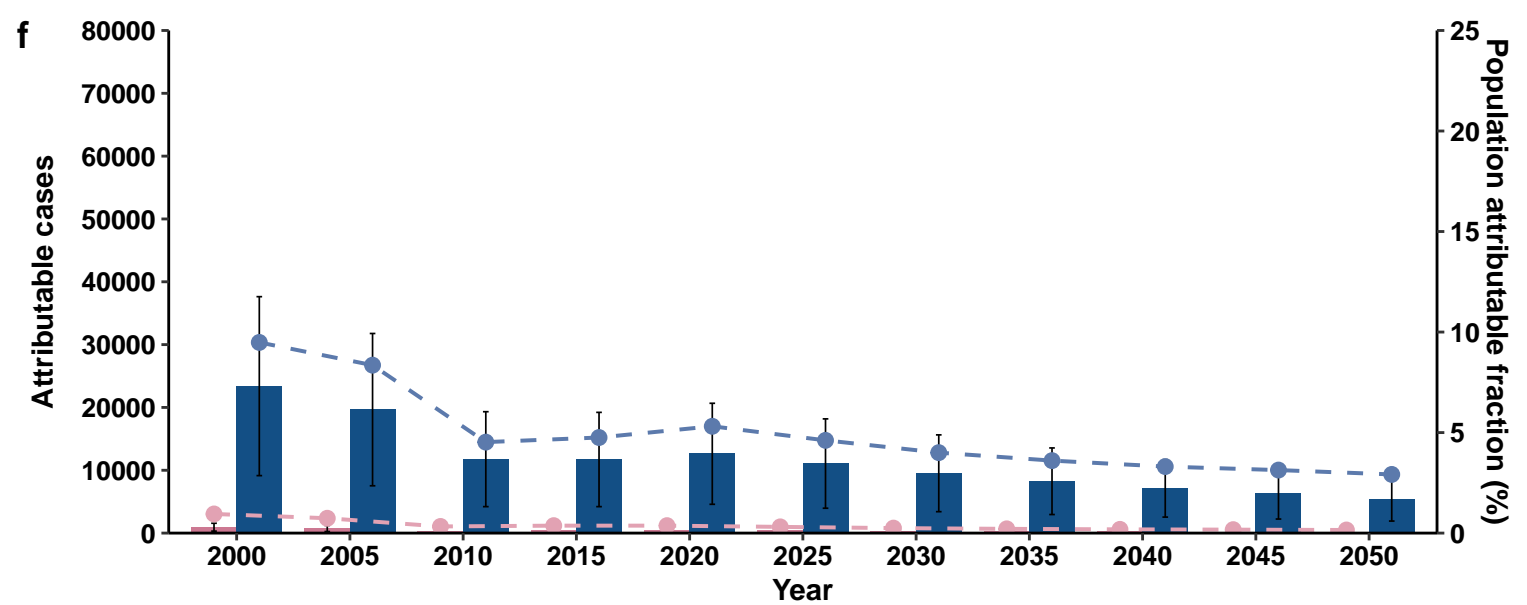

● PAF of female   
 ● PAF of male   
 ■ Attributable female cases   
 ■ Attributable male cases

Supplement: mmc8.pdf [file mmc8.pdf]
